# Supplementary material for: Adult—Juvenile interactions and temporal niche partitioning between life-stages in a tropical amphibian
Source: PLoS One. 2020 Sep 14;15(9):e0238949. doi: 10.1371/journal.pone.0238949 (PMC7489520; doi:10.1371/journal.pone.0238949)
Supplement: S1 Appendix — (XLSX) [file pone.0238949.s004.xlsx]

## Sheet: Experim juv ad
No	Date	Adult sex	Adult SVL (mm)	Adult BM (g)	Paired metam SVL (mm)	Paired metam BM (g)	Single metam SVL (mm)	Single metam BM (g)
1	2016.03.15	f	61.2	26.7	31.1	2.54	31.4	2.66
2	2016.03.15	f	63.2	27.32	33.1	3.2	33.6	3.68
3	2016.03.15	f	70.8	40.01	33.8	3.69	33.3	2.97
4	2016.03.16	m	63.1	23.8	28	1.59	26.5	1.33
5	2016.03.16	f	67.7	29.97	23.9	1.34	26.3	1.8
6	2016.03.16	f	70.9	39.54	26.7	1.54	26.7	2.12
7	2016.03.16	f	63.8	26.08	28.6	2.07	28.3	1.54
8	2016.03.16	f	60.5	26.04	27	1.56	25.6	1.39
9	2016.03.16	m	61.3	21.94	35.1	3.8	33.7	3.45
10	2016.03.17	m	62.6	21.95	26.1	1.47	27	1.65
11	2016.03.17	f	64.1	29.96	25.6	1.4	25	1.5
12	2016.03.17	m	64.4	27.86	28.1	1.64	25.5	1.53
13	2016.03.17	m	64.1	31.35	25.9	1.58	25.1	1.45
14	2016.03.17	f	67.8	30.74	28	2.1	26.3	1.72
15	2016.03.17	m	66	30.86	27.1	1.37	24.3	1.36

## Sheet: Transect
Data	Ora inceput transect	Nr indiv	Sex	SVL	LtC	G	Activitate	Precip (cm) pana la 17.00	Precip (detalii) pana la 17.00	Alte sp	Temp	Umid	Obs animale	Obs transect	Precip dupa 17.00 pana la transect	Nebulozitate
2016.01.20								0.5	a plouat finut dupa-masa seara 20
2016.01.21	19:00:00	1	f	60.8	30.8	25.95	poteca	0.1	a burat foarte putin dupa-masa 21	5 Ll+6Tj+1Tt
2016.01.21	19:00:00	2	f	63.5	32.8	31.82	ascuns in vegetatie	0.1	a burat foarte putin dupa-masa 22	5 Ll+6Tj+1Tt
2016.01.21	19:00:00	3	j	53.8	27.3	17.82	ascuns in vegetatie	0.1	a burat foarte putin dupa-masa 23	5 Ll+6Tj+1Tt
2016.01.21	19:00:00	4	j	51.5	27.8	13.11	poteca	0.1	a burat foarte putin dupa-masa 24	5 Ll+6Tj+1Tt
2016.01.21	19:00:00	5	j	53.4	27.6	16.53	poteca	0.1	a burat foarte putin dupa-masa 25	5 Ll+6Tj+1Tt
2016.01.21	19:00:00	6	j			8.19	ascuns in vegetatie	0.1	a burat foarte putin dupa-masa 26	5 Ll+6Tj+1Tt
2016.01.21	19:00:00	7	f	59.6	32.2	23.86	ascuns in vegetatie	0.1	a burat foarte putin dupa-masa 27	5 Ll+6Tj+1Tt
2016.01.21	19:00:00	8	f	57	29.8	21.22	ascuns in vegetatie	0.1	a burat foarte putin dupa-masa 28	5 Ll+6Tj+1Tt
2016.01.21	19:00:00	9	f	66.2	30.9	30.93	ascuns in vegetatie	0.1	a burat foarte putin dupa-masa 29	5 Ll+6Tj+1Tt
2016.01.21	19:00:00	10	j	52.8	27.8	15.35	ascuns in vegetatie	0.1	a burat foarte putin dupa-masa 30	5 Ll+6Tj+1Tt
2016.01.22	21:00:00	1	j	51.7	27.9	15.51	poteca	0		6 Ll + 1Tj
2016.01.22	21:00:00	2	j (m?)			14.15	ascuns in vegetatie	0		6 Ll + 1Tj
2016.01.22	21:00:00	3	j				pierdut	0		6 Ll + 1Tj
2016.01.23	23:00:00	1	j	53.2	26.6	14.24	ascuns in vegetatie	0		3 Ll + 1Tj
2016.01.24	01:00:00	1	f	58.2	28.7	18.89	poteca	0		11 Ll +1 Tj +2 Rm					a burat foarte putin chiar inainte de transect	innorat
2016.01.24	01:00:00	2	j	50.5	25.2	13.08	poteca	0		11 Ll +1 Tj +2 Rm					a burat foarte putin chiar inainte de transect	innorat
2016.01.24	01:00:00	3	j			10.59	ascuns in vegetatie	0		11 Ll +1 Tj +2 Rm					a burat foarte putin chiar inainte de transect	innorat
2016.01.24	01:00:00	4	m	58.8	29.2	19.65	ascuns in vegetatie	0		11 Ll +1 Tj +2 Rm					a burat foarte putin chiar inainte de transect	innorat
2016.01.24	01:00:00	5	m	55.8	28.5	17.5	ascuns in vegetatie	0		11 Ll +1 Tj +2 Rm					a burat foarte putin chiar inainte de transect	innorat
2016.01.24	01:00:00	6	j			8.09	ascuns in vegetatie	0		11 Ll +1 Tj +2 Rm					a burat foarte putin chiar inainte de transect	innorat
2016.01.24	01:00:00	7	j	52.2	27.8	14.08	ascuns in vegetatie	0		11 Ll +1 Tj +2 Rm					a burat foarte putin chiar inainte de transect	innorat
2016.01.25	03:00:00	1	j			12.18	ascuns in vegetatie	0.2	ploaie dupa-masa	2 Ll + 2Rm						senin, luna
2016.01.25	03:00:00	2	j (m?)	53	27.9	14.13	poteca	0.2	ploaie dupa-masa	2 Ll + 2Rm						senin, luna
2016.01.25	03:00:00	3	f	57	29.1	19.38	ascuns in vegetatie	0.2	ploaie dupa-masa	2 Ll + 2Rm						senin, luna
2016.01.26	05:00:00	1	f	57.8	29.3	19.15	ascuns in vegetatie	0		3 Ll + 3 Rm + 3 Tj						senin, luna
2016.01.26	05:00:00	2	j	52.5	26.7	16.08	ascuns in vegetatie	0		3 Ll + 3 Rm + 3 Tj						senin, luna
2016.01.27	17							0		2Ll						innorat
2016.01.28	19:00:00	1	f	63.1	32.9	31.43	poteca	0.1	a plouat dimineata	1 Rm + 3 Ll + 2Tj						innorat
2016.01.28	19:00:00	2	f	62.4	31.8	21.82	ascuns in vegetatie	0.1	a plouat dimineata	1 Rm + 3 Ll + 2Tj						innorat
2016.01.28	19:00:00	3	j		25.2	12.81	poteca	0.1	a plouat dimineata	1 Rm + 3 Ll + 2Tj						innorat
2016.01.29	23:00:00	1	f	54.7	27.5	45.18	poteca	0.15	a plouat dimineata	∞, canta sute de Ll si Tj si Tt					ploaie puternica incepand cu 21.00, transectul a fost inceput la 21.00 si reluat la 23.00; a plouat toata noaptea	innorat
2016.01.29	23:00:00	2	m	63.6	33.4	22.9	balta	0.15	a plouat dimineata	∞, canta sute de Ll si Tj si Tt					ploaie puternica incepand cu 21.00, transectul a fost inceput la 21.00 si reluat la 23.00; a plouat toata noaptea	innorat
2016.01.29	23:00:00	3	j	55.6	30	16.18	balta	0.15	a plouat dimineata	∞, canta sute de Ll si Tj si Tt					ploaie puternica incepand cu 21.00, transectul a fost inceput la 21.00 si reluat la 23.00; a plouat toata noaptea	innorat
2016.01.29	23:00:00	4	f	52.8	28.4	12.95	poteca	0.15	a plouat dimineata	∞, canta sute de Ll si Tj si Tt					ploaie puternica incepand cu 21.00, transectul a fost inceput la 21.00 si reluat la 23.00; a plouat toata noaptea	innorat
2016.01.29	23:00:00	5						0.15	a plouat dimineata	∞, canta sute de Ll si Tj si Tt			pierdut		ploaie puternica incepand cu 21.00, transectul a fost inceput la 21.00 si reluat la 23.00; a plouat toata noaptea	innorat
2016.01.29	23:00:00	6	m	57.9	28.8	19.7	canta	0.15	a plouat dimineata	∞, canta sute de Ll si Tj si Tt					ploaie puternica incepand cu 21.00, transectul a fost inceput la 21.00 si reluat la 23.00; a plouat toata noaptea	innorat
2016.01.29	23:00:00	7	f	53.6	27	14.07	ascuns in vegetatie	0.15	a plouat dimineata	∞, canta sute de Ll si Tj si Tt					ploaie puternica incepand cu 21.00, transectul a fost inceput la 21.00 si reluat la 23.00; a plouat toata noaptea	innorat
2016.01.29	23:00:00	8	m	53.9	28.1	19.57	ascuns in vegetatie	0.15	a plouat dimineata	∞, canta sute de Ll si Tj si Tt					ploaie puternica incepand cu 21.00, transectul a fost inceput la 21.00 si reluat la 23.00; a plouat toata noaptea	innorat
2016.01.29	23:00:00	9	f	52.1	26.2	13.14	ascuns in vegetatie	0.15	a plouat dimineata	∞, canta sute de Ll si Tj si Tt					ploaie puternica incepand cu 21.00, transectul a fost inceput la 21.00 si reluat la 23.00; a plouat toata noaptea	innorat
2016.01.29	23:00:00	11	f	60.5	30.2	27.84	poteca	0.15	a plouat dimineata	∞, canta sute de Ll si Tj si Tt			fara ochi drept		ploaie puternica incepand cu 21.00, transectul a fost inceput la 21.00 si reluat la 23.00; a plouat toata noaptea	innorat
2016.01.29	23:00:00	12	f	54.8	27.3	13.85	ascuns in vegetatie	0.15	a plouat dimineata	∞, canta sute de Ll si Tj si Tt					ploaie puternica incepand cu 21.00, transectul a fost inceput la 21.00 si reluat la 23.00; a plouat toata noaptea	innorat
2016.01.29	23:00:00	13	f	62.2	29.6	25.38	poteca	0.15	a plouat dimineata	∞, canta sute de Ll si Tj si Tt					ploaie puternica incepand cu 21.00, transectul a fost inceput la 21.00 si reluat la 23.00; a plouat toata noaptea	innorat
2016.01.29	23:00:00	14	m	63.1	31.9	23.66	ascuns in vegetatie	0.15	a plouat dimineata	∞, canta sute de Ll si Tj si Tt					ploaie puternica incepand cu 21.00, transectul a fost inceput la 21.00 si reluat la 23.00; a plouat toata noaptea	innorat
2016.01.29	23:00:00	15	m	63.1	32	28.26	canta	0.15	a plouat dimineata	∞, canta sute de Ll si Tj si Tt					ploaie puternica incepand cu 21.00, transectul a fost inceput la 21.00 si reluat la 23.00; a plouat toata noaptea	innorat
2016.01.29	23:00:00	16	f	62.2	32	28.97	ascuns in vegetatie	0.15	a plouat dimineata	∞, canta sute de Ll si Tj si Tt					ploaie puternica incepand cu 21.00, transectul a fost inceput la 21.00 si reluat la 23.00; a plouat toata noaptea	innorat
2016.01.29	23:00:00	17	m	57.8	30.3	21.75	ascuns in vegetatie	0.15	a plouat dimineata	∞, canta sute de Ll si Tj si Tt					ploaie puternica incepand cu 21.00, transectul a fost inceput la 21.00 si reluat la 23.00; a plouat toata noaptea	innorat
2016.01.29	23:00:00	18	j			11.03	ascuns in vegetatie	0.15	a plouat dimineata	∞, canta sute de Ll si Tj si Tt					ploaie puternica incepand cu 21.00, transectul a fost inceput la 21.00 si reluat la 23.00; a plouat toata noaptea	innorat
2016.01.29	23:00:00	19	m	59.9	28.6	23.19	ascuns in vegetatie	0.15	a plouat dimineata	∞, canta sute de Ll si Tj si Tt					ploaie puternica incepand cu 21.00, transectul a fost inceput la 21.00 si reluat la 23.00; a plouat toata noaptea	innorat
2016.01.29	23:00:00	20	m	59.3	29.6	23.82	ascuns in vegetatie	0.15	a plouat dimineata	∞, canta sute de Ll si Tj si Tt					ploaie puternica incepand cu 21.00, transectul a fost inceput la 21.00 si reluat la 23.00; a plouat toata noaptea	innorat
2016.01.29	23:00:00	21	m	63	32.2	26.34	ascuns in vegetatie	0.15	a plouat dimineata	∞, canta sute de Ll si Tj si Tt					ploaie puternica incepand cu 21.00, transectul a fost inceput la 21.00 si reluat la 23.00; a plouat toata noaptea	innorat
2016.01.30	21:00:00	1	m	62.8	32.2	26.31	ascuns in vegetatie	7.4	a plouat toata noaptea si intermitent ziua	10 Ll; canta sute de Ll si Tj si Tt						innorat
2016.01.30	21:00:00	2	f	56.1	29.7	18.81	poteca	7.4	a plouat toata noaptea si intermitent ziua	10 Ll; canta sute de Ll si Tj si Tt						innorat
2016.01.30	21:00:00	3	f	61.5	29.5	24.93	ascuns in vegetatie	7.4	a plouat toata noaptea si intermitent ziua	10 Ll; canta sute de Ll si Tj si Tt						innorat
2016.01.30	21:00:00	4	f	54	25.6	14.62	ascuns in vegetatie	7.4	a plouat toata noaptea si intermitent ziua	10 Ll; canta sute de Ll si Tj si Tt						innorat
2016.01.30	21:00:00	5	f	58	31.7	20.56	poteca	7.4	a plouat toata noaptea si intermitent ziua	10 Ll; canta sute de Ll si Tj si Tt						innorat
2016.01.30	21:00:00	6	f	56.1	29	15.34	ascuns in vegetatie	7.4	a plouat toata noaptea si intermitent ziua	10 Ll; canta sute de Ll si Tj si Tt						innorat
2016.01.30	21:00:00	7	f			11.08	poteca	7.4	a plouat toata noaptea si intermitent ziua	10 Ll; canta sute de Ll si Tj si Tt						innorat
2016.01.30	21:00:00	8	m	58.1	29.7	18.94	poteca	7.4	a plouat toata noaptea si intermitent ziua	10 Ll; canta sute de Ll si Tj si Tt						innorat
2016.01.30	21:00:00	9	m	62.6	31.7	23.59	poteca	7.4	a plouat toata noaptea si intermitent ziua	10 Ll; canta sute de Ll si Tj si Tt						innorat
2016.01.30	21:00:00	10	m	61.7	30.8	26.68	poteca	7.4	a plouat toata noaptea si intermitent ziua	10 Ll; canta sute de Ll si Tj si Tt						innorat
2016.01.30	21:00:00	11	m	61.9	31.3	20.91	ascuns in vegetatie	7.4	a plouat toata noaptea si intermitent ziua	10 Ll; canta sute de Ll si Tj si Tt						innorat
2016.01.30	21:00:00	12	f	69.8	34.2	34.89	ascuns in vegetatie	7.4	a plouat toata noaptea si intermitent ziua	10 Ll; canta sute de Ll si Tj si Tt						innorat
2016.01.30	21:00:00	13	f	61.9	29.7	21.72	poteca	7.4	a plouat toata noaptea si intermitent ziua	10 Ll; canta sute de Ll si Tj si Tt						innorat
2016.01.30	21:00:00	14	m	62.6	31.6	26.04	ascuns in vegetatie	7.4	a plouat toata noaptea si intermitent ziua	10 Ll; canta sute de Ll si Tj si Tt						innorat
2016.01.30	21:00:00	15	m	58.8	30.1	21.27	poteca	7.4	a plouat toata noaptea si intermitent ziua	10 Ll; canta sute de Ll si Tj si Tt						innorat
2016.01.31	01:00:00	1	m	53.3	28.7	17.65	ascuns in vegetatie	0		8 Ll + 2Rm + 2 Tj + 1 Tt, canta Ll, T, Ep
2016.01.31	01:00:00	2	f	59	29.7	21.59	ascuns in vegetatie	0		8 Ll + 2Rm + 2 Tj + 1 Tt, canta Ll, T, Ep
2016.01.31	01:00:00	3	f	60.5	32.1	23.49	ascuns in vegetatie	0		8 Ll + 2Rm + 2 Tj + 1 Tt, canta Ll, T, Ep
2016.01.31	01:00:00	4	m	53.3	26.6	14.33	ascuns in vegetatie	0		8 Ll + 2Rm + 2 Tj + 1 Tt, canta Ll, T, Ep
2016.01.31	01:00:00	5	m			11.4	ascuns in vegetatie	0		8 Ll + 2Rm + 2 Tj + 1 Tt, canta Ll, T, Ep
2016.01.31	01:00:00	6	m	59.3	29.2	24.7	ascuns in vegetatie	0		8 Ll + 2Rm + 2 Tj + 1 Tt, canta Ll, T, Ep
2016.01.31	01:00:00	11	m	61.6	30.9	25.81	ascuns in vegetatie	0		8 Ll + 2Rm + 2 Tj + 1 Tt, canta Ll, T, Ep
2016.01.31	01:00:00	12	f	52.1	25.3	14.99	ascuns in vegetatie	0		8 Ll + 2Rm + 2 Tj + 1 Tt, canta Ll, T, Ep
2016.01.31	01:00:00	13	f	61.4	31.4	24.95	poteca	0		8 Ll + 2Rm + 2 Tj + 1 Tt, canta Ll, T, Ep
2016.01.31	01:00:00	14	f			10.4	poteca	0		8 Ll + 2Rm + 2 Tj + 1 Tt, canta Ll, T, Ep
2016.01.31	01:00:00	15	m	57.3	28.7	20.95	poteca	0		8 Ll + 2Rm + 2 Tj + 1 Tt, canta Ll, T, Ep
2016.01.31	01:00:00	16	f			11.27	ascuns in vegetatie	0		8 Ll + 2Rm + 2 Tj + 1 Tt, canta Ll, T, Ep
2016.02.01	03:00:00	1	f	50.3	25.9	11.19	ascuns in vegetatie	0.01	a burat foarte putin in jur de 13.00	4 Ll + 4Tj, canta Cs, Ll, Tj, Ep					a plouat intre 18.00 - 20.00	innorat
2016.02.01	03:00:00	2	f	70.1	36.7	48.5	ascuns in vegetatie	0.01	a burat foarte putin in jur de 13.00	4 Ll + 4Tj, canta Cs, Ll, Tj, Ep					a plouat intre 18.00 - 20.00	innorat
2016.02.01	03:00:00	3	f	56.7	30.8	18.67	poteca	0.01	a burat foarte putin in jur de 13.00	4 Ll + 4Tj, canta Cs, Ll, Tj, Ep					a plouat intre 18.00 - 20.00	innorat
2016.02.01	03:00:00	4	f	57.2	29.2	20.41	ascuns in vegetatie	0.01	a burat foarte putin in jur de 13.00	4 Ll + 4Tj, canta Cs, Ll, Tj, Ep					a plouat intre 18.00 - 20.00	innorat
2016.02.01	03:00:00	5	f	56.7	26.7	21.75	poteca	0.01	a burat foarte putin in jur de 13.00	4 Ll + 4Tj, canta Cs, Ll, Tj, Ep					a plouat intre 18.00 - 20.00	innorat
2016.02.01	03:00:00	6	f	57.8	29.1	19.57	poteca	0.01	a burat foarte putin in jur de 13.00	4 Ll + 4Tj, canta Cs, Ll, Tj, Ep					a plouat intre 18.00 - 20.00	innorat
2016.02.01	03:00:00	7	m	61.9	29.2	24.86	ascuns in vegetatie	0.01	a burat foarte putin in jur de 13.00	4 Ll + 4Tj, canta Cs, Ll, Tj, Ep					a plouat intre 18.00 - 20.00	innorat
2016.02.01	03:00:00	8	f	53.3	25.6	14.4	ascuns in vegetatie	0.01	a burat foarte putin in jur de 13.00	4 Ll + 4Tj, canta Cs, Ll, Tj, Ep					a plouat intre 18.00 - 20.00	innorat
2016.02.01	03:00:00	9	m			10.95	ascuns in vegetatie	0.01	a burat foarte putin in jur de 13.00	4 Ll + 4Tj, canta Cs, Ll, Tj, Ep					a plouat intre 18.00 - 20.00	innorat
2016.02.01	03:00:00	10	m	59.5	32.1	24	ascuns in vegetatie	0.01	a burat foarte putin in jur de 13.00	4 Ll + 4Tj, canta Cs, Ll, Tj, Ep					a plouat intre 18.00 - 20.00	innorat
2016.02.01	03:00:00	11	m	61.7	30.2	26.69	poteca	0.01	a burat foarte putin in jur de 13.00	4 Ll + 4Tj, canta Cs, Ll, Tj, Ep					a plouat intre 18.00 - 20.00	innorat
2016.02.01	03:00:00	12	m	53.6	26	16.83	poteca	0.01	a burat foarte putin in jur de 13.00	4 Ll + 4Tj, canta Cs, Ll, Tj, Ep					a plouat intre 18.00 - 20.00	innorat
2016.02.01	03:00:00	13	m	62.8	32.4	24.7	ascuns in vegetatie	0.01	a burat foarte putin in jur de 13.00	4 Ll + 4Tj, canta Cs, Ll, Tj, Ep					a plouat intre 18.00 - 20.00	innorat
2016.02.01	03:00:00	14	m	61.5	31.7	24.64	ascuns in vegetatie	0.01	a burat foarte putin in jur de 13.00	4 Ll + 4Tj, canta Cs, Ll, Tj, Ep					a plouat intre 18.00 - 20.00	innorat
2016.02.01	03:00:00	15	m	61.7	30.2	23.26	ascuns in vegetatie	0.01	a burat foarte putin in jur de 13.00	4 Ll + 4Tj, canta Cs, Ll, Tj, Ep					a plouat intre 18.00 - 20.00	innorat
2016.02.02	05:00:00	1	m	59.9	30.3	24.93	ascuns in vegetatie	0.2	a plouat seara 18-20 (2016.02.01) si 14-15 (2016.02.02)	1 Tj + 2 Rm + 2 Ll, canta Ll + Tj +Tt			chiar aproape de casa, punctul de gps e gresit		a plouat intermitent incepand cu 17.00, dar nu si pe perioada transectului	innorat
2016.02.02	05:00:00	2	f	63.9	30.8	34.03	poteca	0.2	a plouat seara 18-20 (2016.02.01) si 14-15 (2016.02.02)	1 Tj + 2 Rm + 2 Ll, canta Ll + Tj +Tt					a plouat intermitent incepand cu 17.00, dar nu si pe perioada transectului	innorat
2016.02.02	05:00:00	3	f	54.2	27.8	16.24	ascuns in vegetatie	0.2	a plouat seara 18-20 (2016.02.01) si 14-15 (2016.02.02)	1 Tj + 2 Rm + 2 Ll, canta Ll + Tj +Tt					a plouat intermitent incepand cu 17.00, dar nu si pe perioada transectului	innorat
2016.02.02	05:00:00	4	m	61.8	30.9	29.49	poteca	0.2	a plouat seara 18-20 (2016.02.01) si 14-15 (2016.02.02)	1 Tj + 2 Rm + 2 Ll, canta Ll + Tj +Tt					a plouat intermitent incepand cu 17.00, dar nu si pe perioada transectului	innorat
2016.02.02	05:00:00	5	f	59.6	32.1	18.82	poteca	0.2	a plouat seara 18-20 (2016.02.01) si 14-15 (2016.02.02)	1 Tj + 2 Rm + 2 Ll, canta Ll + Tj +Tt					a plouat intermitent incepand cu 17.00, dar nu si pe perioada transectului	innorat
2016.02.02	05:00:00	6	f	59.6	29.5	21.67	poteca	0.2	a plouat seara 18-20 (2016.02.01) si 14-15 (2016.02.02)	1 Tj + 2 Rm + 2 Ll, canta Ll + Tj +Tt					a plouat intermitent incepand cu 17.00, dar nu si pe perioada transectului	innorat
2016.02.02	05:00:00	7	m	64.2	31.9	27.43	ascuns in vegetatie	0.2	a plouat seara 18-20 (2016.02.01) si 14-15 (2016.02.02)	1 Tj + 2 Rm + 2 Ll, canta Ll + Tj +Tt					a plouat intermitent incepand cu 17.00, dar nu si pe perioada transectului	innorat
2016.02.02	05:00:00	8						0.2	a plouat seara 18-20 (2016.02.01) si 14-15 (2016.02.02)	1 Tj + 2 Rm + 2 Ll, canta Ll + Tj +Tt			pierdut		a plouat intermitent incepand cu 17.00, dar nu si pe perioada transectului	innorat
2016.02.02	05:00:00	9	m	58.5	27.7	21.84	ascuns in vegetatie	0.2	a plouat seara 18-20 (2016.02.01) si 14-15 (2016.02.02)	1 Tj + 2 Rm + 2 Ll, canta Ll + Tj +Tt					a plouat intermitent incepand cu 17.00, dar nu si pe perioada transectului	innorat
2016.02.02	05:00:00	10	f	71	33.8	35.4	ascuns in vegetatie	0.2	a plouat seara 18-20 (2016.02.01) si 14-15 (2016.02.02)	1 Tj + 2 Rm + 2 Ll, canta Ll + Tj +Tt					a plouat intermitent incepand cu 17.00, dar nu si pe perioada transectului	innorat
2016.02.02	05:00:00	11	m	61.7	31.6	24.6	ascuns in vegetatie	0.2	a plouat seara 18-20 (2016.02.01) si 14-15 (2016.02.02)	1 Tj + 2 Rm + 2 Ll, canta Ll + Tj +Tt					a plouat intermitent incepand cu 17.00, dar nu si pe perioada transectului	innorat
2016.02.03	17:00:00							1	a plouat peste noapte	2Ll						innorat
2016.02.04	19:00:00	1	m	57.3	30.4	24.78	ascuns in vegetatie	0.5	a plouat putin noaptea pana dimineata	5 Ll, 3Tj, 1Ep, canta Tj, Tt, Ll, Ep						semi-innorat
2016.02.04	19:00:00	2	f	63.3	28.6	28.89	poteca	0.5	a plouat putin noaptea pana dimineata	5 Ll, 3Tj, 1Ep, canta Tj, Tt, Ll, Ep						semi-innorat
2016.02.04	19:00:00	3	m	57.5	27.3	23.92	poteca	0.5	a plouat putin noaptea pana dimineata	5 Ll, 3Tj, 1Ep, canta Tj, Tt, Ll, Ep						semi-innorat
2016.02.04	19:00:00	4	m	59.9	29.7	25.83	ascuns in vegetatie	0.5	a plouat putin noaptea pana dimineata	5 Ll, 3Tj, 1Ep, canta Tj, Tt, Ll, Ep						semi-innorat
2016.02.05	21:00:00	1	f	58	27.7	21.43	ascuns in vegetatie	0		6 Ll, 1 Tj, 2 Ep, canta Ll, Ep, Cs, TJ si Tt						innorat
2016.02.05	21:00:00	2	m	58.2	28.6	19.07	ascuns in vegetatie	0		6 Ll, 1 Tj, 2 Ep, canta Ll, Ep, Cs, TJ si Tt						innorat
2016.02.05	21:00:00	3	f	51.9	26.6	15.18	poteca	0		6 Ll, 1 Tj, 2 Ep, canta Ll, Ep, Cs, TJ si Tt						innorat
2016.02.05	21:00:00	4	f	52.2	27.5	17.96	ascuns in vegetatie	0		6 Ll, 1 Tj, 2 Ep, canta Ll, Ep, Cs, TJ si Tt						innorat
2016.02.05	21:00:00	5					ascuns in vegetatie	0		6 Ll, 1 Tj, 2 Ep, canta Ll, Ep, Cs, TJ si Tt			pierdut			innorat
2016.02.05	21:00:00	6	m	60.2	31.2	25.44	poteca	0		6 Ll, 1 Tj, 2 Ep, canta Ll, Ep, Cs, TJ si Tt						innorat
2016.02.05	21:00:00	7	f	62.9	31.6	31.79	ascuns in vegetatie	0		6 Ll, 1 Tj, 2 Ep, canta Ll, Ep, Cs, TJ si Tt						innorat
2016.02.05	21:00:00	8	f	67.8	31.5	35.81	poteca	0		6 Ll, 1 Tj, 2 Ep, canta Ll, Ep, Cs, TJ si Tt						innorat
2016.02.05	21:00:00	9	m	64.1	33	30.15	ascuns in vegetatie	0		6 Ll, 1 Tj, 2 Ep, canta Ll, Ep, Cs, TJ si Tt						innorat
2016.02.05	21:00:00	10	f	53.7	26.3	14.92	ascuns in vegetatie	0		6 Ll, 1 Tj, 2 Ep, canta Ll, Ep, Cs, TJ si Tt						innorat
2016.02.05	21:00:00	11	f	54.2	27.3	16.07	ascuns in vegetatie	0		6 Ll, 1 Tj, 2 Ep, canta Ll, Ep, Cs, TJ si Tt						innorat
2016.02.05	21:00:00	12	f	53.2	26.6	14.13	ascuns in vegetatie	0		6 Ll, 1 Tj, 2 Ep, canta Ll, Ep, Cs, TJ si Tt						innorat
2016.02.05	21:00:00	13	m	55.1	26.3	19.35	ascuns in vegetatie	0		6 Ll, 1 Tj, 2 Ep, canta Ll, Ep, Cs, TJ si Tt						innorat
2016.02.05	21:00:00	14	m	60.1	28.5	25.59	ascuns in vegetatie	0		6 Ll, 1 Tj, 2 Ep, canta Ll, Ep, Cs, TJ si Tt						innorat
2016.02.05	21:00:00	16	m	62	29.6	25.14	poteca	0		6 Ll, 1 Tj, 2 Ep, canta Ll, Ep, Cs, TJ si Tt						innorat
2016.02.05	21:00:00	17	m	55.7	26.9	17.77	poteca	0		6 Ll, 1 Tj, 2 Ep, canta Ll, Ep, Cs, TJ si Tt						innorat
2016.02.05	21:00:00	18	f	56.3	27.3	18.8	ascuns in vegetatie	0		6 Ll, 1 Tj, 2 Ep, canta Ll, Ep, Cs, TJ si Tt						innorat
2016.02.05	21:00:00	19	f	58.2	29.4	22.26	ascuns in vegetatie	0		6 Ll, 1 Tj, 2 Ep, canta Ll, Ep, Cs, TJ si Tt						innorat
2016.02.05	21:00:00	20	f	62.6	30.1	21.01	ascuns in vegetatie	0		6 Ll, 1 Tj, 2 Ep, canta Ll, Ep, Cs, TJ si Tt						innorat
2016.02.05	21:00:00	21	f	58.3	29.5	21.23	poteca	0		6 Ll, 1 Tj, 2 Ep, canta Ll, Ep, Cs, TJ si Tt						innorat
2016.02.05	21:00:00	22	f	59	31.5	20.07	ascuns in vegetatie	0		6 Ll, 1 Tj, 2 Ep, canta Ll, Ep, Cs, TJ si Tt						innorat
2016.02.06	23:00:00	1	m	55.9	27	21.01	ascuns in vegetatie	0		13 Ll + 3 Ep, canta Ep, Ll, Tj					a burat in jur de 19.00	senin
2016.02.06	23:00:00	2	f	57.4	32.2	19.26	ascuns in vegetatie	0		13 Ll + 3 Ep, canta Ep, Ll, Tj					a burat in jur de 19.00	senin
2016.02.06	23:00:00	3	f	53.9	27.2	16.92	ascuns in vegetatie	0		13 Ll + 3 Ep, canta Ep, Ll, Tj					a burat in jur de 19.00	senin
2016.02.06	23:00:00	4	f	51.2	25.2	15.34	poteca	0		13 Ll + 3 Ep, canta Ep, Ll, Tj					a burat in jur de 19.00	senin
2016.02.06	23:00:00	5	f	55.1	26.8	16.52	ascuns in vegetatie	0		13 Ll + 3 Ep, canta Ep, Ll, Tj					a burat in jur de 19.00	senin
2016.02.06	23:00:00	7	m	62.3	29.3	23.98	ascuns in vegetatie	0		13 Ll + 3 Ep, canta Ep, Ll, Tj					a burat in jur de 19.00	senin
2016.02.06	23:00:00	8	j	50.1	25.3	11.35	ascuns in vegetatie	0		13 Ll + 3 Ep, canta Ep, Ll, Tj			luat deget pt scheleto		a burat in jur de 19.00	senin
2016.02.06	23:00:00	9	f	55.5	28.3	17.31	ascuns in vegetatie	0		13 Ll + 3 Ep, canta Ep, Ll, Tj					a burat in jur de 19.00	senin
2016.02.06	23:00:00	10	f	63.9	31.7	25.96	poteca	0		13 Ll + 3 Ep, canta Ep, Ll, Tj					a burat in jur de 19.00	senin
2016.02.06	23:00:00	11	f	57.1	28.1	18.31	poteca	0		13 Ll + 3 Ep, canta Ep, Ll, Tj					a burat in jur de 19.00	senin
2016.02.06	23:00:00	12	m	58.8	28.3	24.19	poteca	0		13 Ll + 3 Ep, canta Ep, Ll, Tj					a burat in jur de 19.00	senin
2016.02.06	23:00:00	13	m	63.2	32	25.61	poteca	0		13 Ll + 3 Ep, canta Ep, Ll, Tj					a burat in jur de 19.00	senin
2016.02.06	23:00:00	14	m	62.6	30.1	28.5	poteca	0		13 Ll + 3 Ep, canta Ep, Ll, Tj			marcat		a burat in jur de 19.00	senin
2016.02.06	23:00:00	15	m	56.1	26.9	19.72	poteca	0		13 Ll + 3 Ep, canta Ep, Ll, Tj					a burat in jur de 19.00	senin
2016.02.06	23:00:00	16	m	62.1	29.7	26.85	poteca	0		13 Ll + 3 Ep, canta Ep, Ll, Tj					a burat in jur de 19.00	senin
2016.02.06	23:00:00	17	m	66.8	33.4	31.8	poteca	0		13 Ll + 3 Ep, canta Ep, Ll, Tj					a burat in jur de 19.00	senin
2016.02.06	23:00:00	18	m	63.6	30.5	25.39	ascuns in vegetatie	0		13 Ll + 3 Ep, canta Ep, Ll, Tj			marcat		a burat in jur de 19.00	senin
2016.02.06	23:00:00	19	f	62	29.7	25.64	poteca	0		13 Ll + 3 Ep, canta Ep, Ll, Tj					a burat in jur de 19.00	senin
2016.02.06	23:00:00	20	m	63.3	31.5	28.5	poteca	0		13 Ll + 3 Ep, canta Ep, Ll, Tj					a burat in jur de 19.00	senin
2016.02.06	23:00:00	21	m	61.9	30.7	22.16	poteca	0		13 Ll + 3 Ep, canta Ep, Ll, Tj					a burat in jur de 19.00	senin
2016.02.06	23:00:00	22	m	57.3	29.4	18.44	poteca	0		13 Ll + 3 Ep, canta Ep, Ll, Tj					a burat in jur de 19.00	senin
2016.02.07	01:00:00	1	f	64.6	31.4	30.33	poteca	0.01		14 Ll + 1 Tj + 6 Ep+ 2Rm, canta Ll, Tt, Ep					a plouat incepand cu 23.00, destul de tare la finalul transectului	innorat
2016.02.07	01:00:00	2	m	59.1	29.7	22.54	ascuns in vegetatie	0.01		14 Ll + 1 Tj + 6 Ep+ 2Rm, canta Ll, Tt, Ep					a plouat incepand cu 23.00, destul de tare la finalul transectului	innorat
2016.02.07	01:00:00	3	f	53.8	25.7	13.74	poteca	0.01		14 Ll + 1 Tj + 6 Ep+ 2Rm, canta Ll, Tt, Ep					a plouat incepand cu 23.00, destul de tare la finalul transectului	innorat
2016.02.07	01:00:00	4	f	56.9	28.9	17.53	poteca	0.01		14 Ll + 1 Tj + 6 Ep+ 2Rm, canta Ll, Tt, Ep					a plouat incepand cu 23.00, destul de tare la finalul transectului	innorat
2016.02.07	01:00:00	5	f	59.7	29.1	22.68	ascuns in vegetatie	0.01		14 Ll + 1 Tj + 6 Ep+ 2Rm, canta Ll, Tt, Ep					a plouat incepand cu 23.00, destul de tare la finalul transectului	innorat
2016.02.07	01:00:00	6	m	54.4	28.3	15.8	ascuns in vegetatie	0.01		14 Ll + 1 Tj + 6 Ep+ 2Rm, canta Ll, Tt, Ep					a plouat incepand cu 23.00, destul de tare la finalul transectului	innorat
2016.02.07	01:00:00	7	f	58.4	29.7	17.78	poteca	0.01		14 Ll + 1 Tj + 6 Ep+ 2Rm, canta Ll, Tt, Ep					a plouat incepand cu 23.00, destul de tare la finalul transectului	innorat
2016.02.07	01:00:00	8	f	59.5	31.6	20.01	ascuns in vegetatie	0.01		14 Ll + 1 Tj + 6 Ep+ 2Rm, canta Ll, Tt, Ep					a plouat incepand cu 23.00, destul de tare la finalul transectului	innorat
2016.02.07	01:00:00	9	f	60.4	31	18.98	poteca	0.01		14 Ll + 1 Tj + 6 Ep+ 2Rm, canta Ll, Tt, Ep					a plouat incepand cu 23.00, destul de tare la finalul transectului	innorat
2016.02.07	01:00:00	10	m	59.2	30.2	20.6	ascuns in vegetatie	0.01		14 Ll + 1 Tj + 6 Ep+ 2Rm, canta Ll, Tt, Ep					a plouat incepand cu 23.00, destul de tare la finalul transectului	innorat
2016.02.07	01:00:00	11	m	59.7	28.8	21.28	poteca	0.01		14 Ll + 1 Tj + 6 Ep+ 2Rm, canta Ll, Tt, Ep					a plouat incepand cu 23.00, destul de tare la finalul transectului	innorat
2016.02.07	01:00:00	12	m	56	29.7	18.78	poteca	0.01		14 Ll + 1 Tj + 6 Ep+ 2Rm, canta Ll, Tt, Ep					a plouat incepand cu 23.00, destul de tare la finalul transectului	innorat
2016.02.07	01:00:00	13	f	57.6	29.5	20.22	poteca	0.01		14 Ll + 1 Tj + 6 Ep+ 2Rm, canta Ll, Tt, Ep					a plouat incepand cu 23.00, destul de tare la finalul transectului	innorat
2016.02.07	01:00:00	14	f	56.1	27.8	17.71	poteca	0.01		14 Ll + 1 Tj + 6 Ep+ 2Rm, canta Ll, Tt, Ep					a plouat incepand cu 23.00, destul de tare la finalul transectului	innorat
2016.02.07	01:00:00	15	f	54.2	28.2	15.95	ascuns in vegetatie	0.01		14 Ll + 1 Tj + 6 Ep+ 2Rm, canta Ll, Tt, Ep					a plouat incepand cu 23.00, destul de tare la finalul transectului	innorat
2016.02.07	01:00:00	16	f	52.2				0.01		14 Ll + 1 Tj + 6 Ep+ 2Rm, canta Ll, Tt, Ep			manca un Leptodactylus, foto		a plouat incepand cu 23.00, destul de tare la finalul transectului	innorat
2016.02.07	01:00:00	18	m	58	27.8	19.15	ascuns in vegetatie	0.01		14 Ll + 1 Tj + 6 Ep+ 2Rm, canta Ll, Tt, Ep					a plouat incepand cu 23.00, destul de tare la finalul transectului	innorat
2016.02.07	01:00:00	19	f	62.5	29.9	25.03	ascuns in vegetatie	0.01		14 Ll + 1 Tj + 6 Ep+ 2Rm, canta Ll, Tt, Ep					a plouat incepand cu 23.00, destul de tare la finalul transectului	innorat
2016.02.07	01:00:00	20	m	60.3	30.4	23.98	ascuns in vegetatie	0.01		14 Ll + 1 Tj + 6 Ep+ 2Rm, canta Ll, Tt, Ep					a plouat incepand cu 23.00, destul de tare la finalul transectului	innorat
2016.02.07	01:00:00	21	j			9.11	ascuns in vegetatie	0.01		14 Ll + 1 Tj + 6 Ep+ 2Rm, canta Ll, Tt, Ep					a plouat incepand cu 23.00, destul de tare la finalul transectului	innorat
2016.02.07	01:00:00	22					poteca	0.01		14 Ll + 1 Tj + 6 Ep+ 2Rm, canta Ll, Tt, Ep			pierdut, transect oprit din cauza ploii		a plouat incepand cu 23.00, destul de tare la finalul transectului	innorat
2016.02.08								0.6		REPRODUCERE Tt si Cs				nu s-a facut transectul	a inceput sa ploua dupa-masa
2016.02.09								4.3	a plouat toata noaptea (8-9.02) si ziua (9.02)					nu s-a facut transectul	a plouat putin seara
2016.02.10	17:00:00	0						0.3							a burat chiar in timpul transectului	innorat
2016.02.11	19:00:00	1	m	58.1	30.2	20.16	amplex afara din apa; poteca	0.01	a plouat putin seara (10.02)	13 Ll, 1 Tt, canta Ll, cativa Tj, Ep					a plouat foarte putin in timpul transectului	innorat
2016.02.11	19:00:00	2	f	64.9	34.2	29.17	amplex afara din apa; poteca	0.01	a plouat putin seara (10.02)	13 Ll, 1 Tt, canta Ll, cativa Tj, Ep					a plouat foarte putin in timpul transectului	innorat
2016.02.11	19:00:00	3	m	63.6	32.7	24.23	poteca	0.01	a plouat putin seara (10.02)	13 Ll, 1 Tt, canta Ll, cativa Tj, Ep					a plouat foarte putin in timpul transectului	innorat
2016.02.11	19:00:00	4	m	59.3	29.2	20.27	poteca	0.01	a plouat putin seara (10.02)	13 Ll, 1 Tt, canta Ll, cativa Tj, Ep					a plouat foarte putin in timpul transectului	innorat
2016.02.11	19:00:00	5	f	54.3	26.3	14.06	poteca	0.01	a plouat putin seara (10.02)	13 Ll, 1 Tt, canta Ll, cativa Tj, Ep					a plouat foarte putin in timpul transectului	innorat
2016.02.11	19:00:00	6	m	54.6	27	16.99	poteca	0.01	a plouat putin seara (10.02)	13 Ll, 1 Tt, canta Ll, cativa Tj, Ep					a plouat foarte putin in timpul transectului	innorat
2016.02.11	19:00:00	7	f	59.7	26.7	22.36	poteca	0.01	a plouat putin seara (10.02)	13 Ll, 1 Tt, canta Ll, cativa Tj, Ep					a plouat foarte putin in timpul transectului	innorat
2016.02.11	19:00:00	8	m	57.1	31.6	23.56	ascuns in vegetatie	0.01	a plouat putin seara (10.02)	13 Ll, 1 Tt, canta Ll, cativa Tj, Ep					a plouat foarte putin in timpul transectului	innorat
2016.02.11	19:00:00	9	m			21.11	ascuns in vegetatie	0.01	a plouat putin seara (10.02)	13 Ll, 1 Tt, canta Ll, cativa Tj, Ep					a plouat foarte putin in timpul transectului	innorat
2016.02.11	19:00:00	10	m			18.75	poteca	0.01	a plouat putin seara (10.02)	13 Ll, 1 Tt, canta Ll, cativa Tj, Ep					a plouat foarte putin in timpul transectului	innorat
2016.02.11	19:00:00	11	f			25.34	ascuns in vegetatie	0.01	a plouat putin seara (10.02)	13 Ll, 1 Tt, canta Ll, cativa Tj, Ep					a plouat foarte putin in timpul transectului	innorat
2016.02.11	03:00:00	1	f	54.3	26.3	14.75	poteca	0.01	a plouat putin seara (10.02)	2 Ll + 1Tj, canta 2 Cs, Ep, Ll cativa Tj; primul metamorf de Ll					a plouat foarte putin in jur de 20.00	innorat
2016.02.11	03:00:00	2	m	63.3	33.7	28.24	poteca	0.01	a plouat putin seara (10.02)	2 Ll + 1Tj, canta 2 Cs, Ep, Ll cativa Tj; primul metamorf de Ll					a plouat foarte putin in jur de 20.00	innorat
2016.02.11	03:00:00	3	m	67.2	31.6	29.93	poteca	0.01	a plouat putin seara (10.02)	2 Ll + 1Tj, canta 2 Cs, Ep, Ll cativa Tj; primul metamorf de Ll					a plouat foarte putin in jur de 20.00	innorat
2016.02.11	03:00:00	4	f	61.7	31.8	25.95	poteca	0.01	a plouat putin seara (10.02)	2 Ll + 1Tj, canta 2 Cs, Ep, Ll cativa Tj; primul metamorf de Ll					a plouat foarte putin in jur de 20.00	innorat
2016.02.11	03:00:00	5	m	61.8	34.1	25.65	poteca	0.01	a plouat putin seara (10.02)	2 Ll + 1Tj, canta 2 Cs, Ep, Ll cativa Tj; primul metamorf de Ll					a plouat foarte putin in jur de 20.00	innorat
2016.02.11	03:00:00	6	f	68.5	34.3	28.71	poteca	0.01	a plouat putin seara (10.02)	2 Ll + 1Tj, canta 2 Cs, Ep, Ll cativa Tj; primul metamorf de Ll					a plouat foarte putin in jur de 20.00	innorat
2016.02.11	03:00:00	7	m	60.2	32.8	24.01	poteca	0.01	a plouat putin seara (10.02)	2 Ll + 1Tj, canta 2 Cs, Ep, Ll cativa Tj; primul metamorf de Ll					a plouat foarte putin in jur de 20.00	innorat
2016.02.11	03:00:00	8					poteca	0.01	a plouat putin seara (10.02)	2 Ll + 1Tj, canta 2 Cs, Ep, Ll cativa Tj; primul metamorf de Ll			pierdut		a plouat foarte putin in jur de 20.00	innorat
2016.02.11	03:00:00	9	m	58.9	29.1	23.09	poteca	0.01	a plouat putin seara (10.02)	2 Ll + 1Tj, canta 2 Cs, Ep, Ll cativa Tj; primul metamorf de Ll					a plouat foarte putin in jur de 20.00	innorat
2016.02.11	03:00:00	10	f	69.9	33.1	39.96	poteca	0.01	a plouat putin seara (10.02)	2 Ll + 1Tj, canta 2 Cs, Ep, Ll cativa Tj; primul metamorf de Ll					a plouat foarte putin in jur de 20.00	innorat
2016.02.11	03:00:00	11	j	50.5	26.4	11.54	poteca	0.01	a plouat putin seara (10.02)	2 Ll + 1Tj, canta 2 Cs, Ep, Ll cativa Tj; primul metamorf de Ll					a plouat foarte putin in jur de 20.00	innorat
2016.02.11	03:00:00	12	f	63.3	29.8	31.03	poteca	0.01	a plouat putin seara (10.02)	2 Ll + 1Tj, canta 2 Cs, Ep, Ll cativa Tj; primul metamorf de Ll					a plouat foarte putin in jur de 20.00	innorat
2016.02.11	03:00:00	13	m	60.2	27.1	23.91	ascuns in vegetatie	0.01	a plouat putin seara (10.02)	2 Ll + 1Tj, canta 2 Cs, Ep, Ll cativa Tj; primul metamorf de Ll					a plouat foarte putin in jur de 20.00	innorat
2016.02.11	03:00:00	14	m	61.2	29.6	25.17	ascuns in vegetatie	0.01	a plouat putin seara (10.02)	2 Ll + 1Tj, canta 2 Cs, Ep, Ll cativa Tj; primul metamorf de Ll					a plouat foarte putin in jur de 20.00	innorat
2016.02.12	21:00:00	1	m	59.6	29.1	23.55	ascuns in vegetatie	0.01	a plouat foarte putin seara (11.02)	2 Ll + 3tj, canta 1 Cs, Ep, Tj, Ll						80 % innorat
2016.02.12	21:00:00	2	f	60.8	29.7	25.41	ascuns in vegetatie	0.01	a plouat foarte putin seara (11.02)	2 Ll + 3tj, canta 1 Cs, Ep, Tj, Ll						80 % innorat
2016.02.12	21:00:00	3	m	60.3	29.1	23.26	ascuns in vegetatie	0.01	a plouat foarte putin seara (11.02)	2 Ll + 3tj, canta 1 Cs, Ep, Tj, Ll						80 % innorat
2016.02.12	21:00:00	4	f	73.7	34.3	39.18	ascuns in vegetatie	0.01	a plouat foarte putin seara (11.02)	2 Ll + 3tj, canta 1 Cs, Ep, Tj, Ll						80 % innorat
2016.02.12	21:00:00	5	f	54.1	27.8	18.63	ascuns in vegetatie	0.01	a plouat foarte putin seara (11.02)	2 Ll + 3tj, canta 1 Cs, Ep, Tj, Ll						80 % innorat
2016.02.12	21:00:00	6	m	58.9	30.7	22.11	poteca	0.01	a plouat foarte putin seara (11.02)	2 Ll + 3tj, canta 1 Cs, Ep, Tj, Ll						80 % innorat
2016.02.13	23:00:00	1	m	61.4	30.9	25.25	poteca	0		10 Ll, 2Tj, 1 Tt, canta Ll, Ep, Tj						60 % innorat
2016.02.13	23:00:00	2	m	57.8	27.5	20.4	poteca	0		10 Ll, 2Tj, 1 Tt, canta Ll, Ep, Tj						60 % innorat
2016.02.13	23:00:00	3	f	54.1	26.1	14.18	poteca	0		10 Ll, 2Tj, 1 Tt, canta Ll, Ep, Tj						60 % innorat
2016.02.13	23:00:00	4	f	57.8	28.9	21.69	ascuns in vegetatie	0		10 Ll, 2Tj, 1 Tt, canta Ll, Ep, Tj						60 % innorat
2016.02.13	23:00:00	5	f	64.8	33.4	34.68	ascuns in vegetatie	0		10 Ll, 2Tj, 1 Tt, canta Ll, Ep, Tj						60 % innorat
2016.02.13	23:00:00	6	f	58.2	28.4	18.62	poteca	0		10 Ll, 2Tj, 1 Tt, canta Ll, Ep, Tj						60 % innorat
2016.02.13	23:00:00	7	f	53.8	27	15.27	ascuns in vegetatie	0		10 Ll, 2Tj, 1 Tt, canta Ll, Ep, Tj						60 % innorat
2016.02.13	23:00:00	8	f	61.6	31.5	20.92	ascuns in vegetatie	0		10 Ll, 2Tj, 1 Tt, canta Ll, Ep, Tj						60 % innorat
2016.02.13	23:00:00	9	f	62.1	31.5	24.03	ascuns in vegetatie	0		10 Ll, 2Tj, 1 Tt, canta Ll, Ep, Tj						60 % innorat
2016.02.13	23:00:00	10	m	61.4	29.9	24.88	poteca	0		10 Ll, 2Tj, 1 Tt, canta Ll, Ep, Tj						60 % innorat
2016.02.13	23:00:00	11	m	54.1	28.1	16.63	ascuns in vegetatie	0		10 Ll, 2Tj, 1 Tt, canta Ll, Ep, Tj						60 % innorat
2016.02.13	23:00:00	12	f	67	33.6	35.72	ascuns in vegetatie	0		10 Ll, 2Tj, 1 Tt, canta Ll, Ep, Tj						60 % innorat
2016.02.13	23:00:00	13	m	57.2	31.8	22.93	poteca	0		10 Ll, 2Tj, 1 Tt, canta Ll, Ep, Tj						60 % innorat
2016.02.13	23:00:00	14	m	62.6	31.3	26.35	poteca	0		10 Ll, 2Tj, 1 Tt, canta Ll, Ep, Tj						60 % innorat
2016.02.13	23:00:00	15	m	57.2	29.7	24.01	ascuns in vegetatie	0		10 Ll, 2Tj, 1 Tt, canta Ll, Ep, Tj						60 % innorat
2016.02.13	23:00:00	16	m	57.7	29.1	22.84	ascuns in vegetatie	0		10 Ll, 2Tj, 1 Tt, canta Ll, Ep, Tj						60 % innorat
2016.02.13	23:00:00	17	m	61.1	31.3	27.29	poteca	0		10 Ll, 2Tj, 1 Tt, canta Ll, Ep, Tj						60 % innorat
2016.02.13	23:00:00	18	m	60.5	30.6	29.06	poteca	0		10 Ll, 2Tj, 1 Tt, canta Ll, Ep, Tj						60 % innorat
2016.02.13	23:00:00	19	f	61.4	28.7	21.88	poteca	0		10 Ll, 2Tj, 1 Tt, canta Ll, Ep, Tj						60 % innorat
2016.02.14	01:00:00	1	f	62.2	31.4	29.14	poteca	0		6Ll, 2 Ep, 1Tj; canta Tt, Ll, Ep, putini Tj					ploua 01.00 - 02.00	innorat
2016.02.14	01:00:00	2	f	62.3	31.3	25.57	poteca	0		6Ll, 2 Ep, 1Tj; canta Tt, Ll, Ep, putini Tj					ploua 01.00 - 02.00	innorat
2016.02.14	01:00:00	3	m	59.2	28.6	22.6	poteca	0		6Ll, 2 Ep, 1Tj; canta Tt, Ll, Ep, putini Tj					ploua 01.00 - 02.00	innorat
2016.02.14	01:00:00	4	f	63.7	31.6	25.7	poteca	0		6Ll, 2 Ep, 1Tj; canta Tt, Ll, Ep, putini Tj					ploua 01.00 - 02.00	innorat
2016.02.14	01:00:00	5	f	56.2	26.4	17.91	ascuns in vegetatie	0		6Ll, 2 Ep, 1Tj; canta Tt, Ll, Ep, putini Tj					ploua 01.00 - 02.00	innorat
2016.02.14	01:00:00	6	f	58.6	27	16.71	poteca	0		6Ll, 2 Ep, 1Tj; canta Tt, Ll, Ep, putini Tj					ploua 01.00 - 02.00	innorat
2016.02.14	01:00:00	7	f	64.1	31	30.78	poteca	0		6Ll, 2 Ep, 1Tj; canta Tt, Ll, Ep, putini Tj					ploua 01.00 - 02.00	innorat
2016.02.14	01:00:00	8	f	61.8	31.5	27.8	ascuns in vegetatie	0		6Ll, 2 Ep, 1Tj; canta Tt, Ll, Ep, putini Tj					ploua 01.00 - 02.00	innorat
2016.02.14	01:00:00	9	f	62.5	31.7	26.52	ascuns in vegetatie	0		6Ll, 2 Ep, 1Tj; canta Tt, Ll, Ep, putini Tj			manca un Ll (50.1, 17.6, 11.61) foto		ploua 01.00 - 02.00	innorat
2016.02.14	01:00:00	10	f	62.2	32.2	29.71	poteca	0		6Ll, 2 Ep, 1Tj; canta Tt, Ll, Ep, putini Tj					ploua 01.00 - 02.00	innorat
2016.02.14	01:00:00	11	f	56	28.9	22.06	poteca	0		6Ll, 2 Ep, 1Tj; canta Tt, Ll, Ep, putini Tj					ploua 01.00 - 02.00	innorat
2016.02.14	01:00:00	12	f	53.7	26.7	20.56	poteca	0		6Ll, 2 Ep, 1Tj; canta Tt, Ll, Ep, putini Tj					ploua 01.00 - 02.00	innorat
2016.02.14	01:00:00	13	m?	54.8	28.3	18.01	poteca	0		6Ll, 2 Ep, 1Tj; canta Tt, Ll, Ep, putini Tj					ploua 01.00 - 02.00	innorat
2016.02.14	01:00:00	14	m	58.3	29.6	20.7	poteca	0		6Ll, 2 Ep, 1Tj; canta Tt, Ll, Ep, putini Tj					ploua 01.00 - 02.00	innorat
2016.02.14	01:00:00	21	f	61.4	32.2	24.66	poteca	0		6Ll, 2 Ep, 1Tj; canta Tt, Ll, Ep, putini Tj			mandibula rupta		ploua 01.00 - 02.00	innorat
2016.02.14	01:00:00	22	m	61.6	31.4	23.35	ascuns in vegetatie	0		6Ll, 2 Ep, 1Tj; canta Tt, Ll, Ep, putini Tj					ploua 01.00 - 02.00	innorat
2016.02.14	01:00:00	23	f	62.9	29.4	25.53	ascuns in vegetatie	0		6Ll, 2 Ep, 1Tj; canta Tt, Ll, Ep, putini Tj					ploua 01.00 - 02.00	innorat
2016.02.14	01:00:00	24	f	63.3	31.8	30.04	ascuns in vegetatie	0		6Ll, 2 Ep, 1Tj; canta Tt, Ll, Ep, putini Tj					ploua 01.00 - 02.00	innorat
2016.02.14	01:00:00	25	m	62.7	29.5	24.74	ascuns in vegetatie	0		6Ll, 2 Ep, 1Tj; canta Tt, Ll, Ep, putini Tj					ploua 01.00 - 02.00	innorat
2016.02.14	01:00:00	26	m	61.6	29.8	23.5	ascuns in vegetatie	0		6Ll, 2 Ep, 1Tj; canta Tt, Ll, Ep, putini Tj					ploua 01.00 - 02.00	innorat
2016.02.14	01:00:00	27	f	64.5	33.9	30.94	ascuns in vegetatie	0		6Ll, 2 Ep, 1Tj; canta Tt, Ll, Ep, putini Tj					ploua 01.00 - 02.00	innorat
2016.02.15	03:00:00	1	m	55.3	27.8	16.06	poteca	0.2	a plouat in noaptea anterioara	6 Ll, 1 Tj, 1 Tt, canta Ll, Tt, Tj, Ep						innorat
2016.02.15	03:00:00	2	m	57.8	28.5	20.73	poteca	0.2	a plouat in noaptea anterioara	6 Ll, 1 Tj, 1 Tt, canta Ll, Tt, Tj, Ep						innorat
2016.02.15	03:00:00	3	m	59.4	28.2	22.28	ascuns in vegetatie	0.2	a plouat in noaptea anterioara	6 Ll, 1 Tj, 1 Tt, canta Ll, Tt, Tj, Ep						innorat
2016.02.15	03:00:00	4	f	58.4	30	20.24	poteca	0.2	a plouat in noaptea anterioara	6 Ll, 1 Tj, 1 Tt, canta Ll, Tt, Tj, Ep						innorat
2016.02.15	03:00:00	5	f	53.3	28.2	15.45	ascuns in vegetatie	0.2	a plouat in noaptea anterioara	6 Ll, 1 Tj, 1 Tt, canta Ll, Tt, Tj, Ep						innorat
2016.02.15	03:00:00	6	m	59.4	30.7	24.66	ascuns in vegetatie	0.2	a plouat in noaptea anterioara	6 Ll, 1 Tj, 1 Tt, canta Ll, Tt, Tj, Ep						innorat
2016.02.15	03:00:00	7	f	69.1	33.4	37.86	ascuns in vegetatie	0.2	a plouat in noaptea anterioara	6 Ll, 1 Tj, 1 Tt, canta Ll, Tt, Tj, Ep						innorat
2016.02.15	03:00:00	8	m	62.8	31.7	23.73	ascuns in vegetatie	0.2	a plouat in noaptea anterioara	6 Ll, 1 Tj, 1 Tt, canta Ll, Tt, Tj, Ep						innorat
2016.02.15	03:00:00	9	m	62.9	29.3	26.05	ascuns in vegetatie	0.2	a plouat in noaptea anterioara	6 Ll, 1 Tj, 1 Tt, canta Ll, Tt, Tj, Ep						innorat
2016.02.15	03:00:00	10	f	63.4	28.9	23.57	poteca	0.2	a plouat in noaptea anterioara	6 Ll, 1 Tj, 1 Tt, canta Ll, Tt, Tj, Ep						innorat
2016.02.15	03:00:00	11	f	77.8	35.7	51.26	poteca	0.2	a plouat in noaptea anterioara	6 Ll, 1 Tj, 1 Tt, canta Ll, Tt, Tj, Ep						innorat
2016.02.16								0						nu s-a facut transectul	ploua 20.00
2016.02.17	05:00:00	1	f	64.1	32.1	27.38	poteca	0.1	a plouat in seara anterioara	2 Ll, 2 Tj, 2 Rm, canta Tj, Ll						50% innorat
2016.02.17	05:00:00	2	f	55.4	28.8	18.73	poteca	0.1	a plouat in seara anterioara	2 Ll, 2 Tj, 2 Rm, canta Tj, Ll						50% innorat
2016.02.17	05:00:00	3	m	62.2	29.8	22.19	poteca	0.1	a plouat in seara anterioara	2 Ll, 2 Tj, 2 Rm, canta Tj, Ll						50% innorat
2016.02.17	05:00:00	4	m	64.3	31.8	27.02	ascuns in vegetatie	0.1	a plouat in seara anterioara	2 Ll, 2 Tj, 2 Rm, canta Tj, Ll						50% innorat
2016.02.17	05:00:00	5					ascuns in vegetatie	0.1	a plouat in seara anterioara	2 Ll, 2 Tj, 2 Rm, canta Tj, Ll			pierdut			50% innorat
2016.02.18	17:00:00	0						0		1 Rm						80% innorat
2016.02.19	19:00:00	1	f	53.2	27.9	15.67	ascuns in vegetatie	0.8	a plouat in noaptea anterioara (23.00)	2 Ll, 1 Tj, canta Ep, Ll						innorat
2016.02.20	21:00:00	1	m	58.6	27.9	20.27	ascuns in vegetatie	0.1	a plouat in noaptea anterioara	8 Ll, 2 Tj, canta Tj, Tt
2016.02.20	21:00:00	2	f	53.4	27.2	13.85	poteca	0.1	a plouat in noaptea anterioara	8 Ll, 2 Tj, canta Tj, Tt
2016.02.20	21:00:00	3	m	62.6	29.8	28.71	ascuns in vegetatie	0.1	a plouat in noaptea anterioara	8 Ll, 2 Tj, canta Tj, Tt			marcat
2016.02.20	21:00:00	4	f	53.7	26.8	15.7	ascuns in vegetatie	0.1	a plouat in noaptea anterioara	8 Ll, 2 Tj, canta Tj, Tt
2016.02.21	23:00:00	1	f	58.7	29.8	24.85	poteca	0		6 Ll, 1 Tj, canta Ll, Ep, Tj, Tt					a plouat intre 21:00 - 22:00	innorat, dar se vede lumina de la luna
2016.02.21	23:00:00	2	f	61.4	30.1	24.9	poteca	0		7 Ll, 1 Tj, canta Ll, Ep, Tj, Tt					a plouat intre 21:00 - 22:00	innorat, dar se vede lumina de la luna
2016.02.21	23:00:00	3	m	59.3	29.4	23.77	ascuns in vegetatie	0		8 Ll, 1 Tj, canta Ll, Ep, Tj, Tt					a plouat intre 21:00 - 22:00	innorat, dar se vede lumina de la luna
2016.02.21	23:00:00	4	f	63.5	29.7	26.81	ascuns in vegetatie	0		9 Ll, 1 Tj, canta Ll, Ep, Tj, Tt					a plouat intre 21:00 - 22:00	innorat, dar se vede lumina de la luna
2016.02.21	23:00:00	5	m	61.4	30.2	21.7	ascuns in vegetatie	0		10 Ll, 1 Tj, canta Ll, Ep, Tj, Tt					a plouat intre 21:00 - 22:00	innorat, dar se vede lumina de la luna
2016.02.21	23:00:00	6	m	61.8	29.2	25.13	ascuns in vegetatie	0		11 Ll, 1 Tj, canta Ll, Ep, Tj, Tt			marcat		a plouat intre 21:00 - 22:00	innorat, dar se vede lumina de la luna
2016.02.21	23:00:00	7	m	61.5	31.1	22.25	poteca	0		12 Ll, 1 Tj, canta Ll, Ep, Tj, Tt					a plouat intre 21:00 - 22:00	innorat, dar se vede lumina de la luna
2016.02.21	23:00:00	8	m	55.7	28.5	19.55	poteca	0		13 Ll, 1 Tj, canta Ll, Ep, Tj, Tt					a plouat intre 21:00 - 22:00	innorat, dar se vede lumina de la luna
2016.02.21	23:00:00	9	m	56.2	29.2	21.17	ascuns in vegetatie	0		14 Ll, 1 Tj, canta Ll, Ep, Tj, Tt					a plouat intre 21:00 - 22:00	innorat, dar se vede lumina de la luna
2016.02.21	23:00:00	10					ascuns in vegetatie	0		15 Ll, 1 Tj, canta Ll, Ep, Tj, Tt			pierdut		a plouat intre 21:00 - 22:00	innorat, dar se vede lumina de la luna
2016.02.21	23:00:00	11	m	63.2	29	24.44	poteca	0		16 Ll, 1 Tj, canta Ll, Ep, Tj, Tt					a plouat intre 21:00 - 22:00	innorat, dar se vede lumina de la luna
2016.02.21	23:00:00	12	m	58.1	29.4	25.5	ascuns in vegetatie	0		17 Ll, 1 Tj, canta Ll, Ep, Tj, Tt					a plouat intre 21:00 - 22:00	innorat, dar se vede lumina de la luna
2016.02.21	23:00:00	13	f	66.1	30.2	32.19	ascuns in vegetatie	0		18 Ll, 1 Tj, canta Ll, Ep, Tj, Tt					a plouat intre 21:00 - 22:00	innorat, dar se vede lumina de la luna
2016.02.21	23:00:00	14	f	62.1	30.8	29.57	poteca	0		19 Ll, 1 Tj, canta Ll, Ep, Tj, Tt					a plouat intre 21:00 - 22:00	innorat, dar se vede lumina de la luna
2016.02.22	01:00:00	1	m	61.8	29.2	24.19	poteca	0.3	a plouat in noaptea anterioara	3 Ll, 3 Tj, 1Tt, canta Ll, Tt, Ep					a plouat f putin intre 21:00-22:00	80 % innorat, lumina puternica de la luna
2016.02.22	01:00:00	3	f	67.3	31.7	33.21	ascuns in vegetatie	0.3	a plouat in noaptea anterioara	3 Ll, 3 Tj, 1Tt, canta Ll, Tt, Ep					a plouat f putin intre 21:00-22:00	80 % innorat, lumina puternica de la luna
2016.02.23	03:00:00	1	f	59.6	29.1	21.51	ascuns in vegetatie	0.01	a plouat f putin in noaptea anterioara	2 Ll, 2 Tj, canta cativa Ll						80 % innorat, lumina puternica de la luna
2016.02.23	03:00:00	2	f	61.7	28.4	23.74	ascuns in vegetatie	0.01	a plouat f putin in noaptea anterioara	2 Ll, 2 Tj, canta cativa Ll			marcat			80 % innorat, lumina puternica de la luna
2016.02.24	05:00:00	1	f	62.4	30.2	24.59	ascuns in vegetatie	0		reproducere CS si Tj!!! Canta si Ep si Ll, 2 Rm					a plouat puternic intre 17:00 si 02:00	innorat, dar se vede lumina de la luna	portiunea de transect intre sosea si capcana 1 este inundata
2016.02.24	05:00:00	2	f	65.6	34.3	30.56	ascuns in vegetatie	0		reproducere CS si Tj!!! Canta si Ep si Ll, 2 Rm					a plouat puternic intre 17:00 si 02:00	innorat, dar se vede lumina de la luna	portiunea de transect intre sosea si capcana 1 este inundata
2016.02.24	05:00:00	3					ascuns in vegetatie	0		reproducere CS si Tj!!! Canta si Ep si Ll, 2 Rm			pierdut		a plouat puternic intre 17:00 si 02:00	innorat, dar se vede lumina de la luna	portiunea de transect intre sosea si capcana 1 este inundata
2016.02.24	05:00:00	4	m	61.8	31	25.87	poteca	0		reproducere CS si Tj!!! Canta si Ep si Ll, 2 Rm					a plouat puternic intre 17:00 si 02:00	innorat, dar se vede lumina de la luna	portiunea de transect intre sosea si capcana 1 este inundata
2016.02.24	05:00:00	5	m	64.5	32.6	27.76	poteca	0		reproducere CS si Tj!!! Canta si Ep si Ll, 2 Rm					a plouat puternic intre 17:00 si 02:00	innorat, dar se vede lumina de la luna	portiunea de transect intre sosea si capcana 1 este inundata
2016.02.24	05:00:00	6	m	61.4	29.1	21.95	poteca	0		reproducere CS si Tj!!! Canta si Ep si Ll, 2 Rm					a plouat puternic intre 17:00 si 02:00	innorat, dar se vede lumina de la luna	portiunea de transect intre sosea si capcana 1 este inundata
2016.02.24	05:00:00	7	m	59.8	28.5	21.66	poteca	0		reproducere CS si Tj!!! Canta si Ep si Ll, 2 Rm			marcat		a plouat puternic intre 17:00 si 02:00	innorat, dar se vede lumina de la luna	portiunea de transect intre sosea si capcana 1 este inundata
2016.02.24	05:00:00	8	m	56.7	27.9	18.77	poteca	0		reproducere CS si Tj!!! Canta si Ep si Ll, 2 Rm					a plouat puternic intre 17:00 si 02:00	innorat, dar se vede lumina de la luna	portiunea de transect intre sosea si capcana 1 este inundata
2016.02.24	05:00:00	9	m	61.8	30.7	23.75	poteca	0		reproducere CS si Tj!!! Canta si Ep si Ll, 2 Rm					a plouat puternic intre 17:00 si 02:00	innorat, dar se vede lumina de la luna	portiunea de transect intre sosea si capcana 1 este inundata
2016.02.24	05:00:00	10					amplex	0		reproducere CS si Tj!!! Canta si Ep si Ll, 2 Rm					a plouat puternic intre 17:00 si 02:00	innorat, dar se vede lumina de la luna	portiunea de transect intre sosea si capcana 1 este inundata
2016.02.24	05:00:00	11	f	54.4	27	14.37	ascuns in vegetatie	0		reproducere CS si Tj!!! Canta si Ep si Ll, 2 Rm			manca un Ll		a plouat puternic intre 17:00 si 02:00	innorat, dar se vede lumina de la luna	portiunea de transect intre sosea si capcana 1 este inundata
2016.02.25	17:00:00	0						3.8	a plouat toata noaptea	canta Tj si Tt						50% innorat	portiunea de transect intre sosea si capcana 1 este inundata
2016.02.26	19:00:00	1	m	63.4	28.4	29.76	ascuns in vegetatie	10.5	a plouat toata noaptea 25-26.02	canta Tj, Tt, Ep, Cs, Ll, Sq						innorat	portiunea de transect intre sosea si capcana 1 este inundata
2016.02.26	19:00:00	2	m	63.3	31.2	24.7	poteca	10.5	a plouat toata noaptea	canta Tj, Tt, Ep, Cs, Ll, Sq						innorat	portiunea de transect intre sosea si capcana 1 este inundata
2016.02.26	19:00:00	3	m	58.6	29.8	20.47	poteca	10.5	a plouat toata noaptea	canta Tj, Tt, Ep, Cs, Ll, Sq						innorat	portiunea de transect intre sosea si capcana 1 este inundata
2016.02.26	19:00:00	4	f	67.2	32.7	29.74	poteca	10.5	a plouat toata noaptea	canta Tj, Tt, Ep, Cs, Ll, Sq						innorat	portiunea de transect intre sosea si capcana 1 este inundata
2016.02.26	19:00:00	5	m	61.5	29.7	24.11	poteca	10.5	a plouat toata noaptea	canta Tj, Tt, Ep, Cs, Ll, Sq						innorat	portiunea de transect intre sosea si capcana 1 este inundata
2016.02.26	19:00:00	6					ascuns in vegetatie	10.5	a plouat toata noaptea	canta Tj, Tt, Ep, Cs, Ll, Sq			pierdut			innorat	portiunea de transect intre sosea si capcana 1 este inundata
2016.02.26	19:00:00	7	m	59.4	28.4	18.29	poteca	10.5	a plouat toata noaptea	canta Tj, Tt, Ep, Cs, Ll, Sq			marcat			innorat	portiunea de transect intre sosea si capcana 1 este inundata
2016.02.26	19:00:00	8	f	66.1	31.5	26.51	poteca	10.5	a plouat toata noaptea	canta Tj, Tt, Ep, Cs, Ll, Sq						innorat	portiunea de transect intre sosea si capcana 1 este inundata
2016.02.26	19:00:00	9	m	61.8	31.5	26.94	poteca	10.5	a plouat toata noaptea	canta Tj, Tt, Ep, Cs, Ll, Sq						innorat	portiunea de transect intre sosea si capcana 1 este inundata
2016.02.26	19:00:00	10	m	58.6	30.8	28.7	ascuns in vegetatie	10.5	a plouat toata noaptea	canta Tj, Tt, Ep, Cs, Ll, Sq						innorat	portiunea de transect intre sosea si capcana 1 este inundata
2016.02.26	19:00:00	11	m	64.5	31.9	35.85	poteca	10.5	a plouat toata noaptea	canta Tj, Tt, Ep, Cs, Ll, Sq						innorat	portiunea de transect intre sosea si capcana 1 este inundata
2016.02.26	19:00:00	12	f	67.4	33.4	30.06	poteca	10.5	a plouat toata noaptea	canta Tj, Tt, Ep, Cs, Ll, Sq						innorat	portiunea de transect intre sosea si capcana 1 este inundata
2016.02.26	19:00:00	13	m	61.6	29	23.4	poteca	10.5	a plouat toata noaptea	canta Tj, Tt, Ep, Cs, Ll, Sq			marcat			innorat	portiunea de transect intre sosea si capcana 1 este inundata
2016.02.26	19:00:00	14	m	62.7	30.8	23.59	poteca	10.5	a plouat toata noaptea	canta Tj, Tt, Ep, Cs, Ll, Sq			marcat			innorat	portiunea de transect intre sosea si capcana 1 este inundata
2016.02.26	19:00:00	15	m	56.6	27.3	17.34	poteca	10.5	a plouat toata noaptea	canta Tj, Tt, Ep, Cs, Ll, Sq						innorat	portiunea de transect intre sosea si capcana 1 este inundata
2016.02.26	19:00:00	16	m	56.3	28.6	18.24	poteca	10.5	a plouat toata noaptea	canta Tj, Tt, Ep, Cs, Ll, Sq						innorat	portiunea de transect intre sosea si capcana 1 este inundata
2016.02.26	19:00:00	17	m	57.3	28.6	18.79	poteca	10.5	a plouat toata noaptea	canta Tj, Tt, Ep, Cs, Ll, Sq						innorat	portiunea de transect intre sosea si capcana 1 este inundata
2016.02.26	19:00:00	18	m	61.8	28.6	21.33	poteca	10.5	a plouat toata noaptea	canta Tj, Tt, Ep, Cs, Ll, Sq						innorat	portiunea de transect intre sosea si capcana 1 este inundata
2016.02.26	19:00:00	19	m	61.9	29.7	26.17	poteca	10.5	a plouat toata noaptea	canta Tj, Tt, Ep, Cs, Ll, Sq						innorat	portiunea de transect intre sosea si capcana 1 este inundata
2016.02.26	19:00:00	20	f	68.3	32.7	25.29	ascuns in vegetatie	10.5	a plouat toata noaptea	canta Tj, Tt, Ep, Cs, Ll, Sq						innorat	portiunea de transect intre sosea si capcana 1 este inundata
2016.02.26	19:00:00	21						10.5	a plouat toata noaptea	canta Tj, Tt, Ep, Cs, Ll, Sq			pierdut			innorat	portiunea de transect intre sosea si capcana 1 este inundata
2016.02.26	19:00:00	22	m	64.4	29.8	27.64	ascuns in vegetatie	10.5	a plouat toata noaptea	canta Tj, Tt, Ep, Cs, Ll, Sq						innorat	portiunea de transect intre sosea si capcana 1 este inundata
2016.02.26	19:00:00	23	m	56.1	27.2	20.21	ascuns in vegetatie	10.5	a plouat toata noaptea	canta Tj, Tt, Ep, Cs, Ll, Sq						innorat	portiunea de transect intre sosea si capcana 1 este inundata
2016.02.26	19:00:00	24	m	59.1	29.2	21.14	poteca	10.5	a plouat toata noaptea	canta Tj, Tt, Ep, Cs, Ll, Sq						innorat	portiunea de transect intre sosea si capcana 1 este inundata
2016.02.26	19:00:00	25	m	61.6	29.5	20.98	ascuns in vegetatie	10.5	a plouat toata noaptea	canta Tj, Tt, Ep, Cs, Ll, Sq						innorat	portiunea de transect intre sosea si capcana 1 este inundata
2016.02.26	19:00:00	26	m	59.7	28.6	23.9	poteca	10.5	a plouat toata noaptea	canta Tj, Tt, Ep, Cs, Ll, Sq						innorat	portiunea de transect intre sosea si capcana 1 este inundata
2016.02.26	19:00:00	27	m	57.2	29	20.02	poteca	10.5	a plouat toata noaptea	canta Tj, Tt, Ep, Cs, Ll, Sq						innorat	portiunea de transect intre sosea si capcana 1 este inundata
2016.02.26	19:00:00	29	m	60.5	31.4	21.22	poteca	10.5	a plouat toata noaptea	canta Tj, Tt, Ep, Cs, Ll, Sq						innorat	portiunea de transect intre sosea si capcana 1 este inundata
2016.02.26	19:00:00	30	m	61.9	29.5	26.12	poteca	10.5	a plouat toata noaptea	canta Tj, Tt, Ep, Cs, Ll, Sq						innorat	portiunea de transect intre sosea si capcana 1 este inundata
2016.02.26	19:00:00	31	f	65.3	30.5	33.31	poteca	10.5	a plouat toata noaptea	canta Tj, Tt, Ep, Cs, Ll, Sq						innorat	portiunea de transect intre sosea si capcana 1 este inundata
2016.02.26	19:00:00	32	m	55.7	28.2	20.38	poteca	10.5	a plouat toata noaptea	canta Tj, Tt, Ep, Cs, Ll, Sq						innorat	portiunea de transect intre sosea si capcana 1 este inundata
2016.02.26	19:00:00	33	m	61.9	27.3	25.45	poteca	10.5	a plouat toata noaptea	canta Tj, Tt, Ep, Cs, Ll, Sq						innorat	portiunea de transect intre sosea si capcana 1 este inundata
2016.02.26	19:00:00	34	m	57.2	28.2	25.47	poteca	10.5	a plouat toata noaptea	canta Tj, Tt, Ep, Cs, Ll, Sq						innorat	portiunea de transect intre sosea si capcana 1 este inundata
2016.02.26	19:00:00	35	f	55.3	26.6	19.81	ascuns in vegetatie	10.5	a plouat toata noaptea	canta Tj, Tt, Ep, Cs, Ll, Sq						innorat	portiunea de transect intre sosea si capcana 1 este inundata
2016.02.26	19:00:00	36						10.5	a plouat toata noaptea	canta Tj, Tt, Ep, Cs, Ll, Sq			pierdut			innorat	portiunea de transect intre sosea si capcana 1 este inundata
2016.02.26	19:00:00	37	f	61.9	32.2	28.83	ascuns in vegetatie	10.5	a plouat toata noaptea	canta Tj, Tt, Ep, Cs, Ll, Sq						innorat	portiunea de transect intre sosea si capcana 1 este inundata
2016.02.26	19:00:00	39	m	66.2	30.8	21.95	poteca	10.5	a plouat toata noaptea	canta Tj, Tt, Ep, Cs, Ll, Sq			nu are mana dreapta			innorat	portiunea de transect intre sosea si capcana 1 este inundata
2016.02.26	19:00:00	40	m	59.5	29.4	26.26	ascuns in vegetatie	10.5	a plouat toata noaptea	canta Tj, Tt, Ep, Cs, Ll, Sq						innorat	portiunea de transect intre sosea si capcana 1 este inundata
2016.02.26	19:00:00	41	m	61.7	29.2	24.37	ascuns in vegetatie	10.5	a plouat toata noaptea	canta Tj, Tt, Ep, Cs, Ll, Sq						innorat	portiunea de transect intre sosea si capcana 1 este inundata
2016.02.26	19:00:00	42					ascuns in vegetatie	10.5	a plouat toata noaptea	canta Tj, Tt, Ep, Cs, Ll, Sq			pierdut			innorat	portiunea de transect intre sosea si capcana 1 este inundata
2016.02.26	19:00:00	43	f	57.9	26.5	20.47	ascuns in vegetatie	10.5	a plouat toata noaptea	canta Tj, Tt, Ep, Cs, Ll, Sq						innorat	portiunea de transect intre sosea si capcana 1 este inundata
2016.02.26	19:00:00	44	f	64.3	30	29.07	ascuns in vegetatie	10.5	a plouat toata noaptea	canta Tj, Tt, Ep, Cs, Ll, Sq						innorat	portiunea de transect intre sosea si capcana 1 este inundata
2016.02.27								0						nu s-a facut transectul			portiunea de transect intre sosea si capcana 1 este inundata
2016.02.28	21:00:00	1	f	68.5			poteca	1.2	a plouat noaptea si dimineata	5 Ll, 6 Tj, 2 Ep, 2 Tt, canta Cs, Tt, Tj, Ll, Ep, Sq				din cauza ploii, nu s-au fotografiat si cantarit animalele	ploua puternic pe timpul transectului	innorat	portiunea de transect intre sosea si capcana 1 este inundata
2016.02.28	21:00:00	2	m	62.7			poteca	1.2	a plouat noaptea si dimineata	5 Ll, 6 Tj, 2 Ep, 2 Tt, canta Cs, Tt, Tj, Ll, Ep, Sq				din cauza ploii, nu s-au fotografiat si cantarit animalele	ploua puternic pe timpul transectului	innorat	portiunea de transect intre sosea si capcana 1 este inundata
2016.02.28	21:00:00	3	f	58.5			poteca	1.2	a plouat noaptea si dimineata	5 Ll, 6 Tj, 2 Ep, 2 Tt, canta Cs, Tt, Tj, Ll, Ep, Sq				din cauza ploii, nu s-au fotografiat si cantarit animalele	ploua puternic pe timpul transectului	innorat	portiunea de transect intre sosea si capcana 1 este inundata
2016.02.28	21:00:00	4	f	61.7			poteca	1.2	a plouat noaptea si dimineata	5 Ll, 6 Tj, 2 Ep, 2 Tt, canta Cs, Tt, Tj, Ll, Ep, Sq				din cauza ploii, nu s-au fotografiat si cantarit animalele	ploua puternic pe timpul transectului	innorat	portiunea de transect intre sosea si capcana 1 este inundata
2016.02.28	21:00:00	5	m	58.6			poteca	1.2	a plouat noaptea si dimineata	5 Ll, 6 Tj, 2 Ep, 2 Tt, canta Cs, Tt, Tj, Ll, Ep, Sq				din cauza ploii, nu s-au fotografiat si cantarit animalele	ploua puternic pe timpul transectului	innorat	portiunea de transect intre sosea si capcana 1 este inundata
2016.02.28	21:00:00	6	f	62.2			poteca	1.2	a plouat noaptea si dimineata	5 Ll, 6 Tj, 2 Ep, 2 Tt, canta Cs, Tt, Tj, Ll, Ep, Sq				din cauza ploii, nu s-au fotografiat si cantarit animalele	ploua puternic pe timpul transectului	innorat	portiunea de transect intre sosea si capcana 1 este inundata
2016.02.28	21:00:00	7	m	65.6			poteca	1.2	a plouat noaptea si dimineata	5 Ll, 6 Tj, 2 Ep, 2 Tt, canta Cs, Tt, Tj, Ll, Ep, Sq				din cauza ploii, nu s-au fotografiat si cantarit animalele	ploua puternic pe timpul transectului	innorat	portiunea de transect intre sosea si capcana 1 este inundata
2016.02.28	21:00:00	8	m	59.5			poteca	1.2	a plouat noaptea si dimineata	5 Ll, 6 Tj, 2 Ep, 2 Tt, canta Cs, Tt, Tj, Ll, Ep, Sq				din cauza ploii, nu s-au fotografiat si cantarit animalele	ploua puternic pe timpul transectului	innorat	portiunea de transect intre sosea si capcana 1 este inundata
2016.02.28	21:00:00	9	f	64.8			poteca	1.2	a plouat noaptea si dimineata	5 Ll, 6 Tj, 2 Ep, 2 Tt, canta Cs, Tt, Tj, Ll, Ep, Sq				din cauza ploii, nu s-au fotografiat si cantarit animalele	ploua puternic pe timpul transectului	innorat	portiunea de transect intre sosea si capcana 1 este inundata
2016.02.28	21:00:00	10	m	62.7			poteca	1.2	a plouat noaptea si dimineata	5 Ll, 6 Tj, 2 Ep, 2 Tt, canta Cs, Tt, Tj, Ll, Ep, Sq				din cauza ploii, nu s-au fotografiat si cantarit animalele	ploua puternic pe timpul transectului	innorat	portiunea de transect intre sosea si capcana 1 este inundata
2016.02.28	21:00:00	11	f	66.1			poteca	1.2	a plouat noaptea si dimineata	5 Ll, 6 Tj, 2 Ep, 2 Tt, canta Cs, Tt, Tj, Ll, Ep, Sq				din cauza ploii, nu s-au fotografiat si cantarit animalele	ploua puternic pe timpul transectului	innorat	portiunea de transect intre sosea si capcana 1 este inundata
2016.02.28	21:00:00	14	j	54.6			poteca	1.2	a plouat noaptea si dimineata	5 Ll, 6 Tj, 2 Ep, 2 Tt, canta Cs, Tt, Tj, Ll, Ep, Sq				din cauza ploii, nu s-au fotografiat si cantarit animalele	ploua puternic pe timpul transectului	innorat	portiunea de transect intre sosea si capcana 1 este inundata
2016.02.28	21:00:00	15	f	57.7			poteca	1.2	a plouat noaptea si dimineata	5 Ll, 6 Tj, 2 Ep, 2 Tt, canta Cs, Tt, Tj, Ll, Ep, Sq				din cauza ploii, nu s-au fotografiat si cantarit animalele	ploua puternic pe timpul transectului	innorat	portiunea de transect intre sosea si capcana 1 este inundata
2016.02.28	21:00:00	16	m	58.9			poteca	1.2	a plouat noaptea si dimineata	5 Ll, 6 Tj, 2 Ep, 2 Tt, canta Cs, Tt, Tj, Ll, Ep, Sq				din cauza ploii, nu s-au fotografiat si cantarit animalele	ploua puternic pe timpul transectului	innorat	portiunea de transect intre sosea si capcana 1 este inundata
2016.02.28	21:00:00	17	f	65.5			poteca	1.2	a plouat noaptea si dimineata	5 Ll, 6 Tj, 2 Ep, 2 Tt, canta Cs, Tt, Tj, Ll, Ep, Sq				din cauza ploii, nu s-au fotografiat si cantarit animalele	ploua puternic pe timpul transectului	innorat	portiunea de transect intre sosea si capcana 1 este inundata
2016.02.28	21:00:00	18	f	62.2			poteca	1.2	a plouat noaptea si dimineata	5 Ll, 6 Tj, 2 Ep, 2 Tt, canta Cs, Tt, Tj, Ll, Ep, Sq				din cauza ploii, nu s-au fotografiat si cantarit animalele	ploua puternic pe timpul transectului	innorat	portiunea de transect intre sosea si capcana 1 este inundata
2016.02.28	21:00:00	19	m	63.6			poteca	1.2	a plouat noaptea si dimineata	5 Ll, 6 Tj, 2 Ep, 2 Tt, canta Cs, Tt, Tj, Ll, Ep, Sq				din cauza ploii, nu s-au fotografiat si cantarit animalele	ploua puternic pe timpul transectului	innorat	portiunea de transect intre sosea si capcana 1 este inundata
2016.02.28	21:00:00	20	f	62.1			poteca	1.2	a plouat noaptea si dimineata	5 Ll, 6 Tj, 2 Ep, 2 Tt, canta Cs, Tt, Tj, Ll, Ep, Sq				din cauza ploii, nu s-au fotografiat si cantarit animalele	ploua puternic pe timpul transectului	innorat	portiunea de transect intre sosea si capcana 1 este inundata
2016.02.28	21:00:00	21	m	62.7			poteca	1.2	a plouat noaptea si dimineata	5 Ll, 6 Tj, 2 Ep, 2 Tt, canta Cs, Tt, Tj, Ll, Ep, Sq				din cauza ploii, nu s-au fotografiat si cantarit animalele	ploua puternic pe timpul transectului	innorat	portiunea de transect intre sosea si capcana 1 este inundata
2016.02.28	21:00:00	22	m	66.1			poteca	1.2	a plouat noaptea si dimineata	5 Ll, 6 Tj, 2 Ep, 2 Tt, canta Cs, Tt, Tj, Ll, Ep, Sq				din cauza ploii, nu s-au fotografiat si cantarit animalele	ploua puternic pe timpul transectului	innorat	portiunea de transect intre sosea si capcana 1 este inundata
2016.02.28	21:00:00	23	m	6.34			poteca	1.2	a plouat noaptea si dimineata	5 Ll, 6 Tj, 2 Ep, 2 Tt, canta Cs, Tt, Tj, Ll, Ep, Sq				din cauza ploii, nu s-au fotografiat si cantarit animalele	ploua puternic pe timpul transectului	innorat	portiunea de transect intre sosea si capcana 1 este inundata
2016.02.28	21:00:00	24	m	53.5			poteca	1.2	a plouat noaptea si dimineata	5 Ll, 6 Tj, 2 Ep, 2 Tt, canta Cs, Tt, Tj, Ll, Ep, Sq				din cauza ploii, nu s-au fotografiat si cantarit animalele	ploua puternic pe timpul transectului	innorat	portiunea de transect intre sosea si capcana 1 este inundata
2016.02.28	21:00:00	25	m	59.2			poteca	1.2	a plouat noaptea si dimineata	5 Ll, 6 Tj, 2 Ep, 2 Tt, canta Cs, Tt, Tj, Ll, Ep, Sq				din cauza ploii, nu s-au fotografiat si cantarit animalele	ploua puternic pe timpul transectului	innorat	portiunea de transect intre sosea si capcana 1 este inundata
2016.02.28	21:00:00	26	f	65.6			poteca	1.2	a plouat noaptea si dimineata	5 Ll, 6 Tj, 2 Ep, 2 Tt, canta Cs, Tt, Tj, Ll, Ep, Sq				din cauza ploii, nu s-au fotografiat si cantarit animalele	ploua puternic pe timpul transectului	innorat	portiunea de transect intre sosea si capcana 1 este inundata
2016.02.28	21:00:00	27	m	58.4			poteca	1.2	a plouat noaptea si dimineata	5 Ll, 6 Tj, 2 Ep, 2 Tt, canta Cs, Tt, Tj, Ll, Ep, Sq				din cauza ploii, nu s-au fotografiat si cantarit animalele	ploua puternic pe timpul transectului	innorat	portiunea de transect intre sosea si capcana 1 este inundata
2016.02.28	21:00:00	28	m	58.4			poteca	1.2	a plouat noaptea si dimineata	5 Ll, 6 Tj, 2 Ep, 2 Tt, canta Cs, Tt, Tj, Ll, Ep, Sq				din cauza ploii, nu s-au fotografiat si cantarit animalele	ploua puternic pe timpul transectului	innorat	portiunea de transect intre sosea si capcana 1 este inundata
2016.02.28	21:00:00	29	m	53.9			poteca	1.2	a plouat noaptea si dimineata	5 Ll, 6 Tj, 2 Ep, 2 Tt, canta Cs, Tt, Tj, Ll, Ep, Sq				din cauza ploii, nu s-au fotografiat si cantarit animalele	ploua puternic pe timpul transectului	innorat	portiunea de transect intre sosea si capcana 1 este inundata
2016.02.28	21:00:00	30	f	61.7			poteca	1.2	a plouat noaptea si dimineata	5 Ll, 6 Tj, 2 Ep, 2 Tt, canta Cs, Tt, Tj, Ll, Ep, Sq				din cauza ploii, nu s-au fotografiat si cantarit animalele	ploua puternic pe timpul transectului	innorat	portiunea de transect intre sosea si capcana 1 este inundata
2016.02.28	21:00:00	31	m	61.7			poteca	1.2	a plouat noaptea si dimineata	5 Ll, 6 Tj, 2 Ep, 2 Tt, canta Cs, Tt, Tj, Ll, Ep, Sq				din cauza ploii, nu s-au fotografiat si cantarit animalele	ploua puternic pe timpul transectului	innorat	portiunea de transect intre sosea si capcana 1 este inundata
2016.02.28	21:00:00	32	f	59.6			poteca	1.2	a plouat noaptea si dimineata	5 Ll, 6 Tj, 2 Ep, 2 Tt, canta Cs, Tt, Tj, Ll, Ep, Sq				din cauza ploii, nu s-au fotografiat si cantarit animalele	ploua puternic pe timpul transectului	innorat	portiunea de transect intre sosea si capcana 1 este inundata
2016.02.28	21:00:00	33	f	65.1			poteca	1.2	a plouat noaptea si dimineata	5 Ll, 6 Tj, 2 Ep, 2 Tt, canta Cs, Tt, Tj, Ll, Ep, Sq				din cauza ploii, nu s-au fotografiat si cantarit animalele	ploua puternic pe timpul transectului	innorat	portiunea de transect intre sosea si capcana 1 este inundata
2016.02.28	21:00:00	34	f	62.4			poteca	1.2	a plouat noaptea si dimineata	5 Ll, 6 Tj, 2 Ep, 2 Tt, canta Cs, Tt, Tj, Ll, Ep, Sq				din cauza ploii, nu s-au fotografiat si cantarit animalele	ploua puternic pe timpul transectului	innorat	portiunea de transect intre sosea si capcana 1 este inundata
2016.02.28	21:00:00	35	f	72.6			poteca	1.2	a plouat noaptea si dimineata	5 Ll, 6 Tj, 2 Ep, 2 Tt, canta Cs, Tt, Tj, Ll, Ep, Sq				din cauza ploii, nu s-au fotografiat si cantarit animalele	ploua puternic pe timpul transectului	innorat	portiunea de transect intre sosea si capcana 1 este inundata
2016.02.28	21:00:00	36	f	58.4			poteca	1.2	a plouat noaptea si dimineata	5 Ll, 6 Tj, 2 Ep, 2 Tt, canta Cs, Tt, Tj, Ll, Ep, Sq				din cauza ploii, nu s-au fotografiat si cantarit animalele	ploua puternic pe timpul transectului	innorat	portiunea de transect intre sosea si capcana 1 este inundata
2016.02.28	21:00:00	37	f	61.8			poteca	1.2	a plouat noaptea si dimineata	5 Ll, 6 Tj, 2 Ep, 2 Tt, canta Cs, Tt, Tj, Ll, Ep, Sq				din cauza ploii, nu s-au fotografiat si cantarit animalele	ploua puternic pe timpul transectului	innorat	portiunea de transect intre sosea si capcana 1 este inundata
2016.02.28	21:00:00	38	m	61.4			poteca	1.2	a plouat noaptea si dimineata	5 Ll, 6 Tj, 2 Ep, 2 Tt, canta Cs, Tt, Tj, Ll, Ep, Sq				din cauza ploii, nu s-au fotografiat si cantarit animalele	ploua puternic pe timpul transectului	innorat	portiunea de transect intre sosea si capcana 1 este inundata
2016.02.28	21:00:00	39	f	68.7			poteca	1.2	a plouat noaptea si dimineata	5 Ll, 6 Tj, 2 Ep, 2 Tt, canta Cs, Tt, Tj, Ll, Ep, Sq				din cauza ploii, nu s-au fotografiat si cantarit animalele	ploua puternic pe timpul transectului	innorat	portiunea de transect intre sosea si capcana 1 este inundata
2016.02.28	21:00:00	40	m	66.1			poteca	1.2	a plouat noaptea si dimineata	5 Ll, 6 Tj, 2 Ep, 2 Tt, canta Cs, Tt, Tj, Ll, Ep, Sq				din cauza ploii, nu s-au fotografiat si cantarit animalele	ploua puternic pe timpul transectului	innorat	portiunea de transect intre sosea si capcana 1 este inundata
2016.02.28	21:00:00	41	f	66.2			poteca	1.2	a plouat noaptea si dimineata	5 Ll, 6 Tj, 2 Ep, 2 Tt, canta Cs, Tt, Tj, Ll, Ep, Sq				din cauza ploii, nu s-au fotografiat si cantarit animalele	ploua puternic pe timpul transectului	innorat	portiunea de transect intre sosea si capcana 1 este inundata
2016.02.28	21:00:00	42	m	61.7			ascuns in vegetatie	1.2	a plouat noaptea si dimineata	5 Ll, 6 Tj, 2 Ep, 2 Tt, canta Cs, Tt, Tj, Ll, Ep, Sq				din cauza ploii, nu s-au fotografiat si cantarit animalele	ploua puternic pe timpul transectului	innorat	portiunea de transect intre sosea si capcana 1 este inundata
2016.02.28	21:00:00	43	f	61.4			poteca	1.2	a plouat noaptea si dimineata	5 Ll, 6 Tj, 2 Ep, 2 Tt, canta Cs, Tt, Tj, Ll, Ep, Sq				din cauza ploii, nu s-au fotografiat si cantarit animalele	ploua puternic pe timpul transectului	innorat	portiunea de transect intre sosea si capcana 1 este inundata
2016.02.28	21:00:00	44	m	59.2			poteca	1.2	a plouat noaptea si dimineata	5 Ll, 6 Tj, 2 Ep, 2 Tt, canta Cs, Tt, Tj, Ll, Ep, Sq				din cauza ploii, nu s-au fotografiat si cantarit animalele	ploua puternic pe timpul transectului	innorat	portiunea de transect intre sosea si capcana 1 este inundata
2016.02.28	21:00:00	45	f	66.9			ascuns in vegetatie	1.2	a plouat noaptea si dimineata	5 Ll, 6 Tj, 2 Ep, 2 Tt, canta Cs, Tt, Tj, Ll, Ep, Sq				din cauza ploii, nu s-au fotografiat si cantarit animalele	ploua puternic pe timpul transectului	innorat	portiunea de transect intre sosea si capcana 1 este inundata
2016.02.28	21:00:00	46	f	63.8			poteca	1.2	a plouat noaptea si dimineata	5 Ll, 6 Tj, 2 Ep, 2 Tt, canta Cs, Tt, Tj, Ll, Ep, Sq				din cauza ploii, nu s-au fotografiat si cantarit animalele	ploua puternic pe timpul transectului	innorat	portiunea de transect intre sosea si capcana 1 este inundata
2016.02.28	21:00:00	47	m	65.6			ascuns in vegetatie	1.2	a plouat noaptea si dimineata	5 Ll, 6 Tj, 2 Ep, 2 Tt, canta Cs, Tt, Tj, Ll, Ep, Sq				din cauza ploii, nu s-au fotografiat si cantarit animalele	ploua puternic pe timpul transectului	innorat	portiunea de transect intre sosea si capcana 1 este inundata
2016.02.28	21:00:00	48	m	64.9			poteca	1.2	a plouat noaptea si dimineata	5 Ll, 6 Tj, 2 Ep, 2 Tt, canta Cs, Tt, Tj, Ll, Ep, Sq				din cauza ploii, nu s-au fotografiat si cantarit animalele	ploua puternic pe timpul transectului	innorat	portiunea de transect intre sosea si capcana 1 este inundata
2016.02.28	21:00:00	49	m	59.8			poteca	1.2	a plouat noaptea si dimineata	5 Ll, 6 Tj, 2 Ep, 2 Tt, canta Cs, Tt, Tj, Ll, Ep, Sq				din cauza ploii, nu s-au fotografiat si cantarit animalele	ploua puternic pe timpul transectului	innorat	portiunea de transect intre sosea si capcana 1 este inundata
2016.02.28	21:00:00	50	m	62.9			poteca	1.2	a plouat noaptea si dimineata	5 Ll, 6 Tj, 2 Ep, 2 Tt, canta Cs, Tt, Tj, Ll, Ep, Sq				din cauza ploii, nu s-au fotografiat si cantarit animalele	ploua puternic pe timpul transectului	innorat	portiunea de transect intre sosea si capcana 1 este inundata
2016.02.28	21:00:00	51	m	62.1			poteca	1.2	a plouat noaptea si dimineata	5 Ll, 6 Tj, 2 Ep, 2 Tt, canta Cs, Tt, Tj, Ll, Ep, Sq				din cauza ploii, nu s-au fotografiat si cantarit animalele	ploua puternic pe timpul transectului	innorat	portiunea de transect intre sosea si capcana 1 este inundata
2016.02.28	21:00:00	52	f	62.9			poteca	1.2	a plouat noaptea si dimineata	5 Ll, 6 Tj, 2 Ep, 2 Tt, canta Cs, Tt, Tj, Ll, Ep, Sq				din cauza ploii, nu s-au fotografiat si cantarit animalele	ploua puternic pe timpul transectului	innorat	portiunea de transect intre sosea si capcana 1 este inundata
2016.02.28	21:00:00	53	f	58.9			poteca	1.2	a plouat noaptea si dimineata	5 Ll, 6 Tj, 2 Ep, 2 Tt, canta Cs, Tt, Tj, Ll, Ep, Sq				din cauza ploii, nu s-au fotografiat si cantarit animalele	ploua puternic pe timpul transectului	innorat	portiunea de transect intre sosea si capcana 1 este inundata
2016.02.28	21:00:00	54	m	60.1			poteca	1.2	a plouat noaptea si dimineata	5 Ll, 6 Tj, 2 Ep, 2 Tt, canta Cs, Tt, Tj, Ll, Ep, Sq				din cauza ploii, nu s-au fotografiat si cantarit animalele	ploua puternic pe timpul transectului	innorat	portiunea de transect intre sosea si capcana 1 este inundata
2016.02.28	21:00:00	55	f	62.8			poteca	1.2	a plouat noaptea si dimineata	5 Ll, 6 Tj, 2 Ep, 2 Tt, canta Cs, Tt, Tj, Ll, Ep, Sq				din cauza ploii, nu s-au fotografiat si cantarit animalele	ploua puternic pe timpul transectului	innorat	portiunea de transect intre sosea si capcana 1 este inundata
2016.02.28	21:00:00	56	f	68.4			poteca	1.2	a plouat noaptea si dimineata	5 Ll, 6 Tj, 2 Ep, 2 Tt, canta Cs, Tt, Tj, Ll, Ep, Sq				din cauza ploii, nu s-au fotografiat si cantarit animalele	ploua puternic pe timpul transectului	innorat	portiunea de transect intre sosea si capcana 1 este inundata
2016.02.28	21:00:00	57	m	65.1			poteca	1.2	a plouat noaptea si dimineata	5 Ll, 6 Tj, 2 Ep, 2 Tt, canta Cs, Tt, Tj, Ll, Ep, Sq				din cauza ploii, nu s-au fotografiat si cantarit animalele	ploua puternic pe timpul transectului	innorat	portiunea de transect intre sosea si capcana 1 este inundata
2016.02.28	21:00:00	58	m	62.7			poteca	1.2	a plouat noaptea si dimineata	5 Ll, 6 Tj, 2 Ep, 2 Tt, canta Cs, Tt, Tj, Ll, Ep, Sq				din cauza ploii, nu s-au fotografiat si cantarit animalele	ploua puternic pe timpul transectului	innorat	portiunea de transect intre sosea si capcana 1 este inundata
2016.02.28	21:00:00	59	f	62.1			poteca	1.2	a plouat noaptea si dimineata	5 Ll, 6 Tj, 2 Ep, 2 Tt, canta Cs, Tt, Tj, Ll, Ep, Sq				din cauza ploii, nu s-au fotografiat si cantarit animalele	ploua puternic pe timpul transectului	innorat	portiunea de transect intre sosea si capcana 1 este inundata
2016.02.28	21:00:00	60	m	63.6			poteca	1.2	a plouat noaptea si dimineata	5 Ll, 6 Tj, 2 Ep, 2 Tt, canta Cs, Tt, Tj, Ll, Ep, Sq				din cauza ploii, nu s-au fotografiat si cantarit animalele	ploua puternic pe timpul transectului	innorat	portiunea de transect intre sosea si capcana 1 este inundata
2016.02.28	21:00:00	61	f	62.1			poteca	1.2	a plouat noaptea si dimineata	5 Ll, 6 Tj, 2 Ep, 2 Tt, canta Cs, Tt, Tj, Ll, Ep, Sq				din cauza ploii, nu s-au fotografiat si cantarit animalele	ploua puternic pe timpul transectului	innorat	portiunea de transect intre sosea si capcana 1 este inundata
2016.02.28	21:00:00	62	m	67			poteca	1.2	a plouat noaptea si dimineata	5 Ll, 6 Tj, 2 Ep, 2 Tt, canta Cs, Tt, Tj, Ll, Ep, Sq				din cauza ploii, nu s-au fotografiat si cantarit animalele	ploua puternic pe timpul transectului	innorat	portiunea de transect intre sosea si capcana 1 este inundata
2016.02.28	21:00:00	63	m	66.4			poteca	1.2	a plouat noaptea si dimineata	5 Ll, 6 Tj, 2 Ep, 2 Tt, canta Cs, Tt, Tj, Ll, Ep, Sq				din cauza ploii, nu s-au fotografiat si cantarit animalele	ploua puternic pe timpul transectului	innorat	portiunea de transect intre sosea si capcana 1 este inundata
2016.02.28	21:00:00	64	m	64.8			poteca	1.2	a plouat noaptea si dimineata	5 Ll, 6 Tj, 2 Ep, 2 Tt, canta Cs, Tt, Tj, Ll, Ep, Sq			marcat	din cauza ploii, nu s-au fotografiat si cantarit animalele	ploua puternic pe timpul transectului	innorat	portiunea de transect intre sosea si capcana 1 este inundata
2016.02.28	21:00:00	65	f	65.8			poteca	1.2	a plouat noaptea si dimineata	5 Ll, 6 Tj, 2 Ep, 2 Tt, canta Cs, Tt, Tj, Ll, Ep, Sq				din cauza ploii, nu s-au fotografiat si cantarit animalele	ploua puternic pe timpul transectului	innorat	portiunea de transect intre sosea si capcana 1 este inundata
2016.02.28	21:00:00	66	m	64.4			poteca	1.2	a plouat noaptea si dimineata	5 Ll, 6 Tj, 2 Ep, 2 Tt, canta Cs, Tt, Tj, Ll, Ep, Sq				din cauza ploii, nu s-au fotografiat si cantarit animalele	ploua puternic pe timpul transectului	innorat	portiunea de transect intre sosea si capcana 1 este inundata
2016.02.28	21:00:00	67	m	61.8			poteca	1.2	a plouat noaptea si dimineata	5 Ll, 6 Tj, 2 Ep, 2 Tt, canta Cs, Tt, Tj, Ll, Ep, Sq				din cauza ploii, nu s-au fotografiat si cantarit animalele	ploua puternic pe timpul transectului	innorat	portiunea de transect intre sosea si capcana 1 este inundata
2016.02.28	21:00:00	68	m	62.8			poteca	1.2	a plouat noaptea si dimineata	5 Ll, 6 Tj, 2 Ep, 2 Tt, canta Cs, Tt, Tj, Ll, Ep, Sq				din cauza ploii, nu s-au fotografiat si cantarit animalele	ploua puternic pe timpul transectului	innorat	portiunea de transect intre sosea si capcana 1 este inundata
2016.02.28	21:00:00	69	m	62.7			poteca	1.2	a plouat noaptea si dimineata	5 Ll, 6 Tj, 2 Ep, 2 Tt, canta Cs, Tt, Tj, Ll, Ep, Sq				din cauza ploii, nu s-au fotografiat si cantarit animalele	ploua puternic pe timpul transectului	innorat	portiunea de transect intre sosea si capcana 1 este inundata
2016.02.28	21:00:00	70	m	63.1			poteca	1.2	a plouat noaptea si dimineata	5 Ll, 6 Tj, 2 Ep, 2 Tt, canta Cs, Tt, Tj, Ll, Ep, Sq				din cauza ploii, nu s-au fotografiat si cantarit animalele	ploua puternic pe timpul transectului	innorat	portiunea de transect intre sosea si capcana 1 este inundata
2016.02.28	21:00:00	71					ascuns in vegetatie	1.2	a plouat noaptea si dimineata	5 Ll, 6 Tj, 2 Ep, 2 Tt, canta Cs, Tt, Tj, Ll, Ep, Sq			pierdut	din cauza ploii, nu s-au fotografiat si cantarit animalele	ploua puternic pe timpul transectului	innorat	portiunea de transect intre sosea si capcana 1 este inundata
2016.02.28	21:00:00	72	f	73.5			poteca	1.2	a plouat noaptea si dimineata	5 Ll, 6 Tj, 2 Ep, 2 Tt, canta Cs, Tt, Tj, Ll, Ep, Sq				din cauza ploii, nu s-au fotografiat si cantarit animalele	ploua puternic pe timpul transectului	innorat	portiunea de transect intre sosea si capcana 1 este inundata
2016.02.28	21:00:00	73	m	62.9			poteca	1.2	a plouat noaptea si dimineata	5 Ll, 6 Tj, 2 Ep, 2 Tt, canta Cs, Tt, Tj, Ll, Ep, Sq			marcat	din cauza ploii, nu s-au fotografiat si cantarit animalele	ploua puternic pe timpul transectului	innorat	portiunea de transect intre sosea si capcana 1 este inundata
2016.02.28	21:00:00	74	m	62.1			poteca	1.2	a plouat noaptea si dimineata	5 Ll, 6 Tj, 2 Ep, 2 Tt, canta Cs, Tt, Tj, Ll, Ep, Sq				din cauza ploii, nu s-au fotografiat si cantarit animalele	ploua puternic pe timpul transectului	innorat	portiunea de transect intre sosea si capcana 1 este inundata
2016.02.28	21:00:00	75	f	64.9			poteca	1.2	a plouat noaptea si dimineata	5 Ll, 6 Tj, 2 Ep, 2 Tt, canta Cs, Tt, Tj, Ll, Ep, Sq				din cauza ploii, nu s-au fotografiat si cantarit animalele	ploua puternic pe timpul transectului	innorat	portiunea de transect intre sosea si capcana 1 este inundata
2016.02.28	21:00:00	76	m	56.3			poteca	1.2	a plouat noaptea si dimineata	5 Ll, 6 Tj, 2 Ep, 2 Tt, canta Cs, Tt, Tj, Ll, Ep, Sq				din cauza ploii, nu s-au fotografiat si cantarit animalele	ploua puternic pe timpul transectului	innorat	portiunea de transect intre sosea si capcana 1 este inundata
2016.02.28	21:00:00	77	m	61.6			poteca	1.2	a plouat noaptea si dimineata	5 Ll, 6 Tj, 2 Ep, 2 Tt, canta Cs, Tt, Tj, Ll, Ep, Sq				din cauza ploii, nu s-au fotografiat si cantarit animalele	ploua puternic pe timpul transectului	innorat	portiunea de transect intre sosea si capcana 1 este inundata
2016.02.28	21:00:00	78	m	66.1			poteca	1.2	a plouat noaptea si dimineata	5 Ll, 6 Tj, 2 Ep, 2 Tt, canta Cs, Tt, Tj, Ll, Ep, Sq				din cauza ploii, nu s-au fotografiat si cantarit animalele	ploua puternic pe timpul transectului	innorat	portiunea de transect intre sosea si capcana 1 este inundata
2016.02.28	21:00:00	79	f	70			poteca	1.2	a plouat noaptea si dimineata	5 Ll, 6 Tj, 2 Ep, 2 Tt, canta Cs, Tt, Tj, Ll, Ep, Sq				din cauza ploii, nu s-au fotografiat si cantarit animalele	ploua puternic pe timpul transectului	innorat	portiunea de transect intre sosea si capcana 1 este inundata
2016.02.28	21:00:00	80	m	58.2			poteca	1.2	a plouat noaptea si dimineata	5 Ll, 6 Tj, 2 Ep, 2 Tt, canta Cs, Tt, Tj, Ll, Ep, Sq				din cauza ploii, nu s-au fotografiat si cantarit animalele	ploua puternic pe timpul transectului	innorat	portiunea de transect intre sosea si capcana 1 este inundata
2016.02.28	21:00:00	81	f	61.8			poteca	1.2	a plouat noaptea si dimineata	5 Ll, 6 Tj, 2 Ep, 2 Tt, canta Cs, Tt, Tj, Ll, Ep, Sq				din cauza ploii, nu s-au fotografiat si cantarit animalele	ploua puternic pe timpul transectului	innorat	portiunea de transect intre sosea si capcana 1 este inundata
2016.02.28	21:00:00	82	f	71.7			poteca	1.2	a plouat noaptea si dimineata	5 Ll, 6 Tj, 2 Ep, 2 Tt, canta Cs, Tt, Tj, Ll, Ep, Sq				din cauza ploii, nu s-au fotografiat si cantarit animalele	ploua puternic pe timpul transectului	innorat	portiunea de transect intre sosea si capcana 1 este inundata
2016.02.28	21:00:00	83	m	67.3			poteca	1.2	a plouat noaptea si dimineata	5 Ll, 6 Tj, 2 Ep, 2 Tt, canta Cs, Tt, Tj, Ll, Ep, Sq				din cauza ploii, nu s-au fotografiat si cantarit animalele	ploua puternic pe timpul transectului	innorat	portiunea de transect intre sosea si capcana 1 este inundata
2016.02.28	21:00:00	84	f	71.6			poteca	1.2	a plouat noaptea si dimineata	5 Ll, 6 Tj, 2 Ep, 2 Tt, canta Cs, Tt, Tj, Ll, Ep, Sq				din cauza ploii, nu s-au fotografiat si cantarit animalele	ploua puternic pe timpul transectului	innorat	portiunea de transect intre sosea si capcana 1 este inundata
2016.02.28	21:00:00	85	f	72.4			poteca	1.2	a plouat noaptea si dimineata	5 Ll, 6 Tj, 2 Ep, 2 Tt, canta Cs, Tt, Tj, Ll, Ep, Sq				din cauza ploii, nu s-au fotografiat si cantarit animalele	ploua puternic pe timpul transectului	innorat	portiunea de transect intre sosea si capcana 1 este inundata
2016.02.28	21:00:00	86	m	61.8			poteca	1.2	a plouat noaptea si dimineata	5 Ll, 6 Tj, 2 Ep, 2 Tt, canta Cs, Tt, Tj, Ll, Ep, Sq				din cauza ploii, nu s-au fotografiat si cantarit animalele	ploua puternic pe timpul transectului	innorat	portiunea de transect intre sosea si capcana 1 este inundata
2016.02.28	21:00:00	87	m	61.7			poteca	1.2	a plouat noaptea si dimineata	5 Ll, 6 Tj, 2 Ep, 2 Tt, canta Cs, Tt, Tj, Ll, Ep, Sq				din cauza ploii, nu s-au fotografiat si cantarit animalele	ploua puternic pe timpul transectului	innorat	portiunea de transect intre sosea si capcana 1 este inundata
2016.02.28	21:00:00	88	m	58.3			poteca	1.2	a plouat noaptea si dimineata	5 Ll, 6 Tj, 2 Ep, 2 Tt, canta Cs, Tt, Tj, Ll, Ep, Sq				din cauza ploii, nu s-au fotografiat si cantarit animalele	ploua puternic pe timpul transectului	innorat	portiunea de transect intre sosea si capcana 1 este inundata
2016.02.29	23:00:00	1	f	59.1	26.7	26.6	poteca	3	a plouat noaptea	10 Ll, 6 Tj, 1 Ep					ploua incepand cu 21:00 si la inceputul transectului	inorat, dar se vede luna spre sfarsitul transectului	portiunea de transect intre sosea si capcana 1 este inundata
2016.02.29	23:00:00	2	f	59.8	28	24.5	ascuns in vegetatie	3	a plouat noaptea	10 Ll, 6 Tj, 1 Ep					ploua incepand cu 21:00 si la inceputul transectului	inorat, dar se vede luna spre sfarsitul transectului	portiunea de transect intre sosea si capcana 1 este inundata
2016.02.29	23:00:00	3	f	59.6	30.7	28.2	ascuns in vegetatie	3	a plouat noaptea	10 Ll, 6 Tj, 1 Ep					ploua incepand cu 21:00 si la inceputul transectului	inorat, dar se vede luna spre sfarsitul transectului	portiunea de transect intre sosea si capcana 1 este inundata
2016.02.29	23:00:00	4	f	61.6	30.8	28.2	ascuns in vegetatie	3	a plouat noaptea	10 Ll, 6 Tj, 1 Ep					ploua incepand cu 21:00 si la inceputul transectului	inorat, dar se vede luna spre sfarsitul transectului	portiunea de transect intre sosea si capcana 1 este inundata
2016.02.29	23:00:00	5	f	71.6	32.2	47.1	apa	3	a plouat noaptea	10 Ll, 6 Tj, 1 Ep					ploua incepand cu 21:00 si la inceputul transectului	inorat, dar se vede luna spre sfarsitul transectului	portiunea de transect intre sosea si capcana 1 este inundata
2016.02.29	23:00:00	6	f	59.4	27.9	21.3	ascuns in vegetatie	3	a plouat noaptea	10 Ll, 6 Tj, 1 Ep					ploua incepand cu 21:00 si la inceputul transectului	inorat, dar se vede luna spre sfarsitul transectului	portiunea de transect intre sosea si capcana 1 este inundata
2016.02.29	23:00:00	7					ascuns in vegetatie	3	a plouat noaptea	10 Ll, 6 Tj, 1 Ep			pierdut		ploua incepand cu 21:00 si la inceputul transectului	inorat, dar se vede luna spre sfarsitul transectului	portiunea de transect intre sosea si capcana 1 este inundata
2016.02.29	23:00:00	9	f	61.5	31.3	20.7	ascuns in vegetatie	3	a plouat noaptea	10 Ll, 6 Tj, 1 Ep					ploua incepand cu 21:00 si la inceputul transectului	inorat, dar se vede luna spre sfarsitul transectului	portiunea de transect intre sosea si capcana 1 este inundata
2016.02.29	23:00:00	10	f	58.6	30.5	21.9	ascuns in vegetatie	3	a plouat noaptea	10 Ll, 6 Tj, 1 Ep					ploua incepand cu 21:00 si la inceputul transectului	inorat, dar se vede luna spre sfarsitul transectului	portiunea de transect intre sosea si capcana 1 este inundata
2016.02.29	23:00:00	11	m	58.7	28.5	22.7	poteca	3	a plouat noaptea	10 Ll, 6 Tj, 1 Ep					ploua incepand cu 21:00 si la inceputul transectului	inorat, dar se vede luna spre sfarsitul transectului	portiunea de transect intre sosea si capcana 1 este inundata
2016.02.29	23:00:00	12	m	61.7	27.4	24.8	ascuns in vegetatie	3	a plouat noaptea	10 Ll, 6 Tj, 1 Ep					ploua incepand cu 21:00 si la inceputul transectului	inorat, dar se vede luna spre sfarsitul transectului	portiunea de transect intre sosea si capcana 1 este inundata
2016.02.29	23:00:00	13	m	59.7	28.4	24.7	ascuns in vegetatie	3	a plouat noaptea	10 Ll, 6 Tj, 1 Ep					ploua incepand cu 21:00 si la inceputul transectului	inorat, dar se vede luna spre sfarsitul transectului	portiunea de transect intre sosea si capcana 1 este inundata
2016.02.29	23:00:00	14	f	61.7	32.2	24.2	ascuns in vegetatie	3	a plouat noaptea	10 Ll, 6 Tj, 1 Ep					ploua incepand cu 21:00 si la inceputul transectului	inorat, dar se vede luna spre sfarsitul transectului	portiunea de transect intre sosea si capcana 1 este inundata
2016.02.29	23:00:00	15	m	58.6	29	18.4	poteca	3	a plouat noaptea	10 Ll, 6 Tj, 1 Ep					ploua incepand cu 21:00 si la inceputul transectului	inorat, dar se vede luna spre sfarsitul transectului	portiunea de transect intre sosea si capcana 1 este inundata
2016.02.29	23:00:00	16					apa	3	a plouat noaptea	10 Ll, 6 Tj, 1 Ep			pierdut		ploua incepand cu 21:00 si la inceputul transectului	inorat, dar se vede luna spre sfarsitul transectului	portiunea de transect intre sosea si capcana 1 este inundata
2016.02.29	23:00:00	17	m	58.5	28.1	23	ascuns in vegetatie	3	a plouat noaptea	10 Ll, 6 Tj, 1 Ep					ploua incepand cu 21:00 si la inceputul transectului	inorat, dar se vede luna spre sfarsitul transectului	portiunea de transect intre sosea si capcana 1 este inundata
2016.02.29	23:00:00	18	m	63.7	31.5	30.6	poteca	3	a plouat noaptea	10 Ll, 6 Tj, 1 Ep			marcat		ploua incepand cu 21:00 si la inceputul transectului	inorat, dar se vede luna spre sfarsitul transectului	portiunea de transect intre sosea si capcana 1 este inundata
2016.02.29	23:00:00	19	m	61.4	29.8	27	poteca	3	a plouat noaptea	10 Ll, 6 Tj, 1 Ep					ploua incepand cu 21:00 si la inceputul transectului	inorat, dar se vede luna spre sfarsitul transectului	portiunea de transect intre sosea si capcana 1 este inundata
2016.02.29	23:00:00	20	f	62.4	30.5	29.7	poteca	3	a plouat noaptea	10 Ll, 6 Tj, 1 Ep					ploua incepand cu 21:00 si la inceputul transectului	inorat, dar se vede luna spre sfarsitul transectului	portiunea de transect intre sosea si capcana 1 este inundata
2016.02.29	23:00:00	21	f	60.2	28.6	25.8	poteca	3	a plouat noaptea	10 Ll, 6 Tj, 1 Ep					ploua incepand cu 21:00 si la inceputul transectului	inorat, dar se vede luna spre sfarsitul transectului	portiunea de transect intre sosea si capcana 1 este inundata
2016.02.29	23:00:00	22	m	61.7	29.9	30.2	poteca	3	a plouat noaptea	10 Ll, 6 Tj, 1 Ep					ploua incepand cu 21:00 si la inceputul transectului	inorat, dar se vede luna spre sfarsitul transectului	portiunea de transect intre sosea si capcana 1 este inundata
2016.02.29	23:00:00	23	m	64.2	31.3	27.43	ascuns in vegetatie	3	a plouat noaptea	10 Ll, 6 Tj, 1 Ep					ploua incepand cu 21:00 si la inceputul transectului	inorat, dar se vede luna spre sfarsitul transectului	portiunea de transect intre sosea si capcana 1 este inundata
2016.02.29	23:00:00	24	f	59.6	27	25.7	poteca	3	a plouat noaptea	10 Ll, 6 Tj, 1 Ep					ploua incepand cu 21:00 si la inceputul transectului	inorat, dar se vede luna spre sfarsitul transectului	portiunea de transect intre sosea si capcana 1 este inundata
2016.02.29	23:00:00	25	f	55.2	25.5	16.57	poteca	3	a plouat noaptea	10 Ll, 6 Tj, 1 Ep					ploua incepand cu 21:00 si la inceputul transectului	inorat, dar se vede luna spre sfarsitul transectului	portiunea de transect intre sosea si capcana 1 este inundata
2016.02.29	23:00:00	26	m	64.3	30	34.35	poteca	3	a plouat noaptea	10 Ll, 6 Tj, 1 Ep			marcat		ploua incepand cu 21:00 si la inceputul transectului	inorat, dar se vede luna spre sfarsitul transectului	portiunea de transect intre sosea si capcana 1 este inundata
2016.02.29	23:00:00	27	f	62.9	29.8	29.03	poteca	3	a plouat noaptea	10 Ll, 6 Tj, 1 Ep					ploua incepand cu 21:00 si la inceputul transectului	inorat, dar se vede luna spre sfarsitul transectului	portiunea de transect intre sosea si capcana 1 este inundata
2016.02.29	23:00:00	28	f	58.1	27.9	24.26	poteca	3	a plouat noaptea	10 Ll, 6 Tj, 1 Ep					ploua incepand cu 21:00 si la inceputul transectului	inorat, dar se vede luna spre sfarsitul transectului	portiunea de transect intre sosea si capcana 1 este inundata
2016.02.29	23:00:00	29	f	65.3	30.9	30.35	poteca	3	a plouat noaptea	10 Ll, 6 Tj, 1 Ep					ploua incepand cu 21:00 si la inceputul transectului	inorat, dar se vede luna spre sfarsitul transectului	portiunea de transect intre sosea si capcana 1 este inundata
2016.02.29	23:00:00	30	f	60.1	27.7	25.42	poteca	3	a plouat noaptea	10 Ll, 6 Tj, 1 Ep					ploua incepand cu 21:00 si la inceputul transectului	inorat, dar se vede luna spre sfarsitul transectului	portiunea de transect intre sosea si capcana 1 este inundata
2016.02.29	23:00:00	31	f	60	29.2	24.42	poteca	3	a plouat noaptea	10 Ll, 6 Tj, 1 Ep					ploua incepand cu 21:00 si la inceputul transectului	inorat, dar se vede luna spre sfarsitul transectului	portiunea de transect intre sosea si capcana 1 este inundata
2016.02.29	23:00:00	32	m	57.3	28.9	22.94	poteca	3	a plouat noaptea	10 Ll, 6 Tj, 1 Ep					ploua incepand cu 21:00 si la inceputul transectului	inorat, dar se vede luna spre sfarsitul transectului	portiunea de transect intre sosea si capcana 1 este inundata
2016.02.29	23:00:00	33	f	64.7	30.7	29.04	ascuns in vegetatie	3	a plouat noaptea	10 Ll, 6 Tj, 1 Ep					ploua incepand cu 21:00 si la inceputul transectului	inorat, dar se vede luna spre sfarsitul transectului	portiunea de transect intre sosea si capcana 1 este inundata
2016.02.29	23:00:00	34	m	63.9	32.2	30.27	poteca	3	a plouat noaptea	10 Ll, 6 Tj, 1 Ep					ploua incepand cu 21:00 si la inceputul transectului	inorat, dar se vede luna spre sfarsitul transectului	portiunea de transect intre sosea si capcana 1 este inundata
2016.02.29	23:00:00	35	m	65.8	30.3	33.97	poteca	3	a plouat noaptea	10 Ll, 6 Tj, 1 Ep					ploua incepand cu 21:00 si la inceputul transectului	inorat, dar se vede luna spre sfarsitul transectului	portiunea de transect intre sosea si capcana 1 este inundata
2016.02.29	23:00:00	36	f	62.6	31.9	28.77	poteca	3	a plouat noaptea	10 Ll, 6 Tj, 1 Ep					ploua incepand cu 21:00 si la inceputul transectului	inorat, dar se vede luna spre sfarsitul transectului	portiunea de transect intre sosea si capcana 1 este inundata
2016.02.29	23:00:00	37	m	61.6	30.1	25.21	poteca	3	a plouat noaptea	10 Ll, 6 Tj, 1 Ep					ploua incepand cu 21:00 si la inceputul transectului	inorat, dar se vede luna spre sfarsitul transectului	portiunea de transect intre sosea si capcana 1 este inundata
2016.02.29	23:00:00	38	m	63.1	31.4	28.35	poteca	3	a plouat noaptea	10 Ll, 6 Tj, 1 Ep					ploua incepand cu 21:00 si la inceputul transectului	inorat, dar se vede luna spre sfarsitul transectului	portiunea de transect intre sosea si capcana 1 este inundata
2016.02.29	23:00:00	39					ascuns in vegetatie	3	a plouat noaptea	10 Ll, 6 Tj, 1 Ep			pierdut		ploua incepand cu 21:00 si la inceputul transectului	inorat, dar se vede luna spre sfarsitul transectului	portiunea de transect intre sosea si capcana 1 este inundata
2016.02.29	23:00:00	40	m	61.4	30.5	23.61	poteca	3	a plouat noaptea	10 Ll, 6 Tj, 1 Ep					ploua incepand cu 21:00 si la inceputul transectului	inorat, dar se vede luna spre sfarsitul transectului	portiunea de transect intre sosea si capcana 1 este inundata
2016.02.29	23:00:00	41					ascuns in vegetatie	3	a plouat noaptea	10 Ll, 6 Tj, 1 Ep			pierdut		ploua incepand cu 21:00 si la inceputul transectului	inorat, dar se vede luna spre sfarsitul transectului	portiunea de transect intre sosea si capcana 1 este inundata
2016.02.29	23:00:00	42	m	65.1	29.7	29.71	poteca	3	a plouat noaptea	10 Ll, 6 Tj, 1 Ep					ploua incepand cu 21:00 si la inceputul transectului	inorat, dar se vede luna spre sfarsitul transectului	portiunea de transect intre sosea si capcana 1 este inundata
2016.02.29	23:00:00	43	m	59.3	27.2	20.66	poteca	3	a plouat noaptea	10 Ll, 6 Tj, 1 Ep					ploua incepand cu 21:00 si la inceputul transectului	inorat, dar se vede luna spre sfarsitul transectului	portiunea de transect intre sosea si capcana 1 este inundata
2016.02.29	23:00:00	44	f	62.5	29.3	23.84	poteca	3	a plouat noaptea	10 Ll, 6 Tj, 1 Ep					ploua incepand cu 21:00 si la inceputul transectului	inorat, dar se vede luna spre sfarsitul transectului	portiunea de transect intre sosea si capcana 1 este inundata
2016.02.29	23:00:00	45	f	66	32	35.15	poteca	3	a plouat noaptea	10 Ll, 6 Tj, 1 Ep					ploua incepand cu 21:00 si la inceputul transectului	inorat, dar se vede luna spre sfarsitul transectului	portiunea de transect intre sosea si capcana 1 este inundata
2016.02.29	23:00:00	46	m	62.6	31.4	27.41	poteca	3	a plouat noaptea	10 Ll, 6 Tj, 1 Ep					ploua incepand cu 21:00 si la inceputul transectului	inorat, dar se vede luna spre sfarsitul transectului	portiunea de transect intre sosea si capcana 1 este inundata
2016.03.01	01:00:00	1	f	65.2	30.4	29	poteca	0.8	a plouat cu intreruperi toata noaptea si ziua	2 Ll, 2 Tj, canta Ll, Ep, Tj, Rm					incepe sa ploua la mijlocul transectului	innorat	portiunea de transect intre sosea si capcana 1 este inundata
2016.03.01	01:00:00	2	m	61.5	29.6	30.2	poteca	0.8	a plouat cu intreruperi toata noaptea si ziua	2 Ll, 2 Tj, canta Ll, Ep, Tj, Rm					incepe sa ploua la mijlocul transectului	innorat	portiunea de transect intre sosea si capcana 1 este inundata
2016.03.01	01:00:00	3	f	61.6	26.9	24.3	ascuns in vegetatie	0.8	a plouat cu intreruperi toata noaptea si ziua	2 Ll, 2 Tj, canta Ll, Ep, Tj, Rm					incepe sa ploua la mijlocul transectului	innorat	portiunea de transect intre sosea si capcana 1 este inundata
2016.03.01	01:00:00	4	f	63.6	30	26.9	apa	0.8	a plouat cu intreruperi toata noaptea si ziua	2 Ll, 2 Tj, canta Ll, Ep, Tj, Rm					incepe sa ploua la mijlocul transectului	innorat	portiunea de transect intre sosea si capcana 1 este inundata
2016.03.01	01:00:00	5	m	61.5	29.2	28.1	apa	0.8	a plouat cu intreruperi toata noaptea si ziua	2 Ll, 2 Tj, canta Ll, Ep, Tj, Rm					incepe sa ploua la mijlocul transectului	innorat	portiunea de transect intre sosea si capcana 1 este inundata
2016.03.01	01:00:00	6	m	59.8	29.3	27.2	apa	0.8	a plouat cu intreruperi toata noaptea si ziua	2 Ll, 2 Tj, canta Ll, Ep, Tj, Rm					incepe sa ploua la mijlocul transectului	innorat	portiunea de transect intre sosea si capcana 1 este inundata
2016.03.01	01:00:00	7	f	58.7	28.3	22.8	apa	0.8	a plouat cu intreruperi toata noaptea si ziua	2 Ll, 2 Tj, canta Ll, Ep, Tj, Rm					incepe sa ploua la mijlocul transectului	innorat	portiunea de transect intre sosea si capcana 1 este inundata
2016.03.01	01:00:00	8	f	61.8	30.4	26	apa	0.8	a plouat cu intreruperi toata noaptea si ziua	2 Ll, 2 Tj, canta Ll, Ep, Tj, Rm					incepe sa ploua la mijlocul transectului	innorat	portiunea de transect intre sosea si capcana 1 este inundata
2016.03.01	01:00:00	9					ascuns in vegetatie	0.8	a plouat cu intreruperi toata noaptea si ziua	2 Ll, 2 Tj, canta Ll, Ep, Tj, Rm			pierdut, foto		incepe sa ploua la mijlocul transectului	innorat	portiunea de transect intre sosea si capcana 1 este inundata
2016.03.01	01:00:00	10	m	63.5	31.6	31.8	poteca	0.8	a plouat cu intreruperi toata noaptea si ziua	2 Ll, 2 Tj, canta Ll, Ep, Tj, Rm					incepe sa ploua la mijlocul transectului	innorat	portiunea de transect intre sosea si capcana 1 este inundata
2016.03.01	01:00:00	11	f	60.2	29.4	23.2	poteca	0.8	a plouat cu intreruperi toata noaptea si ziua	2 Ll, 2 Tj, canta Ll, Ep, Tj, Rm					incepe sa ploua la mijlocul transectului	innorat	portiunea de transect intre sosea si capcana 1 este inundata
2016.03.01	01:00:00	12	m	62.2	28.5	26.7	ascuns in vegetatie	0.8	a plouat cu intreruperi toata noaptea si ziua	2 Ll, 2 Tj, canta Ll, Ep, Tj, Rm					incepe sa ploua la mijlocul transectului	innorat	portiunea de transect intre sosea si capcana 1 este inundata
2016.03.01	01:00:00	13	m	62.1	32	26.7	apa	0.8	a plouat cu intreruperi toata noaptea si ziua	2 Ll, 2 Tj, canta Ll, Ep, Tj, Rm			marcat		incepe sa ploua la mijlocul transectului	innorat	portiunea de transect intre sosea si capcana 1 este inundata
2016.03.01	01:00:00	14	f	65.1	31.9	28.2	poteca	0.8	a plouat cu intreruperi toata noaptea si ziua	2 Ll, 2 Tj, canta Ll, Ep, Tj, Rm					incepe sa ploua la mijlocul transectului	innorat	portiunea de transect intre sosea si capcana 1 este inundata
2016.03.01	01:00:00	15	f	68.2	31.8	31.9	poteca	0.8	a plouat cu intreruperi toata noaptea si ziua	2 Ll, 2 Tj, canta Ll, Ep, Tj, Rm					incepe sa ploua la mijlocul transectului	innorat	portiunea de transect intre sosea si capcana 1 este inundata
2016.03.01	01:00:00	16	m	61.7	28.7	30.7	poteca	0.8	a plouat cu intreruperi toata noaptea si ziua	2 Ll, 2 Tj, canta Ll, Ep, Tj, Rm			marcat		incepe sa ploua la mijlocul transectului	innorat	portiunea de transect intre sosea si capcana 1 este inundata
2016.03.01	01:00:00	17					ascuns in vegetatie	0.8	a plouat cu intreruperi toata noaptea si ziua	2 Ll, 2 Tj, canta Ll, Ep, Tj, Rm			pierdut		incepe sa ploua la mijlocul transectului	innorat	portiunea de transect intre sosea si capcana 1 este inundata
2016.03.01	01:00:00	18	m	61.3	31	26.9	poteca	0.8	a plouat cu intreruperi toata noaptea si ziua	2 Ll, 2 Tj, canta Ll, Ep, Tj, Rm					incepe sa ploua la mijlocul transectului	innorat	portiunea de transect intre sosea si capcana 1 este inundata
2016.03.01	01:00:00	19	m	65.1	31.4	30.8	poteca	0.8	a plouat cu intreruperi toata noaptea si ziua	2 Ll, 2 Tj, canta Ll, Ep, Tj, Rm					incepe sa ploua la mijlocul transectului	innorat	portiunea de transect intre sosea si capcana 1 este inundata
2016.03.01	01:00:00	20	f	63	31.5	23.8	poteca	0.8	a plouat cu intreruperi toata noaptea si ziua	2 Ll, 2 Tj, canta Ll, Ep, Tj, Rm					incepe sa ploua la mijlocul transectului	innorat	portiunea de transect intre sosea si capcana 1 este inundata
2016.03.01	01:00:00	21	f	58.3	29.3	23.1	poteca	0.8	a plouat cu intreruperi toata noaptea si ziua	2 Ll, 2 Tj, canta Ll, Ep, Tj, Rm					incepe sa ploua la mijlocul transectului	innorat	portiunea de transect intre sosea si capcana 1 este inundata
2016.03.01	01:00:00	22	m	66.4	30.8	34.7	poteca	0.8	a plouat cu intreruperi toata noaptea si ziua	2 Ll, 2 Tj, canta Ll, Ep, Tj, Rm					incepe sa ploua la mijlocul transectului	innorat	portiunea de transect intre sosea si capcana 1 este inundata
2016.03.01	01:00:00	23	m	63.2	31.5	26.1	poteca	0.8	a plouat cu intreruperi toata noaptea si ziua	2 Ll, 2 Tj, canta Ll, Ep, Tj, Rm					incepe sa ploua la mijlocul transectului	innorat	portiunea de transect intre sosea si capcana 1 este inundata
2016.03.01	01:00:00	24	m	61.8	28.8	33.5	poteca	0.8	a plouat cu intreruperi toata noaptea si ziua	2 Ll, 2 Tj, canta Ll, Ep, Tj, Rm					incepe sa ploua la mijlocul transectului	innorat	portiunea de transect intre sosea si capcana 1 este inundata
2016.03.01	01:00:00	25	m	65.8	29.6	37.5	apa	0.8	a plouat cu intreruperi toata noaptea si ziua	2 Ll, 2 Tj, canta Ll, Ep, Tj, Rm					incepe sa ploua la mijlocul transectului	innorat	portiunea de transect intre sosea si capcana 1 este inundata
2016.03.01	01:00:00	26	m	59.1	29.7	31.4	apa	0.8	a plouat cu intreruperi toata noaptea si ziua	2 Ll, 2 Tj, canta Ll, Ep, Tj, Rm					incepe sa ploua la mijlocul transectului	innorat	portiunea de transect intre sosea si capcana 1 este inundata
2016.03.01	01:00:00	27	m	62.3	29.7	33.8	apa	0.8	a plouat cu intreruperi toata noaptea si ziua	2 Ll, 2 Tj, canta Ll, Ep, Tj, Rm					incepe sa ploua la mijlocul transectului	innorat	portiunea de transect intre sosea si capcana 1 este inundata
2016.03.01	01:00:00	28	f	57.9	29.4	23.4	ascuns in vegetatie	0.8	a plouat cu intreruperi toata noaptea si ziua	2 Ll, 2 Tj, canta Ll, Ep, Tj, Rm					incepe sa ploua la mijlocul transectului	innorat	portiunea de transect intre sosea si capcana 1 este inundata
2016.03.01	01:00:00	29	j			4.7	ascuns in vegetatie	0.8	a plouat cu intreruperi toata noaptea si ziua	2 Ll, 2 Tj, canta Ll, Ep, Tj, Rm					incepe sa ploua la mijlocul transectului	innorat	portiunea de transect intre sosea si capcana 1 este inundata
2016.03.01	01:00:00	30	m	61.1	28.5	23.9	ascuns in vegetatie	0.8	a plouat cu intreruperi toata noaptea si ziua	2 Ll, 2 Tj, canta Ll, Ep, Tj, Rm					incepe sa ploua la mijlocul transectului	innorat	portiunea de transect intre sosea si capcana 1 este inundata
2016.03.01	01:00:00	31	f	71.4	35.2	40.4	apa	0.8	a plouat cu intreruperi toata noaptea si ziua	2 Ll, 2 Tj, canta Ll, Ep, Tj, Rm					incepe sa ploua la mijlocul transectului	innorat	portiunea de transect intre sosea si capcana 1 este inundata
2016.03.01	01:00:00	32	m	64.2	31.8	37	apa	0.8	a plouat cu intreruperi toata noaptea si ziua	2 Ll, 2 Tj, canta Ll, Ep, Tj, Rm					incepe sa ploua la mijlocul transectului	innorat	portiunea de transect intre sosea si capcana 1 este inundata
2016.03.01	01:00:00	33	m	62.3	31.3	27.9	apa	0.8	a plouat cu intreruperi toata noaptea si ziua	2 Ll, 2 Tj, canta Ll, Ep, Tj, Rm					incepe sa ploua la mijlocul transectului	innorat	portiunea de transect intre sosea si capcana 1 este inundata
2016.03.01	01:00:00	34	m	62.3	29.5	32	poteca	0.8	a plouat cu intreruperi toata noaptea si ziua	2 Ll, 2 Tj, canta Ll, Ep, Tj, Rm					incepe sa ploua la mijlocul transectului	innorat	portiunea de transect intre sosea si capcana 1 este inundata
2016.03.01	01:00:00	35	f	61.6	32.6	26.7	ascuns in vegetatie	0.8	a plouat cu intreruperi toata noaptea si ziua	2 Ll, 2 Tj, canta Ll, Ep, Tj, Rm					incepe sa ploua la mijlocul transectului	innorat	portiunea de transect intre sosea si capcana 1 este inundata
2016.03.01	01:00:00	36	m	61.6	30.3	29.9	ascuns in vegetatie	0.8	a plouat cu intreruperi toata noaptea si ziua	2 Ll, 2 Tj, canta Ll, Ep, Tj, Rm					incepe sa ploua la mijlocul transectului	innorat	portiunea de transect intre sosea si capcana 1 este inundata
2016.03.01	01:00:00	37	m	62.1	29.1	27.3	poteca	0.8	a plouat cu intreruperi toata noaptea si ziua	2 Ll, 2 Tj, canta Ll, Ep, Tj, Rm					incepe sa ploua la mijlocul transectului	innorat	portiunea de transect intre sosea si capcana 1 este inundata
2016.03.02								0.9	a plouat noaptea					nu s-a facut transectul			portiunea de transect intre sosea si capcana 1 este inundata
2016.03.03	03:00:00	1	f	69.1	32	41.5	apa	6.1	a plouat puternic noaptea	1 Rm, 4 Ll, 1 Tj, canta Ep, Tj, Ll					a plouat inainte de transect 20-22	innorat	portiunea de transect intre sosea si capcana 1 este inundata
2016.03.03	03:00:00	2	m	60.3	31.1	21.4	ascuns in vegetatie	6.1	a plouat puternic noaptea	1 Rm, 4 Ll, 1 Tj, canta Ep, Tj, Ll					a plouat inainte de transect 20-22	innorat	portiunea de transect intre sosea si capcana 1 este inundata
2016.03.03	03:00:00	3	f	56.5	27.3	18.2	ascuns in vegetatie	6.1	a plouat puternic noaptea	1 Rm, 4 Ll, 1 Tj, canta Ep, Tj, Ll					a plouat inainte de transect 20-22	innorat	portiunea de transect intre sosea si capcana 1 este inundata
2016.03.03	03:00:00	4	f	65.8	30.7	36.5	ascuns in vegetatie	6.1	a plouat puternic noaptea	1 Rm, 4 Ll, 1 Tj, canta Ep, Tj, Ll					a plouat inainte de transect 20-22	innorat	portiunea de transect intre sosea si capcana 1 este inundata
2016.03.03	03:00:00	5	f	64.9	32	34.9	ascuns in vegetatie	6.1	a plouat puternic noaptea	1 Rm, 4 Ll, 1 Tj, canta Ep, Tj, Ll					a plouat inainte de transect 20-22	innorat	portiunea de transect intre sosea si capcana 1 este inundata
2016.03.03	03:00:00	6	m	64.4	30.3	34.4	ascuns in vegetatie	6.1	a plouat puternic noaptea	1 Rm, 4 Ll, 1 Tj, canta Ep, Tj, Ll					a plouat inainte de transect 20-22	innorat	portiunea de transect intre sosea si capcana 1 este inundata
2016.03.03	03:00:00	7	f	62.4	32.1	28	ascuns in vegetatie	6.1	a plouat puternic noaptea	1 Rm, 4 Ll, 1 Tj, canta Ep, Tj, Ll					a plouat inainte de transect 20-22	innorat	portiunea de transect intre sosea si capcana 1 este inundata
2016.03.03	03:00:00	8	f	63	31.9	30.5	apa	6.1	a plouat puternic noaptea	1 Rm, 4 Ll, 1 Tj, canta Ep, Tj, Ll					a plouat inainte de transect 20-22	innorat	portiunea de transect intre sosea si capcana 1 este inundata
2016.03.03	03:00:00	9	f	63.8	31.5	30	poteca	6.1	a plouat puternic noaptea	1 Rm, 4 Ll, 1 Tj, canta Ep, Tj, Ll					a plouat inainte de transect 20-22	innorat	portiunea de transect intre sosea si capcana 1 este inundata
2016.03.03	03:00:00	10	f	65.6	30.3	36.2	poteca	6.1	a plouat puternic noaptea	1 Rm, 4 Ll, 1 Tj, canta Ep, Tj, Ll					a plouat inainte de transect 20-22	innorat	portiunea de transect intre sosea si capcana 1 este inundata
2016.03.03	03:00:00	11	m	67.1	31.3	37.9	poteca	6.1	a plouat puternic noaptea	1 Rm, 4 Ll, 1 Tj, canta Ep, Tj, Ll					a plouat inainte de transect 20-22	innorat	portiunea de transect intre sosea si capcana 1 este inundata
2016.03.03	03:00:00	12	m	60.5	28.7	30.8	poteca	6.1	a plouat puternic noaptea	1 Rm, 4 Ll, 1 Tj, canta Ep, Tj, Ll					a plouat inainte de transect 20-22	innorat	portiunea de transect intre sosea si capcana 1 este inundata
2016.03.03	03:00:00	13	f	65.2	30.1	32.7	poteca	6.1	a plouat puternic noaptea	1 Rm, 4 Ll, 1 Tj, canta Ep, Tj, Ll					a plouat inainte de transect 20-22	innorat	portiunea de transect intre sosea si capcana 1 este inundata
2016.03.03	03:00:00	14	f	66.7	31	36.1	poteca	6.1	a plouat puternic noaptea	1 Rm, 4 Ll, 1 Tj, canta Ep, Tj, Ll					a plouat inainte de transect 20-22	innorat	portiunea de transect intre sosea si capcana 1 este inundata
2016.03.03	03:00:00	15	m	63.8	31.7	32.1	poteca	6.1	a plouat puternic noaptea	1 Rm, 4 Ll, 1 Tj, canta Ep, Tj, Ll					a plouat inainte de transect 20-22	innorat	portiunea de transect intre sosea si capcana 1 este inundata
2016.03.03	03:00:00	16	m	63.5	30.2	33	apa	6.1	a plouat puternic noaptea	1 Rm, 4 Ll, 1 Tj, canta Ep, Tj, Ll					a plouat inainte de transect 20-22	innorat	portiunea de transect intre sosea si capcana 1 este inundata
2016.03.03	03:00:00	17	f	65.4	31.9	31.3	apa	6.1	a plouat puternic noaptea	1 Rm, 4 Ll, 1 Tj, canta Ep, Tj, Ll					a plouat inainte de transect 20-22	innorat	portiunea de transect intre sosea si capcana 1 este inundata
2016.03.03	03:00:00	18	m	62.7	30.3	27.4	apa	6.1	a plouat puternic noaptea	1 Rm, 4 Ll, 1 Tj, canta Ep, Tj, Ll					a plouat inainte de transect 20-22	innorat	portiunea de transect intre sosea si capcana 1 este inundata
2016.03.03	03:00:00	19	f	69.9	31.7	40.6	apa	6.1	a plouat puternic noaptea	1 Rm, 4 Ll, 1 Tj, canta Ep, Tj, Ll					a plouat inainte de transect 20-22	innorat	portiunea de transect intre sosea si capcana 1 este inundata
2016.03.03	03:00:00	20	m	62.4	31.6	24.2	apa	6.1	a plouat puternic noaptea	1 Rm, 4 Ll, 1 Tj, canta Ep, Tj, Ll					a plouat inainte de transect 20-22	innorat	portiunea de transect intre sosea si capcana 1 este inundata
2016.03.03	03:00:00	21	f	66.5	33.4	33.5	apa	6.1	a plouat puternic noaptea	1 Rm, 4 Ll, 1 Tj, canta Ep, Tj, Ll					a plouat inainte de transect 20-22	innorat	portiunea de transect intre sosea si capcana 1 este inundata
2016.03.03	03:00:00	22	m	62.1	29.3	27	apa	6.1	a plouat puternic noaptea	1 Rm, 4 Ll, 1 Tj, canta Ep, Tj, Ll			marcat		a plouat inainte de transect 20-22	innorat	portiunea de transect intre sosea si capcana 1 este inundata
2016.03.03	03:00:00	23	f	65.7	34	42.3	poteca	6.1	a plouat puternic noaptea	1 Rm, 4 Ll, 1 Tj, canta Ep, Tj, Ll					a plouat inainte de transect 20-22	innorat	portiunea de transect intre sosea si capcana 1 este inundata
2016.03.03	03:00:00	24	m	60	26.8	23.6	poteca	6.1	a plouat puternic noaptea	1 Rm, 4 Ll, 1 Tj, canta Ep, Tj, Ll					a plouat inainte de transect 20-22	innorat	portiunea de transect intre sosea si capcana 1 este inundata
2016.03.03	03:00:00	25	m	57.3	28.1	18.1	ascuns in vegetatie	6.1	a plouat puternic noaptea	1 Rm, 4 Ll, 1 Tj, canta Ep, Tj, Ll					a plouat inainte de transect 20-22	innorat	portiunea de transect intre sosea si capcana 1 este inundata
2016.03.03	03:00:00	26	m	66.7	30.6	31.4	poteca	6.1	a plouat puternic noaptea	1 Rm, 4 Ll, 1 Tj, canta Ep, Tj, Ll					a plouat inainte de transect 20-22	innorat	portiunea de transect intre sosea si capcana 1 este inundata
2016.03.03	03:00:00	27	f	63.4	31.6	31.9	poteca	6.1	a plouat puternic noaptea	1 Rm, 4 Ll, 1 Tj, canta Ep, Tj, Ll					a plouat inainte de transect 20-22	innorat	portiunea de transect intre sosea si capcana 1 este inundata
2016.03.03	03:00:00	28	f	68.3	31.4	31.9	poteca	6.1	a plouat puternic noaptea	1 Rm, 4 Ll, 1 Tj, canta Ep, Tj, Ll			marcat		a plouat inainte de transect 20-22	innorat	portiunea de transect intre sosea si capcana 1 este inundata
2016.03.04								0.7	a plouat noaptea					nu s-a facut transectul			portiunea de transect intre sosea si capcana 1 este inundata
2016.03.05	05:00:00	1	m	63.1	29.5	30.6	ascuns in vegetatie	1.1	a plouat puternic noaptea	canta Ll, Ep, Tj				parte din transect dupa capcana 2 nu sa- putut face din cauza unui copac cazut	a plouat puternic inainte si putin pe timpul transectului	inorat	portiunea de transect intre sosea si capcana 1 este inundata
2016.03.05	05:00:00	2	m	63.5	29.7	31.2	poteca	1.1	a plouat puternic noaptea	canta Ll, Ep, Tj				parte din transect dupa capcana 2 nu sa- putut face din cauza unui copac cazut	a plouat puternic inainte si putin pe timpul transectului	inorat	portiunea de transect intre sosea si capcana 1 este inundata
2016.03.05	05:00:00	3	m	66.7	31.7	37.4	poteca	1.1	a plouat puternic noaptea	canta Ll, Ep, Tj				parte din transect dupa capcana 2 nu sa- putut face din cauza unui copac cazut	a plouat puternic inainte si putin pe timpul transectului	inorat	portiunea de transect intre sosea si capcana 1 este inundata
2016.03.05	05:00:00	4	m	62.7	29.6	30.7	poteca	1.1	a plouat puternic noaptea	canta Ll, Ep, Tj				parte din transect dupa capcana 2 nu sa- putut face din cauza unui copac cazut	a plouat puternic inainte si putin pe timpul transectului	inorat	portiunea de transect intre sosea si capcana 1 este inundata
2016.03.05	05:00:00	5	m	66.4	30.7	36	poteca	1.1	a plouat puternic noaptea	canta Ll, Ep, Tj				parte din transect dupa capcana 2 nu sa- putut face din cauza unui copac cazut	a plouat puternic inainte si putin pe timpul transectului	inorat	portiunea de transect intre sosea si capcana 1 este inundata
2016.03.05	05:00:00	6	f	62.6	26.4	32.2	poteca	1.1	a plouat puternic noaptea	canta Ll, Ep, Tj				parte din transect dupa capcana 2 nu sa- putut face din cauza unui copac cazut	a plouat puternic inainte si putin pe timpul transectului	inorat	portiunea de transect intre sosea si capcana 1 este inundata
2016.03.05	05:00:00	7	f	61.8	28.2	27.8	poteca	1.1	a plouat puternic noaptea	canta Ll, Ep, Tj			marcat	parte din transect dupa capcana 2 nu sa- putut face din cauza unui copac cazut	a plouat puternic inainte si putin pe timpul transectului	inorat	portiunea de transect intre sosea si capcana 1 este inundata
2016.03.05	05:00:00	8	m	66.1	31.8	38.1	poteca	1.1	a plouat puternic noaptea	canta Ll, Ep, Tj				parte din transect dupa capcana 2 nu sa- putut face din cauza unui copac cazut	a plouat puternic inainte si putin pe timpul transectului	inorat	portiunea de transect intre sosea si capcana 1 este inundata
2016.03.05	05:00:00	9	f	64.6	30.3	30.8	poteca	1.1	a plouat puternic noaptea	canta Ll, Ep, Tj				parte din transect dupa capcana 2 nu sa- putut face din cauza unui copac cazut	a plouat puternic inainte si putin pe timpul transectului	inorat	portiunea de transect intre sosea si capcana 1 este inundata
2016.03.05	05:00:00	10	m	65.4	31.1	32.4	poteca	1.1	a plouat puternic noaptea	canta Ll, Ep, Tj				parte din transect dupa capcana 2 nu sa- putut face din cauza unui copac cazut	a plouat puternic inainte si putin pe timpul transectului	inorat	portiunea de transect intre sosea si capcana 1 este inundata
2016.03.05	05:00:00	11	m	62.1	30.2	28.7	poteca	1.1	a plouat puternic noaptea	canta Ll, Ep, Tj				parte din transect dupa capcana 2 nu sa- putut face din cauza unui copac cazut	a plouat puternic inainte si putin pe timpul transectului	inorat	portiunea de transect intre sosea si capcana 1 este inundata
2016.03.05	05:00:00	12						1.1	a plouat puternic noaptea	canta Ll, Ep, Tj			pierdut	parte din transect dupa capcana 2 nu sa- putut face din cauza unui copac cazut	a plouat puternic inainte si putin pe timpul transectului	inorat	portiunea de transect intre sosea si capcana 1 este inundata
2016.03.05	05:00:00	13	f	62.9	27.5	27.7	poteca	1.1	a plouat puternic noaptea	canta Ll, Ep, Tj				parte din transect dupa capcana 2 nu sa- putut face din cauza unui copac cazut	a plouat puternic inainte si putin pe timpul transectului	inorat	portiunea de transect intre sosea si capcana 1 este inundata
2016.03.05	05:00:00	14	f	63.4	30.1	25.6	poteca	1.1	a plouat puternic noaptea	canta Ll, Ep, Tj				parte din transect dupa capcana 2 nu sa- putut face din cauza unui copac cazut	a plouat puternic inainte si putin pe timpul transectului	inorat	portiunea de transect intre sosea si capcana 1 este inundata
2016.03.05	05:00:00	15	f	61.8	28.8	28.5	poteca	1.1	a plouat puternic noaptea	canta Ll, Ep, Tj				parte din transect dupa capcana 2 nu sa- putut face din cauza unui copac cazut	a plouat puternic inainte si putin pe timpul transectului	inorat	portiunea de transect intre sosea si capcana 1 este inundata
2016.03.05	05:00:00	16	f	65.2	31.6	37.2	apa	1.1	a plouat puternic noaptea	canta Ll, Ep, Tj				parte din transect dupa capcana 2 nu sa- putut face din cauza unui copac cazut	a plouat puternic inainte si putin pe timpul transectului	inorat	portiunea de transect intre sosea si capcana 1 este inundata
2016.03.05	05:00:00	17	f	63.1	30.5	33.6	apa	1.1	a plouat puternic noaptea	canta Ll, Ep, Tj				parte din transect dupa capcana 2 nu sa- putut face din cauza unui copac cazut	a plouat puternic inainte si putin pe timpul transectului	inorat	portiunea de transect intre sosea si capcana 1 este inundata
2016.03.05	05:00:00	18	f	67.2	32.2	34.9	poteca	1.1	a plouat puternic noaptea	canta Ll, Ep, Tj				parte din transect dupa capcana 2 nu sa- putut face din cauza unui copac cazut	a plouat puternic inainte si putin pe timpul transectului	inorat	portiunea de transect intre sosea si capcana 1 este inundata
2016.03.05	05:00:00	19	f	63.5	31.9	27.1	poteca	1.1	a plouat puternic noaptea	canta Ll, Ep, Tj				parte din transect dupa capcana 2 nu sa- putut face din cauza unui copac cazut	a plouat puternic inainte si putin pe timpul transectului	inorat	portiunea de transect intre sosea si capcana 1 este inundata
2016.03.06	17:00:00	0						3.1	a plouat puternic noaptea	canta Ll, Ep, Sq						senin	portiunea de transect intre sosea si capcana 1 este inundata
2016.03.07	19:00:00	1	m	57.2	29	25.2	ascuns in vegetatie	0		3 Ll, 2 Tj, canta Ep, Er, Ll						50% senin	portiunea de transect intre sosea si capcana 1 este inundata
2016.03.07	19:00:00	2	m	61.5	26.6	27.8	ascuns in vegetatie	0		3 Ll, 2 Tj, canta Ep, Er, Ll						50% senin	portiunea de transect intre sosea si capcana 1 este inundata
2016.03.07	19:00:00	3	f	63.1	31.8	31.2	ascuns in vegetatie	0		3 Ll, 2 Tj, canta Ep, Er, Ll						50% senin	portiunea de transect intre sosea si capcana 1 este inundata
2016.03.07	19:00:00	4	f	66.6	32.3	44.6	apa	0		3 Ll, 2 Tj, canta Ep, Er, Ll						50% senin	portiunea de transect intre sosea si capcana 1 este inundata
2016.03.07	19:00:00	5	f	64.7	31.5	28.3	apa	0		3 Ll, 2 Tj, canta Ep, Er, Ll						50% senin	portiunea de transect intre sosea si capcana 1 este inundata
2016.03.07	19:00:00	6	m	65.3	32.6	30.9	apa	0		3 Ll, 2 Tj, canta Ep, Er, Ll						50% senin	portiunea de transect intre sosea si capcana 1 este inundata
2016.03.08	21:00:00	1	f	65.6	31.6	36	apa	0		4 Ll, 6 Ep, canta Ep, Ll, Rm						20 - 50 % senin	portiunea de transect intre sosea si capcana 1 este inundata
2016.03.08	21:00:00	2	m	63.6	29.9	32.6	ascuns in vegetatie	0		4 Ll, 6 Ep, canta Ep, Ll, Rm						20 - 50 % senin	portiunea de transect intre sosea si capcana 1 este inundata
2016.03.08	21:00:00	3	m	61.5	29.1	30.2	poteca	0		4 Ll, 6 Ep, canta Ep, Ll, Rm						20 - 50 % senin	portiunea de transect intre sosea si capcana 1 este inundata
2016.03.08	21:00:00	4	m	63.3	30.8	27.2	poteca	0		4 Ll, 6 Ep, canta Ep, Ll, Rm						20 - 50 % senin	portiunea de transect intre sosea si capcana 1 este inundata
2016.03.08	21:00:00	5	f	63.2	31.2	23.2	poteca	0		4 Ll, 6 Ep, canta Ep, Ll, Rm						20 - 50 % senin	portiunea de transect intre sosea si capcana 1 este inundata
2016.03.08	21:00:00	6	m	62.4	31.3	26	ascuns in vegetatie	0		4 Ll, 6 Ep, canta Ep, Ll, Rm						20 - 50 % senin	portiunea de transect intre sosea si capcana 1 este inundata
2016.03.08	21:00:00	7	m	65.4	30.7	26.2	ascuns in vegetatie	0		4 Ll, 6 Ep, canta Ep, Ll, Rm						20 - 50 % senin	portiunea de transect intre sosea si capcana 1 este inundata
2016.03.08	21:00:00	8	m	62.8	29.9	28.4	ascuns in vegetatie	0		4 Ll, 6 Ep, canta Ep, Ll, Rm						20 - 50 % senin	portiunea de transect intre sosea si capcana 1 este inundata
2016.03.09	23:00:00	1	f	64.3	32	33.7	poteca	0		7 Ll si multi metamorfi, 2 Tj, canta Sq, Ll, EP, Rm						innorat	portiunea de transect intre sosea si capcana 1 este inundata
2016.03.09	23:00:00	2	f	57.4	27.8	22.3	apa	0		7 Ll si multi metamorfi, 2 Tj, canta Sq, Ll, EP, Rm						innorat	portiunea de transect intre sosea si capcana 1 este inundata
2016.03.09	23:00:00	3	f	58.7	28.5	23.8	poteca	0		7 Ll si multi metamorfi, 2 Tj, canta Sq, Ll, EP, Rm						innorat	portiunea de transect intre sosea si capcana 1 este inundata
2016.03.09	23:00:00	4	f	60.5	29.8	25.8	apa	0		7 Ll si multi metamorfi, 2 Tj, canta Sq, Ll, EP, Rm						innorat	portiunea de transect intre sosea si capcana 1 este inundata
2016.03.09	23:00:00	5	f	63.6	29.7	35.4	apa	0		7 Ll si multi metamorfi, 2 Tj, canta Sq, Ll, EP, Rm						innorat	portiunea de transect intre sosea si capcana 1 este inundata
2016.03.09	23:00:00	6	m	64.4	32.5	36.7	apa	0		7 Ll si multi metamorfi, 2 Tj, canta Sq, Ll, EP, Rm						innorat	portiunea de transect intre sosea si capcana 1 este inundata
2016.03.09	23:00:00	7	m	59.6	27.5	24.4	poteca	0		7 Ll si multi metamorfi, 2 Tj, canta Sq, Ll, EP, Rm						innorat	portiunea de transect intre sosea si capcana 1 este inundata
2016.03.09	23:00:00	8	f	63.7	33.2	31.6	ascuns in vegetatie	0		7 Ll si multi metamorfi, 2 Tj, canta Sq, Ll, EP, Rm						innorat	portiunea de transect intre sosea si capcana 1 este inundata
2016.03.09	23:00:00	9	m	62.3	29.2	23.9	ascuns in vegetatie	0		7 Ll si multi metamorfi, 2 Tj, canta Sq, Ll, EP, Rm						innorat	portiunea de transect intre sosea si capcana 1 este inundata
2016.03.09	23:00:00	10	f	62.5	30.2	21.2	poteca	0		7 Ll si multi metamorfi, 2 Tj, canta Sq, Ll, EP, Rm						innorat	portiunea de transect intre sosea si capcana 1 este inundata
2016.03.09	23:00:00	11	m	62.2	29.1	25.7	ascuns in vegetatie	0		7 Ll si multi metamorfi, 2 Tj, canta Sq, Ll, EP, Rm			marcat			innorat	portiunea de transect intre sosea si capcana 1 este inundata
2016.03.09	23:00:00	12	m	62.3	26.3	22.5	poteca	0		7 Ll si multi metamorfi, 2 Tj, canta Sq, Ll, EP, Rm						innorat	portiunea de transect intre sosea si capcana 1 este inundata
2016.03.09	23:00:00	13	f	66.9	31.3	38.6	ascuns in vegetatie	0		7 Ll si multi metamorfi, 2 Tj, canta Sq, Ll, EP, Rm						innorat	portiunea de transect intre sosea si capcana 1 este inundata
2016.03.09	23:00:00	14	f	59.5	28.7	25.6	ascuns in vegetatie	0		CS G42!!! 7 Ll si multi metamorfi, 2 Tj, canta Sq, Ll, EP, Rm						innorat	portiunea de transect intre sosea si capcana 1 este inundata
2016.03.10	01:00:00	1	m	63.6	30.5	28.6	poteca	0		6Ll + metamorfi, 2 Tj, canta Sq, Rm, Ll						innorat	portiunea de transect intre sosea si capcana 1 este inundata
2016.03.10	01:00:00	2	m	64	29.5	24.4	ascuns in vegetatie	0		6Ll + metamorfi, 2 Tj, canta Sq, Rm, Ll						innorat	portiunea de transect intre sosea si capcana 1 este inundata
2016.03.10	01:00:00	3	f	62.7	30.6	23.6	poteca	0		6Ll + metamorfi, 2 Tj, canta Sq, Rm, Ll						innorat	portiunea de transect intre sosea si capcana 1 este inundata
2016.03.10	01:00:00	4	m	63.6	31.1	29.8	ascuns in vegetatie	0		6Ll + metamorfi, 2 Tj, canta Sq, Rm, Ll						innorat	portiunea de transect intre sosea si capcana 1 este inundata
2016.03.10	01:00:00	5	m	62.8	31.7	27.7	ascuns in vegetatie	0		6Ll + metamorfi, 2 Tj, canta Sq, Rm, Ll			marcat			innorat	portiunea de transect intre sosea si capcana 1 este inundata
2016.03.10	01:00:00	6	m	64.7	31.8	29.1	poteca	0		6Ll + metamorfi, 2 Tj, canta Sq, Rm, Ll						innorat	portiunea de transect intre sosea si capcana 1 este inundata
2016.03.10	01:00:00	7	f ?	68.6	32.7	35.6	ascuns in vegetatie	0		6Ll + metamorfi, 2 Tj, canta Sq, Rm, Ll						innorat	portiunea de transect intre sosea si capcana 1 este inundata
2016.03.10	01:00:00	8	m	61.6	29.7	26	poteca	0		6Ll + metamorfi, 2 Tj, canta Sq, Rm, Ll						innorat	portiunea de transect intre sosea si capcana 1 este inundata
2016.03.10	01:00:00	9	m	61.6	29	23.6	poteca	0		6Ll + metamorfi, 2 Tj, canta Sq, Rm, Ll			marcat			innorat	portiunea de transect intre sosea si capcana 1 este inundata
2016.03.10	01:00:00	10	mt	29.3	14.9	2.3	poteca	0		6Ll + metamorfi, 2 Tj, canta Sq, Rm, Ll						innorat	portiunea de transect intre sosea si capcana 1 este inundata
2016.03.10	01:00:00	11	f	61.6	27.4	28.3	apa	0		6Ll + metamorfi, 2 Tj, canta Sq, Rm, Ll						innorat	portiunea de transect intre sosea si capcana 1 este inundata
2016.03.10	01:00:00	12	m	63.4	31	29.1	apa	0		6Ll + metamorfi, 2 Tj, canta Sq, Rm, Ll						innorat	portiunea de transect intre sosea si capcana 1 este inundata
2016.03.10	01:00:00	13	m	63.8	28.8	28	ascuns in vegetatie	0		6Ll + metamorfi, 2 Tj, canta Sq, Rm, Ll						innorat	portiunea de transect intre sosea si capcana 1 este inundata
2016.03.10	01:00:00	14	m	61.6	27.7	23.5	poteca	0		6Ll + metamorfi, 2 Tj, canta Sq, Rm, Ll						innorat	portiunea de transect intre sosea si capcana 1 este inundata
2016.03.11	16:30:00	15	mt	25.1	11.8	2.2	poteca	0.01	a plouat putin 15-16	metamorfi Ll						innorat	portiunea de transect intre sosea si capcana 1 este inundata
2016.03.11	16:30:00	16	mt	26.2	13.7	2	poteca	0.01	a plouat putin 15-16	metamorfi Ll						innorat	portiunea de transect intre sosea si capcana 1 este inundata
2016.03.11	16:30:00	17	mt	25.1	13.6	1.9	poteca	0.01	a plouat putin 15-16	metamorfi Ll						innorat	portiunea de transect intre sosea si capcana 1 este inundata
2016.03.11	16:30:00	18	mt	31.8	15.9	2.8	ascuns in vegetatie	0.01	a plouat putin 15-16	metamorfi Ll						innorat	portiunea de transect intre sosea si capcana 1 este inundata
2016.03.11	16:30:00	19	mt	28.1		2.2	ascuns in vegetatie	0.01	a plouat putin 15-16	metamorfi Ll						innorat	portiunea de transect intre sosea si capcana 1 este inundata
2016.03.11	16:30:00	20	mt	27.4			ascuns in vegetatie	0.01	a plouat putin 15-16	metamorfi Ll						innorat	portiunea de transect intre sosea si capcana 1 este inundata
2016.03.11	16:30:00	21	mt	26.2			ascuns in vegetatie	0.01	a plouat putin 15-16	metamorfi Ll						innorat	portiunea de transect intre sosea si capcana 1 este inundata
2016.03.11	03:00:00	1	m	62.5	29.2	28	ascuns in vegetatie	0.01	a plouat putin 15-16	2Ll, metamorfi Ll, canta Sq, Ll, Er					a plouat putin seara, 19-21	innorat	portiunea de transect intre sosea si capcana 1 este inundata
2016.03.11	03:00:00	2	f	62.5	32.7	21.7	ascuns in vegetatie	0.01	a plouat putin 15-16	2Ll, metamorfi Ll, canta Sq, Ll, Er					a plouat putin seara, 19-21	innorat	portiunea de transect intre sosea si capcana 1 este inundata
2016.03.11	03:00:00	3	f	54.5	27.8	17.3	ascuns in vegetatie	0.01	a plouat putin 15-16	2Ll, metamorfi Ll, canta Sq, Ll, Er					a plouat putin seara, 19-21	innorat	portiunea de transect intre sosea si capcana 1 este inundata
2016.03.11	03:00:00	4	f	58.9	27.8	20.7	poteca	0.01	a plouat putin 15-16	2Ll, metamorfi Ll, canta Sq, Ll, Er					a plouat putin seara, 19-21	innorat	portiunea de transect intre sosea si capcana 1 este inundata
2016.03.11	03:00:00	5	f	61.1	28.7	25.1	ascuns in vegetatie	0.01	a plouat putin 15-16	2Ll, metamorfi Ll, canta Sq, Ll, Er					a plouat putin seara, 19-21	innorat	portiunea de transect intre sosea si capcana 1 este inundata
2016.03.11	03:00:00	6	m	69.3	31.2	35.5	ascuns in vegetatie	0.01	a plouat putin 15-16	2Ll, metamorfi Ll, canta Sq, Ll, Er					a plouat putin seara, 19-21	innorat	portiunea de transect intre sosea si capcana 1 este inundata
2016.03.11	03:00:00	7	m	66.9	32	35.1	ascuns in vegetatie	0.01	a plouat putin 15-16	2Ll, metamorfi Ll, canta Sq, Ll, Er					a plouat putin seara, 19-21	innorat	portiunea de transect intre sosea si capcana 1 este inundata
2016.03.11	03:00:00	8	mt	28.1	15.1	2.4	poteca	0.01	a plouat putin 15-16	2Ll, metamorfi Ll, canta Sq, Ll, Er					a plouat putin seara, 19-21	innorat	portiunea de transect intre sosea si capcana 1 este inundata
2016.03.11	03:00:00	9	mt	29.2	16.3	3.1	ascuns in vegetatie	0.01	a plouat putin 15-16	2Ll, metamorfi Ll, canta Sq, Ll, Er					a plouat putin seara, 19-21	innorat	portiunea de transect intre sosea si capcana 1 este inundata
2016.03.11	03:00:00	10	mt	34.8	18.5	4.6	poteca	0.01	a plouat putin 15-16	2Ll, metamorfi Ll, canta Sq, Ll, Er					a plouat putin seara, 19-21	innorat	portiunea de transect intre sosea si capcana 1 este inundata
2016.03.11	03:00:00	11	mt	31.1	17.6	3.4	poteca	0.01	a plouat putin 15-16	2Ll, metamorfi Ll, canta Sq, Ll, Er					a plouat putin seara, 19-21	innorat	portiunea de transect intre sosea si capcana 1 este inundata
2016.03.11	03:00:00	12	mt	30.9	15.9	2.8	poteca	0.01	a plouat putin 15-16	2Ll, metamorfi Ll, canta Sq, Ll, Er					a plouat putin seara, 19-21	innorat	portiunea de transect intre sosea si capcana 1 este inundata
2016.03.11	03:00:00	13	mt	29.7	15.3	2.7	poteca	0.01	a plouat putin 15-16	2Ll, metamorfi Ll, canta Sq, Ll, Er					a plouat putin seara, 19-21	innorat	portiunea de transect intre sosea si capcana 1 este inundata
2016.03.11	03:00:00	14	mt	31.7	17.4	2.9	poteca	0.01	a plouat putin 15-16	2Ll, metamorfi Ll, canta Sq, Ll, Er					a plouat putin seara, 19-21	innorat	portiunea de transect intre sosea si capcana 1 este inundata
2016.03.11	03:00:00	15	m	63.7	31.7	26.8	ascuns in vegetatie	0.01	a plouat putin 15-16	2Ll, metamorfi Ll, canta Sq, Ll, Er					a plouat putin seara, 19-21	innorat	portiunea de transect intre sosea si capcana 1 este inundata
2016.03.11	03:00:00	16	mt	29.6	16.8	2.4	poteca	0.01	a plouat putin 15-16	2Ll, metamorfi Ll, canta Sq, Ll, Er					a plouat putin seara, 19-21	innorat	portiunea de transect intre sosea si capcana 1 este inundata
2016.03.11	03:00:00	17	mt	29.5				0.01	a plouat putin 15-16	2Ll, metamorfi Ll, canta Sq, Ll, Er					a plouat putin seara, 19-21	innorat	portiunea de transect intre sosea si capcana 1 este inundata
2016.03.11	03:00:00	18	mt	27.2				0.01	a plouat putin 15-16	2Ll, metamorfi Ll, canta Sq, Ll, Er					a plouat putin seara, 19-21	innorat	portiunea de transect intre sosea si capcana 1 este inundata
2016.03.11	03:00:00	19	f	56.3	26.6	20.1	poteca	0.01	a plouat putin 15-16	2Ll, metamorfi Ll, canta Sq, Ll, Er					a plouat putin seara, 19-21	innorat	portiunea de transect intre sosea si capcana 1 este inundata
2016.03.11	03:00:00	20	m	64.3	29.5	29.9	poteca	0.01	a plouat putin 15-16	2Ll, metamorfi Ll, canta Sq, Ll, Er					a plouat putin seara, 19-21	innorat	portiunea de transect intre sosea si capcana 1 este inundata
2016.03.11	03:00:00	21	f?	59.9	26.7	23.8	ascuns in vegetatie	0.01	a plouat putin 15-16	2Ll, metamorfi Ll, canta Sq, Ll, Er					a plouat putin seara, 19-21	innorat	portiunea de transect intre sosea si capcana 1 este inundata
2016.03.11	03:00:00	22	f	62.5	30.4	22.5	poteca	0.01	a plouat putin 15-16	2Ll, metamorfi Ll, canta Sq, Ll, Er					a plouat putin seara, 19-21	innorat	portiunea de transect intre sosea si capcana 1 este inundata
2016.03.11	03:00:00	23					ascuns in vegetatie	0.01	a plouat putin 15-16	2Ll, metamorfi Ll, canta Sq, Ll, Er			pierdut		a plouat putin seara, 19-21	innorat	portiunea de transect intre sosea si capcana 1 este inundata
2016.03.11	03:00:00	24	m	62.9	30.3	27.3	ascuns in vegetatie	0.01	a plouat putin 15-16	2Ll, metamorfi Ll, canta Sq, Ll, Er			marcat		a plouat putin seara, 19-21	innorat	portiunea de transect intre sosea si capcana 1 este inundata
2016.03.11	03:00:00	25	m	58.8	29.9	20.9	ascuns in vegetatie	0.01	a plouat putin 15-16	2Ll, metamorfi Ll, canta Sq, Ll, Er					a plouat putin seara, 19-21	innorat	portiunea de transect intre sosea si capcana 1 este inundata
2016.03.11	03:00:00	26	f	64.6	33.5	31.7	poteca	0.01	a plouat putin 15-16	2Ll, metamorfi Ll, canta Sq, Ll, Er					a plouat putin seara, 19-21	innorat	portiunea de transect intre sosea si capcana 1 este inundata
2016.03.11	03:00:00	27					ascuns in vegetatie	0.01	a plouat putin 15-16	2Ll, metamorfi Ll, canta Sq, Ll, Er			pierdut		a plouat putin seara, 19-21	innorat	portiunea de transect intre sosea si capcana 1 este inundata
2016.03.11	03:00:00	28	m	25.1	30.9	26.7	poteca	0.01	a plouat putin 15-16	2Ll, metamorfi Ll, canta Sq, Ll, Er					a plouat putin seara, 19-21	innorat	portiunea de transect intre sosea si capcana 1 este inundata
2016.03.11	03:00:00	29	f	62.4	30.3	27.8	poteca	0.01	a plouat putin 15-16	2Ll, metamorfi Ll, canta Sq, Ll, Er					a plouat putin seara, 19-21	innorat	portiunea de transect intre sosea si capcana 1 este inundata
2016.03.12	17:00:00	1	mt					0.01	a plouat seara anterioara				pierdut	ATENTIE!!! Datele de gps sunt gresite, apar cu o ora mai tarziu decat in realitate		senin	portiunea de transect intre sosea si capcana 1 este inundata
2016.03.12	17:00:00	2	mt	29.6	16.8	2.3	poteca	0.01	a plouat seara anterioara					ATENTIE!!! Datele de gps sunt gresite, apar cu o ora mai tarziu decat in realitate		senin	portiunea de transect intre sosea si capcana 1 este inundata
2016.03.12	17:00:00	3	mt	26.6	14.2	1.9	poteca	0.01	a plouat seara anterioara					ATENTIE!!! Datele de gps sunt gresite, apar cu o ora mai tarziu decat in realitate		senin	portiunea de transect intre sosea si capcana 1 este inundata
2016.03.12	17:00:00	4	mt	28.3	14.3	1.9	poteca	0.01	a plouat seara anterioara					ATENTIE!!! Datele de gps sunt gresite, apar cu o ora mai tarziu decat in realitate		senin	portiunea de transect intre sosea si capcana 1 este inundata
2016.03.12	17:00:00	5	mt	27.4	15.1	1.7	ascuns in vegetatie	0.01	a plouat seara anterioara					ATENTIE!!! Datele de gps sunt gresite, apar cu o ora mai tarziu decat in realitate		senin	portiunea de transect intre sosea si capcana 1 este inundata
2016.03.12	17:00:00	6	mt	28.6	15.5	2.3	poteca	0.01	a plouat seara anterioara					ATENTIE!!! Datele de gps sunt gresite, apar cu o ora mai tarziu decat in realitate		senin	portiunea de transect intre sosea si capcana 1 este inundata
2016.03.12	17:00:00	7	mt	30.4	15.3	2.4	poteca	0.01	a plouat seara anterioara					ATENTIE!!! Datele de gps sunt gresite, apar cu o ora mai tarziu decat in realitate		senin	portiunea de transect intre sosea si capcana 1 este inundata
2016.03.12	17:00:00	8	mt	27	13.8	1.9	poteca	0.01	a plouat seara anterioara					ATENTIE!!! Datele de gps sunt gresite, apar cu o ora mai tarziu decat in realitate		senin	portiunea de transect intre sosea si capcana 1 este inundata
2016.03.12	17:00:00	9	mt	28.5	14.5	2.1	poteca	0.01	a plouat seara anterioara					ATENTIE!!! Datele de gps sunt gresite, apar cu o ora mai tarziu decat in realitate		senin	portiunea de transect intre sosea si capcana 1 este inundata
2016.03.12	17:00:00	10	mt	28.8	15.4	2.4	poteca	0.01	a plouat seara anterioara					ATENTIE!!! Datele de gps sunt gresite, apar cu o ora mai tarziu decat in realitate		senin	portiunea de transect intre sosea si capcana 1 este inundata
2016.03.12	17:00:00	11	mt	28.9	15.9	2.3	poteca	0.01	a plouat seara anterioara					ATENTIE!!! Datele de gps sunt gresite, apar cu o ora mai tarziu decat in realitate		senin	portiunea de transect intre sosea si capcana 1 este inundata
2016.03.12	17:00:00	12	mt				ascuns in vegetatie	0.01	a plouat seara anterioara				pierdut	ATENTIE!!! Datele de gps sunt gresite, apar cu o ora mai tarziu decat in realitate		senin	portiunea de transect intre sosea si capcana 1 este inundata
2016.03.12	17:00:00	13	mt				ascuns in vegetatie	0.01	a plouat seara anterioara				pierdut	ATENTIE!!! Datele de gps sunt gresite, apar cu o ora mai tarziu decat in realitate		senin	portiunea de transect intre sosea si capcana 1 este inundata
2016.03.12	17:00:00	14	mt	29.4	16.4	2.4	ascuns in vegetatie	0.01	a plouat seara anterioara					ATENTIE!!! Datele de gps sunt gresite, apar cu o ora mai tarziu decat in realitate		senin	portiunea de transect intre sosea si capcana 1 este inundata
2016.03.12	17:00:00	15	mt	29.4	15.9	2.4	ascuns in vegetatie	0.01	a plouat seara anterioara					ATENTIE!!! Datele de gps sunt gresite, apar cu o ora mai tarziu decat in realitate		senin	portiunea de transect intre sosea si capcana 1 este inundata
2016.03.12	17:00:00	16	mt	28.2	15.7	2.3	ascuns in vegetatie	0.01	a plouat seara anterioara					ATENTIE!!! Datele de gps sunt gresite, apar cu o ora mai tarziu decat in realitate		senin	portiunea de transect intre sosea si capcana 1 este inundata
2016.03.12	17:00:00	17	mt	26.7		2.2	ascuns in vegetatie	0.01	a plouat seara anterioara					ATENTIE!!! Datele de gps sunt gresite, apar cu o ora mai tarziu decat in realitate		senin	portiunea de transect intre sosea si capcana 1 este inundata
2016.03.12	17:00:00	18	mt	30.1		3.1	ascuns in vegetatie	0.01	a plouat seara anterioara					ATENTIE!!! Datele de gps sunt gresite, apar cu o ora mai tarziu decat in realitate		senin	portiunea de transect intre sosea si capcana 1 este inundata
2016.03.12	17:00:00	19	mt	29.2		2.5	ascuns in vegetatie	0.01	a plouat seara anterioara					ATENTIE!!! Datele de gps sunt gresite, apar cu o ora mai tarziu decat in realitate		senin	portiunea de transect intre sosea si capcana 1 este inundata
2016.03.12	17:00:00	20	mt	27.5		2.1	ascuns in vegetatie	0.01	a plouat seara anterioara					ATENTIE!!! Datele de gps sunt gresite, apar cu o ora mai tarziu decat in realitate		senin	portiunea de transect intre sosea si capcana 1 este inundata
2016.03.12	17:00:00	21	mt	27.6		2.1	ascuns in vegetatie	0.01	a plouat seara anterioara					ATENTIE!!! Datele de gps sunt gresite, apar cu o ora mai tarziu decat in realitate		senin	portiunea de transect intre sosea si capcana 1 este inundata
2016.03.12	17:00:00	22	mt	27.4		2.2	ascuns in vegetatie	0.01	a plouat seara anterioara					ATENTIE!!! Datele de gps sunt gresite, apar cu o ora mai tarziu decat in realitate		senin	portiunea de transect intre sosea si capcana 1 este inundata
2016.03.12	17:00:00	23	mt	27.5		2.3	ascuns in vegetatie	0.01	a plouat seara anterioara					ATENTIE!!! Datele de gps sunt gresite, apar cu o ora mai tarziu decat in realitate		senin	portiunea de transect intre sosea si capcana 1 este inundata
2016.03.12	17:00:00	24	mt	27.4		1.9	ascuns in vegetatie	0.01	a plouat seara anterioara					ATENTIE!!! Datele de gps sunt gresite, apar cu o ora mai tarziu decat in realitate		senin	portiunea de transect intre sosea si capcana 1 este inundata
2016.03.12	17:00:00	25	mt	27.6		2.1	ascuns in vegetatie	0.01	a plouat seara anterioara					ATENTIE!!! Datele de gps sunt gresite, apar cu o ora mai tarziu decat in realitate		senin	portiunea de transect intre sosea si capcana 1 este inundata
2016.03.12	17:00:00	26	mt	28.8		2.5	ascuns in vegetatie	0.01	a plouat seara anterioara					ATENTIE!!! Datele de gps sunt gresite, apar cu o ora mai tarziu decat in realitate		senin	portiunea de transect intre sosea si capcana 1 este inundata
2016.03.12	17:00:00	27	mt	28.4		2.2	ascuns in vegetatie	0.01	a plouat seara anterioara					ATENTIE!!! Datele de gps sunt gresite, apar cu o ora mai tarziu decat in realitate		senin	portiunea de transect intre sosea si capcana 1 este inundata
2016.03.12	17:00:00	28	mt	27.9		2.1	ascuns in vegetatie	0.01	a plouat seara anterioara					ATENTIE!!! Datele de gps sunt gresite, apar cu o ora mai tarziu decat in realitate		senin	portiunea de transect intre sosea si capcana 1 este inundata
2016.03.12	17:00:00	29	mt	31.1		3	ascuns in vegetatie	0.01	a plouat seara anterioara					ATENTIE!!! Datele de gps sunt gresite, apar cu o ora mai tarziu decat in realitate		senin	portiunea de transect intre sosea si capcana 1 este inundata
2016.03.12	17:00:00	30	mt	28.4		2.5	ascuns in vegetatie	0.01	a plouat seara anterioara					ATENTIE!!! Datele de gps sunt gresite, apar cu o ora mai tarziu decat in realitate		senin	portiunea de transect intre sosea si capcana 1 este inundata
2016.03.12	17:00:00	31	mt	28.8		2.1	ascuns in vegetatie	0.01	a plouat seara anterioara					ATENTIE!!! Datele de gps sunt gresite, apar cu o ora mai tarziu decat in realitate		senin	portiunea de transect intre sosea si capcana 1 este inundata
2016.03.12	17:00:00	32	mt	31.4		3.4	ascuns in vegetatie	0.01	a plouat seara anterioara					ATENTIE!!! Datele de gps sunt gresite, apar cu o ora mai tarziu decat in realitate		senin	portiunea de transect intre sosea si capcana 1 este inundata
2016.03.12	17:00:00	33	mt	32.9		3.2	ascuns in vegetatie	0.01	a plouat seara anterioara					ATENTIE!!! Datele de gps sunt gresite, apar cu o ora mai tarziu decat in realitate		senin	portiunea de transect intre sosea si capcana 1 este inundata
2016.03.12	17:00:00	34	mt	31.1		3	ascuns in vegetatie	0.01	a plouat seara anterioara					ATENTIE!!! Datele de gps sunt gresite, apar cu o ora mai tarziu decat in realitate		senin	portiunea de transect intre sosea si capcana 1 este inundata
2016.03.12	17:00:00	35	mt	31.1		2.9	ascuns in vegetatie	0.01	a plouat seara anterioara					ATENTIE!!! Datele de gps sunt gresite, apar cu o ora mai tarziu decat in realitate		senin	portiunea de transect intre sosea si capcana 1 este inundata
2016.03.12	17:00:00	36	mt	30.1		2.9	ascuns in vegetatie	0.01	a plouat seara anterioara					ATENTIE!!! Datele de gps sunt gresite, apar cu o ora mai tarziu decat in realitate		senin	portiunea de transect intre sosea si capcana 1 este inundata
2016.03.12	17:00:00	37	mt	31.4		3.1	ascuns in vegetatie	0.01	a plouat seara anterioara					ATENTIE!!! Datele de gps sunt gresite, apar cu o ora mai tarziu decat in realitate		senin	portiunea de transect intre sosea si capcana 1 este inundata
2016.03.12	17:00:00	38	mt	31.3		3.4	ascuns in vegetatie	0.01	a plouat seara anterioara					ATENTIE!!! Datele de gps sunt gresite, apar cu o ora mai tarziu decat in realitate		senin	portiunea de transect intre sosea si capcana 1 este inundata
2016.03.12	05:00:00	1	mt	28.6	15.9	2.3	poteca	0		2Ll si metamorfi, 1Rm, canta Ll				ATENTIE!!! Datele de gps sunt gresite, apar cu o ora mai tarziu decat in realitate		innorat	portiunea de transect intre sosea si capcana 1 este inundata
2016.03.12	05:00:00	2	mt	25.6	13.4	1.8	poteca	0		2Ll si metamorfi, 1Rm, canta Ll				ATENTIE!!! Datele de gps sunt gresite, apar cu o ora mai tarziu decat in realitate		innorat	portiunea de transect intre sosea si capcana 1 este inundata
2016.03.12	05:00:00	3	mt	26.7	14.5	1.8	poteca	0		2Ll si metamorfi, 1Rm, canta Ll				ATENTIE!!! Datele de gps sunt gresite, apar cu o ora mai tarziu decat in realitate		innorat	portiunea de transect intre sosea si capcana 1 este inundata
2016.03.12	05:00:00	4	mt	26.9	14.7	1.9	ascuns in vegetatie	0		2Ll si metamorfi, 1Rm, canta Ll				ATENTIE!!! Datele de gps sunt gresite, apar cu o ora mai tarziu decat in realitate		innorat	portiunea de transect intre sosea si capcana 1 este inundata
2016.03.12	05:00:00	5	mt	30.8	16.6	2.7	ascuns in vegetatie	0		2Ll si metamorfi, 1Rm, canta Ll				ATENTIE!!! Datele de gps sunt gresite, apar cu o ora mai tarziu decat in realitate		innorat	portiunea de transect intre sosea si capcana 1 este inundata
2016.03.12	05:00:00	6	mt	28.7	15.2	2.3	poteca	0		2Ll si metamorfi, 1Rm, canta Ll				ATENTIE!!! Datele de gps sunt gresite, apar cu o ora mai tarziu decat in realitate		innorat	portiunea de transect intre sosea si capcana 1 este inundata
2016.03.12	05:00:00	7	mt	30.7	16.4	3.3	poteca	0		2Ll si metamorfi, 1Rm, canta Ll				ATENTIE!!! Datele de gps sunt gresite, apar cu o ora mai tarziu decat in realitate		innorat	portiunea de transect intre sosea si capcana 1 este inundata
2016.03.12	05:00:00	8	mt	28.8	14.5	2.2	poteca	0		2Ll si metamorfi, 1Rm, canta Ll				ATENTIE!!! Datele de gps sunt gresite, apar cu o ora mai tarziu decat in realitate		innorat	portiunea de transect intre sosea si capcana 1 este inundata
2016.03.12	05:00:00	9	mt	28.9	15.1	2.2	poteca	0		2Ll si metamorfi, 1Rm, canta Ll				ATENTIE!!! Datele de gps sunt gresite, apar cu o ora mai tarziu decat in realitate		innorat	portiunea de transect intre sosea si capcana 1 este inundata
2016.03.12	05:00:00	10	mt	28.4	14.4	2.4	poteca	0		2Ll si metamorfi, 1Rm, canta Ll				ATENTIE!!! Datele de gps sunt gresite, apar cu o ora mai tarziu decat in realitate		innorat	portiunea de transect intre sosea si capcana 1 este inundata
2016.03.12	05:00:00	11	mt	29.7	17.1	2.4	poteca	0		2Ll si metamorfi, 1Rm, canta Ll				ATENTIE!!! Datele de gps sunt gresite, apar cu o ora mai tarziu decat in realitate		innorat	portiunea de transect intre sosea si capcana 1 este inundata
2016.03.12	05:00:00	12	mt	29	15.6	2.3	poteca	0		2Ll si metamorfi, 1Rm, canta Ll				ATENTIE!!! Datele de gps sunt gresite, apar cu o ora mai tarziu decat in realitate		innorat	portiunea de transect intre sosea si capcana 1 este inundata
2016.03.12	05:00:00	13	mt	29.9	16.1	2.5	poteca	0		2Ll si metamorfi, 1Rm, canta Ll				ATENTIE!!! Datele de gps sunt gresite, apar cu o ora mai tarziu decat in realitate		innorat	portiunea de transect intre sosea si capcana 1 este inundata
2016.03.12	05:00:00	14	mt	29.6	15.3	3	poteca	0		2Ll si metamorfi, 1Rm, canta Ll				ATENTIE!!! Datele de gps sunt gresite, apar cu o ora mai tarziu decat in realitate		innorat	portiunea de transect intre sosea si capcana 1 este inundata
2016.03.12	05:00:00	15	mt	31.1	15.5	2.7	ascuns in vegetatie	0		2Ll si metamorfi, 1Rm, canta Ll				ATENTIE!!! Datele de gps sunt gresite, apar cu o ora mai tarziu decat in realitate		innorat	portiunea de transect intre sosea si capcana 1 este inundata
2016.03.12	05:00:00	16	mt	27.5	14.9	2.3	ascuns in vegetatie	0		2Ll si metamorfi, 1Rm, canta Ll				ATENTIE!!! Datele de gps sunt gresite, apar cu o ora mai tarziu decat in realitate		innorat	portiunea de transect intre sosea si capcana 1 este inundata
2016.03.12	05:00:00	17	mt	29	15.2	2.5	ascuns in vegetatie	0		2Ll si metamorfi, 1Rm, canta Ll				ATENTIE!!! Datele de gps sunt gresite, apar cu o ora mai tarziu decat in realitate		innorat	portiunea de transect intre sosea si capcana 1 este inundata
2016.03.12	05:00:00	18	mt	29.3	16.1	3.1	ascuns in vegetatie	0		2Ll si metamorfi, 1Rm, canta Ll				ATENTIE!!! Datele de gps sunt gresite, apar cu o ora mai tarziu decat in realitate		innorat	portiunea de transect intre sosea si capcana 1 este inundata
2016.03.12	05:00:00	19	mt	29.2	14.5	2.4	ascuns in vegetatie	0		2Ll si metamorfi, 1Rm, canta Ll				ATENTIE!!! Datele de gps sunt gresite, apar cu o ora mai tarziu decat in realitate		innorat	portiunea de transect intre sosea si capcana 1 este inundata
2016.03.12	05:00:00	20	mt	26.5	15.5	1.9	ascuns in vegetatie	0		2Ll si metamorfi, 1Rm, canta Ll				ATENTIE!!! Datele de gps sunt gresite, apar cu o ora mai tarziu decat in realitate		innorat	portiunea de transect intre sosea si capcana 1 este inundata
2016.03.12	05:00:00	21	mt				ascuns in vegetatie	0		2Ll si metamorfi, 1Rm, canta Ll				ATENTIE!!! Datele de gps sunt gresite, apar cu o ora mai tarziu decat in realitate		innorat	portiunea de transect intre sosea si capcana 1 este inundata
2016.03.12	05:00:00	22	mt				ascuns in vegetatie	0		2Ll si metamorfi, 1Rm, canta Ll				ATENTIE!!! Datele de gps sunt gresite, apar cu o ora mai tarziu decat in realitate		innorat	portiunea de transect intre sosea si capcana 1 este inundata
2016.03.12	05:00:00	23	mt				ascuns in vegetatie	0		2Ll si metamorfi, 1Rm, canta Ll				ATENTIE!!! Datele de gps sunt gresite, apar cu o ora mai tarziu decat in realitate		innorat	portiunea de transect intre sosea si capcana 1 este inundata
2016.03.12	05:00:00	24	mt				ascuns in vegetatie	0		2Ll si metamorfi, 1Rm, canta Ll				ATENTIE!!! Datele de gps sunt gresite, apar cu o ora mai tarziu decat in realitate		innorat	portiunea de transect intre sosea si capcana 1 este inundata
2016.03.12	05:00:00	25	f	67.8	31.1	36.7	apa	0		2Ll si metamorfi, 1Rm, canta Ll				ATENTIE!!! Datele de gps sunt gresite, apar cu o ora mai tarziu decat in realitate		innorat	portiunea de transect intre sosea si capcana 1 este inundata
2016.03.12	05:00:00	26	f	67	31.9	43.1	apa	0		2Ll si metamorfi, 1Rm, canta Ll				ATENTIE!!! Datele de gps sunt gresite, apar cu o ora mai tarziu decat in realitate		innorat	portiunea de transect intre sosea si capcana 1 este inundata
2016.03.12	05:00:00	27	mt				ascuns in vegetatie	0		2Ll si metamorfi, 1Rm, canta Ll				ATENTIE!!! Datele de gps sunt gresite, apar cu o ora mai tarziu decat in realitate		innorat	portiunea de transect intre sosea si capcana 1 este inundata
2016.03.12	05:00:00	28	mt				ascuns in vegetatie	0		2Ll si metamorfi, 1Rm, canta Ll				ATENTIE!!! Datele de gps sunt gresite, apar cu o ora mai tarziu decat in realitate		innorat	portiunea de transect intre sosea si capcana 1 este inundata
2016.03.12	05:00:00	29	f	62.7	29.6	26.5	ascuns in vegetatie	0		2Ll si metamorfi, 1Rm, canta Ll				ATENTIE!!! Datele de gps sunt gresite, apar cu o ora mai tarziu decat in realitate		innorat	portiunea de transect intre sosea si capcana 1 este inundata
2016.03.12	05:00:00	30	mt				ascuns in vegetatie	0		2Ll si metamorfi, 1Rm, canta Ll				ATENTIE!!! Datele de gps sunt gresite, apar cu o ora mai tarziu decat in realitate		innorat	portiunea de transect intre sosea si capcana 1 este inundata
2016.03.12	05:00:00	31	mt				ascuns in vegetatie	0		2Ll si metamorfi, 1Rm, canta Ll				ATENTIE!!! Datele de gps sunt gresite, apar cu o ora mai tarziu decat in realitate		innorat	portiunea de transect intre sosea si capcana 1 este inundata
2016.03.12	05:00:00	32	mt				ascuns in vegetatie	0		2Ll si metamorfi, 1Rm, canta Ll				ATENTIE!!! Datele de gps sunt gresite, apar cu o ora mai tarziu decat in realitate		innorat	portiunea de transect intre sosea si capcana 1 este inundata
2016.03.12	05:00:00	33	mt				ascuns in vegetatie	0		2Ll si metamorfi, 1Rm, canta Ll				ATENTIE!!! Datele de gps sunt gresite, apar cu o ora mai tarziu decat in realitate		innorat	portiunea de transect intre sosea si capcana 1 este inundata
2016.03.12	05:00:00	37	mt				ascuns in vegetatie	0		2Ll si metamorfi, 1Rm, canta Ll				ATENTIE!!! Datele de gps sunt gresite, apar cu o ora mai tarziu decat in realitate		innorat	portiunea de transect intre sosea si capcana 1 este inundata
2016.03.13	17:00:00	1	mt	29.6	15.2	2.4	ascuns in vegetatie	0		metamorfi Ll, canta Ll						innorat	portiunea de transect intre sosea si capcana 1 este inundata
2016.03.13	17:00:00	2	mt	23.8	12.4	1.5	ascuns in vegetatie	0		metamorfi Ll, canta Ll						innorat	portiunea de transect intre sosea si capcana 1 este inundata
2016.03.13	17:00:00	3	mt	25.6	13.6	1.5	poteca	0		metamorfi Ll, canta Ll						innorat	portiunea de transect intre sosea si capcana 1 este inundata
2016.03.13	17:00:00	4	mt	27.2	14.1	1.9	ascuns in vegetatie	0		metamorfi Ll, canta Ll						innorat	portiunea de transect intre sosea si capcana 1 este inundata
2016.03.13	17:00:00	5	mt	26.1	13.2	1.4	ascuns in vegetatie	0		metamorfi Ll, canta Ll						innorat	portiunea de transect intre sosea si capcana 1 este inundata
2016.03.13	17:00:00	6	mt	27.7	13.9	1.8	ascuns in vegetatie	0		metamorfi Ll, canta Ll						innorat	portiunea de transect intre sosea si capcana 1 este inundata
2016.03.13	17:00:00	7	mt	24.6	13.1	1.2	ascuns in vegetatie	0		metamorfi Ll, canta Ll						innorat	portiunea de transect intre sosea si capcana 1 este inundata
2016.03.13	17:00:00	8	mt				ascuns in vegetatie	0		metamorfi Ll, canta Ll			pierdut			innorat	portiunea de transect intre sosea si capcana 1 este inundata
2016.03.13	17:00:00	9	mt	26.7	14.3	1.8	poteca	0		metamorfi Ll, canta Ll						innorat	portiunea de transect intre sosea si capcana 1 este inundata
2016.03.13	17:00:00	10	mt	26.7	13.6	1.9	poteca	0		metamorfi Ll, canta Ll						innorat	portiunea de transect intre sosea si capcana 1 este inundata
2016.03.13	17:00:00	11	mt	28.2	14.6	2.1	ascuns in vegetatie	0		metamorfi Ll, canta Ll						innorat	portiunea de transect intre sosea si capcana 1 este inundata
2016.03.13	17:00:00	12	mt				ascuns in vegetatie	0		metamorfi Ll, canta Ll			pierdut			innorat	portiunea de transect intre sosea si capcana 1 este inundata
2016.03.13	17:00:00	13	mt	24.6	11.6	1.3	ascuns in vegetatie	0		metamorfi Ll, canta Ll						innorat	portiunea de transect intre sosea si capcana 1 este inundata
2016.03.13	17:00:00	14	mt	31.1	16.4	3.1	ascuns in vegetatie	0		metamorfi Ll, canta Ll						innorat	portiunea de transect intre sosea si capcana 1 este inundata
2016.03.13	17:00:00	15	mt	26.9	13	1.9	ascuns in vegetatie	0		metamorfi Ll, canta Ll						innorat	portiunea de transect intre sosea si capcana 1 este inundata
2016.03.13	17:00:00	16	mt	28.6	15.4	2.3	ascuns in vegetatie	0		metamorfi Ll, canta Ll						innorat	portiunea de transect intre sosea si capcana 1 este inundata
2016.03.13	17:00:00	17	mt	26.8	13.3	2.1	ascuns in vegetatie	0		metamorfi Ll, canta Ll						innorat	portiunea de transect intre sosea si capcana 1 este inundata
2016.03.13	17:00:00	18	mt	25.5	11.3	1.9	ascuns in vegetatie	0		metamorfi Ll, canta Ll						innorat	portiunea de transect intre sosea si capcana 1 este inundata
2016.03.13	17:00:00	19	mt	25.2	13.4	1.7	ascuns in vegetatie	0		metamorfi Ll, canta Ll						innorat	portiunea de transect intre sosea si capcana 1 este inundata
2016.03.13	17:00:00	20	mt	29.9	14.1	2.4	ascuns in vegetatie	0		metamorfi Ll, canta Ll						innorat	portiunea de transect intre sosea si capcana 1 este inundata
2016.03.13	17:00:00	21	mt	27	11.3	2	ascuns in vegetatie	0		metamorfi Ll, canta Ll						innorat	portiunea de transect intre sosea si capcana 1 este inundata
2016.03.13	17:00:00	22	mt	27.1	13.3	2.1	ascuns in vegetatie	0		metamorfi Ll, canta Ll						innorat	portiunea de transect intre sosea si capcana 1 este inundata
2016.03.13	17:00:00	23	mt				ascuns in vegetatie	0		metamorfi Ll, canta Ll						innorat	portiunea de transect intre sosea si capcana 1 este inundata
2016.03.13	17:00:00	24	mt				ascuns in vegetatie	0		metamorfi Ll, canta Ll						innorat	portiunea de transect intre sosea si capcana 1 este inundata
2016.03.13	17:00:00	25	mt				ascuns in vegetatie	0		metamorfi Ll, canta Ll						innorat	portiunea de transect intre sosea si capcana 1 este inundata
2016.03.13	17:00:00	26	mt				ascuns in vegetatie	0		metamorfi Ll, canta Ll						innorat	portiunea de transect intre sosea si capcana 1 este inundata
2016.03.13	17:00:00	27	mt				ascuns in vegetatie	0		metamorfi Ll, canta Ll						innorat	portiunea de transect intre sosea si capcana 1 este inundata
2016.03.13	17:00:00	28	mt				ascuns in vegetatie	0		metamorfi Ll, canta Ll						innorat	portiunea de transect intre sosea si capcana 1 este inundata
2016.03.13	17:00:00	29	mt				ascuns in vegetatie	0		metamorfi Ll, canta Ll						innorat	portiunea de transect intre sosea si capcana 1 este inundata
2016.03.13	17:00:00	30	mt				ascuns in vegetatie	0		metamorfi Ll, canta Ll						innorat	portiunea de transect intre sosea si capcana 1 este inundata
2016.03.13	17:00:00	31	mt				ascuns in vegetatie	0		metamorfi Ll, canta Ll						innorat	portiunea de transect intre sosea si capcana 1 este inundata
2016.03.13	17:00:00	32	mt				ascuns in vegetatie	0		metamorfi Ll, canta Ll						innorat	portiunea de transect intre sosea si capcana 1 este inundata
2016.03.13	17:00:00	33	mt				ascuns in vegetatie	0		metamorfi Ll, canta Ll						innorat	portiunea de transect intre sosea si capcana 1 este inundata
2016.03.13	17:00:00	34	mt				ascuns in vegetatie	0		metamorfi Ll, canta Ll						innorat	portiunea de transect intre sosea si capcana 1 este inundata
2016.03.13	17:00:00	35	mt				ascuns in vegetatie	0		metamorfi Ll, canta Ll						innorat	portiunea de transect intre sosea si capcana 1 este inundata
2016.03.13	17:00:00	36	mt				ascuns in vegetatie	0		metamorfi Ll, canta Ll						innorat	portiunea de transect intre sosea si capcana 1 este inundata
2016.03.13	17:00:00	37	mt				ascuns in vegetatie	0		metamorfi Ll, canta Ll						innorat	portiunea de transect intre sosea si capcana 1 este inundata
2016.03.13	17:00:00	38	mt				ascuns in vegetatie	0		metamorfi Ll, canta Ll						innorat	portiunea de transect intre sosea si capcana 1 este inundata
2016.03.13	17:00:00	39	mt				ascuns in vegetatie	0		metamorfi Ll, canta Ll						innorat	portiunea de transect intre sosea si capcana 1 este inundata
2016.03.13	17:00:00	40	mt				ascuns in vegetatie	0		metamorfi Ll, canta Ll						innorat	portiunea de transect intre sosea si capcana 1 este inundata
2016.03.13	17:00:00	41	mt				ascuns in vegetatie	0		metamorfi Ll, canta Ll						innorat	portiunea de transect intre sosea si capcana 1 este inundata
2016.03.13	17:00:00	42	mt				ascuns in vegetatie	0		metamorfi Ll, canta Ll						innorat	portiunea de transect intre sosea si capcana 1 este inundata
2016.03.13	17:00:00	43	mt				ascuns in vegetatie	0		metamorfi Ll, canta Ll						innorat	portiunea de transect intre sosea si capcana 1 este inundata
2016.03.13	17:00:00	44	mt				ascuns in vegetatie	0		metamorfi Ll, canta Ll						innorat	portiunea de transect intre sosea si capcana 1 este inundata
2016.03.13	17:00:00	45	mt				ascuns in vegetatie	0		metamorfi Ll, canta Ll						innorat	portiunea de transect intre sosea si capcana 1 este inundata
2016.03.13	17:00:00	46	mt				ascuns in vegetatie	0		metamorfi Ll, canta Ll						innorat	portiunea de transect intre sosea si capcana 1 este inundata
2016.03.13	17:00:00	47	mt				ascuns in vegetatie	0		metamorfi Ll, canta Ll						innorat	portiunea de transect intre sosea si capcana 1 este inundata
2016.03.13	17:00:00	48	mt				ascuns in vegetatie	0		metamorfi Ll, canta Ll						innorat	portiunea de transect intre sosea si capcana 1 este inundata
2016.03.13	17:00:00	49	mt				ascuns in vegetatie	0		metamorfi Ll, canta Ll						innorat	portiunea de transect intre sosea si capcana 1 este inundata
2016.03.13	17:00:00	50	mt				ascuns in vegetatie	0		metamorfi Ll, canta Ll						innorat	portiunea de transect intre sosea si capcana 1 este inundata
2016.03.13	17:00:00	51	mt				ascuns in vegetatie	0		metamorfi Ll, canta Ll						innorat	portiunea de transect intre sosea si capcana 1 este inundata
2016.03.13	17:00:00	52	mt				ascuns in vegetatie	0		metamorfi Ll, canta Ll						innorat	portiunea de transect intre sosea si capcana 1 este inundata
2016.03.13	17:00:00	53	mt				ascuns in vegetatie	0		metamorfi Ll, canta Ll						innorat	portiunea de transect intre sosea si capcana 1 este inundata
2016.03.13	17:00:00	54	mt				ascuns in vegetatie	0		metamorfi Ll, canta Ll						innorat	portiunea de transect intre sosea si capcana 1 este inundata
2016.03.13	17:00:00	55	mt				ascuns in vegetatie	0		metamorfi Ll, canta Ll						innorat	portiunea de transect intre sosea si capcana 1 este inundata
2016.03.13	17:00:00	56	mt				ascuns in vegetatie	0		metamorfi Ll, canta Ll						innorat	portiunea de transect intre sosea si capcana 1 este inundata
2016.03.13	17:00:00	57	mt				ascuns in vegetatie	0		metamorfi Ll, canta Ll						innorat	portiunea de transect intre sosea si capcana 1 este inundata
2016.03.13	17:00:00	58	mt				ascuns in vegetatie	0		metamorfi Ll, canta Ll						innorat	portiunea de transect intre sosea si capcana 1 este inundata
2016.03.13	17:00:00	59	mt				ascuns in vegetatie	0		metamorfi Ll, canta Ll						innorat	portiunea de transect intre sosea si capcana 1 este inundata
2016.03.13	17:00:00	60	mt				ascuns in vegetatie	0		metamorfi Ll, canta Ll						innorat	portiunea de transect intre sosea si capcana 1 este inundata
2016.03.13	17:00:00	61	mt				ascuns in vegetatie	0		metamorfi Ll, canta Ll						innorat	portiunea de transect intre sosea si capcana 1 este inundata
2016.03.13	17:00:00	62	mt				ascuns in vegetatie	0		metamorfi Ll, canta Ll						innorat	portiunea de transect intre sosea si capcana 1 este inundata
2016.03.13	17:00:00	63	mt				ascuns in vegetatie	0		metamorfi Ll, canta Ll						innorat	portiunea de transect intre sosea si capcana 1 este inundata
2016.03.13	17:00:00	64	mt				ascuns in vegetatie	0		metamorfi Ll, canta Ll						innorat	portiunea de transect intre sosea si capcana 1 este inundata
2016.03.13	17:00:00	65	mt				ascuns in vegetatie	0		metamorfi Ll, canta Ll						innorat	portiunea de transect intre sosea si capcana 1 este inundata
2016.03.13	17:00:00	66	mt				ascuns in vegetatie	0		metamorfi Ll, canta Ll						innorat	portiunea de transect intre sosea si capcana 1 este inundata
2016.03.13	17:00:00	67	mt				ascuns in vegetatie	0		metamorfi Ll, canta Ll						innorat	portiunea de transect intre sosea si capcana 1 este inundata
2016.03.13	17:00:00	68	mt				ascuns in vegetatie	0		metamorfi Ll, canta Ll						innorat	portiunea de transect intre sosea si capcana 1 este inundata
2016.03.13	17:00:00	69	mt				ascuns in vegetatie	0		metamorfi Ll, canta Ll						innorat	portiunea de transect intre sosea si capcana 1 este inundata
2016.03.13	17:00:00	70	mt				ascuns in vegetatie	0		metamorfi Ll, canta Ll						innorat	portiunea de transect intre sosea si capcana 1 este inundata
2016.03.13	17:00:00	71	mt				ascuns in vegetatie	0		metamorfi Ll, canta Ll						innorat	portiunea de transect intre sosea si capcana 1 este inundata
2016.03.13	17:00:00	72	mt				ascuns in vegetatie	0		metamorfi Ll, canta Ll						innorat	portiunea de transect intre sosea si capcana 1 este inundata
2016.03.13	17:00:00	73	mt				ascuns in vegetatie	0		metamorfi Ll, canta Ll						innorat	portiunea de transect intre sosea si capcana 1 este inundata
2016.03.13	17:00:00	74	mt				ascuns in vegetatie	0		metamorfi Ll, canta Ll						innorat	portiunea de transect intre sosea si capcana 1 este inundata
2016.03.13	17:00:00	75	mt				ascuns in vegetatie	0		metamorfi Ll, canta Ll						innorat	portiunea de transect intre sosea si capcana 1 este inundata
2016.03.13	17:00:00	76	mt				ascuns in vegetatie	0		metamorfi Ll, canta Ll						innorat	portiunea de transect intre sosea si capcana 1 este inundata
2016.03.13	17:00:00	77	mt				ascuns in vegetatie	0		metamorfi Ll, canta Ll						innorat	portiunea de transect intre sosea si capcana 1 este inundata
2016.03.13	17:00:00	78	mt				ascuns in vegetatie	0		metamorfi Ll, canta Ll						innorat	portiunea de transect intre sosea si capcana 1 este inundata
2016.03.13	17:00:00	79	mt				ascuns in vegetatie	0		metamorfi Ll, canta Ll						innorat	portiunea de transect intre sosea si capcana 1 este inundata
2016.03.13	17:00:00	80	mt				ascuns in vegetatie	0		metamorfi Ll, canta Ll						innorat	portiunea de transect intre sosea si capcana 1 este inundata
2016.03.13	17:00:00	81	mt				ascuns in vegetatie	0		metamorfi Ll, canta Ll						innorat	portiunea de transect intre sosea si capcana 1 este inundata
2016.03.13	17:00:00	82	mt				ascuns in vegetatie	0		metamorfi Ll, canta Ll						innorat	portiunea de transect intre sosea si capcana 1 este inundata
2016.03.13	17:00:00	83	mt				ascuns in vegetatie	0		metamorfi Ll, canta Ll						innorat	portiunea de transect intre sosea si capcana 1 este inundata
2016.03.13	17:00:00	84	mt				ascuns in vegetatie	0		metamorfi Ll, canta Ll						innorat	portiunea de transect intre sosea si capcana 1 este inundata
2016.03.13	17:00:00	85	mt				ascuns in vegetatie	0		metamorfi Ll, canta Ll						innorat	portiunea de transect intre sosea si capcana 1 este inundata
2016.03.13	17:00:00	86	mt				ascuns in vegetatie	0		metamorfi Ll, canta Ll						innorat	portiunea de transect intre sosea si capcana 1 este inundata
2016.03.13	17:00:00	87	mt				ascuns in vegetatie	0		metamorfi Ll, canta Ll						innorat	portiunea de transect intre sosea si capcana 1 este inundata
2016.03.13	17:00:00	88	mt				ascuns in vegetatie	0		metamorfi Ll, canta Ll						innorat	portiunea de transect intre sosea si capcana 1 este inundata
2016.03.13	17:00:00	89	mt				ascuns in vegetatie	0		metamorfi Ll, canta Ll						innorat	portiunea de transect intre sosea si capcana 1 este inundata
2016.03.13	17:00:00	90	mt				ascuns in vegetatie	0		metamorfi Ll, canta Ll						innorat	portiunea de transect intre sosea si capcana 1 este inundata
2016.03.13	17:00:00	91	mt				ascuns in vegetatie	0		metamorfi Ll, canta Ll						innorat	portiunea de transect intre sosea si capcana 1 este inundata
2016.03.13	17:00:00	92	mt				ascuns in vegetatie	0		metamorfi Ll, canta Ll						innorat	portiunea de transect intre sosea si capcana 1 este inundata
2016.03.13	17:00:00	93	mt				ascuns in vegetatie	0		metamorfi Ll, canta Ll						innorat	portiunea de transect intre sosea si capcana 1 este inundata
2016.03.13	17:00:00	94	mt				ascuns in vegetatie	0		metamorfi Ll, canta Ll						innorat	portiunea de transect intre sosea si capcana 1 este inundata
2016.03.13	17:00:00	95	mt				ascuns in vegetatie	0		metamorfi Ll, canta Ll						innorat	portiunea de transect intre sosea si capcana 1 este inundata
2016.03.13	17:00:00	96	mt				ascuns in vegetatie	0		metamorfi Ll, canta Ll						innorat	portiunea de transect intre sosea si capcana 1 este inundata
2016.03.13	17:00:00	97	mt				ascuns in vegetatie	0		metamorfi Ll, canta Ll						innorat	portiunea de transect intre sosea si capcana 1 este inundata
2016.03.13	17:00:00	98	mt				ascuns in vegetatie	0		metamorfi Ll, canta Ll						innorat	portiunea de transect intre sosea si capcana 1 este inundata
2016.03.13	17:00:00	99	mt				ascuns in vegetatie	0		metamorfi Ll, canta Ll						innorat	portiunea de transect intre sosea si capcana 1 este inundata
2016.03.13	17:00:00	100	mt				ascuns in vegetatie	0		metamorfi Ll, canta Ll						innorat	portiunea de transect intre sosea si capcana 1 este inundata
2016.03.13	17:00:00	101	mt				ascuns in vegetatie	0		metamorfi Ll, canta Ll						innorat	portiunea de transect intre sosea si capcana 1 este inundata
2016.03.13	17:00:00	102	mt				ascuns in vegetatie	0		metamorfi Ll, canta Ll						innorat	portiunea de transect intre sosea si capcana 1 este inundata
2016.03.13	17:00:00	103	mt				ascuns in vegetatie	0		metamorfi Ll, canta Ll						innorat	portiunea de transect intre sosea si capcana 1 este inundata
2016.03.13	17:00:00	104	mt				ascuns in vegetatie	0		metamorfi Ll, canta Ll						innorat	portiunea de transect intre sosea si capcana 1 este inundata
2016.03.13	17:00:00	105	mt				ascuns in vegetatie	0		metamorfi Ll, canta Ll						innorat	portiunea de transect intre sosea si capcana 1 este inundata
2016.03.13	17:00:00	106	mt				poteca	0		metamorfi Ll, canta Ll						innorat	portiunea de transect intre sosea si capcana 1 este inundata
2016.03.13	17:00:00	107	mt				poteca	0		metamorfi Ll, canta Ll						innorat	portiunea de transect intre sosea si capcana 1 este inundata
2016.03.13	17:00:00	108	mt				poteca	0		metamorfi Ll, canta Ll						innorat	portiunea de transect intre sosea si capcana 1 este inundata
2016.03.13	17:00:00	109	mt				poteca	0		metamorfi Ll, canta Ll						innorat	portiunea de transect intre sosea si capcana 1 este inundata
2016.03.13	17:00:00	110	mt				poteca	0		metamorfi Ll, canta Ll						innorat	portiunea de transect intre sosea si capcana 1 este inundata
2016.03.13	17:00:00	111	mt				poteca	0		metamorfi Ll, canta Ll						innorat	portiunea de transect intre sosea si capcana 1 este inundata
2016.03.13	17:00:00	112	mt				poteca	0		metamorfi Ll, canta Ll						innorat	portiunea de transect intre sosea si capcana 1 este inundata
2016.03.13	17:00:00	113	mt				poteca	0		metamorfi Ll, canta Ll						innorat	portiunea de transect intre sosea si capcana 1 este inundata
2016.03.13	17:00:00	114	mt				poteca	0		metamorfi Ll, canta Ll						innorat	portiunea de transect intre sosea si capcana 1 este inundata
2016.03.13	17:00:00	115	mt				poteca	0		metamorfi Ll, canta Ll						innorat	portiunea de transect intre sosea si capcana 1 este inundata
2016.03.13	17:00:00	116	mt				poteca	0		metamorfi Ll, canta Ll						innorat	portiunea de transect intre sosea si capcana 1 este inundata
2016.03.14	10:00:00	1	mt	26.8	13.8	1.8		0.5	a plouat noaptea (4-5)	metamorfi Ll						innorat	portiunea de transect intre sosea si capcana 1 este inundata
2016.03.14	10:00:00	2	mt	28.5	14.7	2.2		0.5	a plouat noaptea (4-5)	metamorfi Ll						innorat	portiunea de transect intre sosea si capcana 1 este inundata
2016.03.14	10:00:00	3	mt	29.8	16.6	2.4		0.5	a plouat noaptea (4-5)	metamorfi Ll						innorat	portiunea de transect intre sosea si capcana 1 este inundata
2016.03.14	10:00:00	4	mt					0.5	a plouat noaptea (4-5)	metamorfi Ll						innorat	portiunea de transect intre sosea si capcana 1 este inundata
2016.03.14	10:00:00	5	mt	29.4	15.2	2.2		0.5	a plouat noaptea (4-5)	metamorfi Ll						innorat	portiunea de transect intre sosea si capcana 1 este inundata
2016.03.14	10:00:00	6	mt	26.8	14	1.8		0.5	a plouat noaptea (4-5)	metamorfi Ll						innorat	portiunea de transect intre sosea si capcana 1 este inundata
2016.03.14	10:00:00	7	mt	27.8	14.9	2.1		0.5	a plouat noaptea (4-5)	metamorfi Ll						innorat	portiunea de transect intre sosea si capcana 1 este inundata
2016.03.14	10:00:00	8	mt	29.5	15.2	2.1		0.5	a plouat noaptea (4-5)	metamorfi Ll						innorat	portiunea de transect intre sosea si capcana 1 este inundata
2016.03.14	10:00:00	9	mt	33.1	17.4	3.3		0.5	a plouat noaptea (4-5)	metamorfi Ll						innorat	portiunea de transect intre sosea si capcana 1 este inundata
2016.03.14	10:00:00	10	mt	27	14.3	1.9		0.5	a plouat noaptea (4-5)	metamorfi Ll						innorat	portiunea de transect intre sosea si capcana 1 este inundata
2016.03.14	10:00:00	11	mt	30.1	16.2	2.4		0.5	a plouat noaptea (4-5)	metamorfi Ll						innorat	portiunea de transect intre sosea si capcana 1 este inundata
2016.03.14	10:00:00	12	mt	25.3	13.4	1.7		0.5	a plouat noaptea (4-5)	metamorfi Ll						innorat	portiunea de transect intre sosea si capcana 1 este inundata
2016.03.14	10:00:00	13	mt					0.5	a plouat noaptea (4-5)	metamorfi Ll						innorat	portiunea de transect intre sosea si capcana 1 este inundata
2016.03.14	10:00:00	14	mt					0.5	a plouat noaptea (4-5)	metamorfi Ll						innorat	portiunea de transect intre sosea si capcana 1 este inundata
2016.03.14	10:00:00	15	mt					0.5	a plouat noaptea (4-5)	metamorfi Ll						innorat	portiunea de transect intre sosea si capcana 1 este inundata
2016.03.14	10:00:00	16	mt	29.7	14.6	2.1		0.5	a plouat noaptea (4-5)	metamorfi Ll						innorat	portiunea de transect intre sosea si capcana 1 este inundata
2016.03.14	10:00:00	17	mt	29.6	15.5	2.3		0.5	a plouat noaptea (4-5)	metamorfi Ll						innorat	portiunea de transect intre sosea si capcana 1 este inundata
2016.03.14	10:00:00	18	mt	29.3	15.4	2.1		0.5	a plouat noaptea (4-5)	metamorfi Ll						innorat	portiunea de transect intre sosea si capcana 1 este inundata
2016.03.14	10:00:00	19	mt					0.5	a plouat noaptea (4-5)	metamorfi Ll						innorat	portiunea de transect intre sosea si capcana 1 este inundata
2016.03.14	10:00:00	20	mt					0.5	a plouat noaptea (4-5)	metamorfi Ll						innorat	portiunea de transect intre sosea si capcana 1 este inundata
2016.03.14	10:00:00	21	mt					0.5	a plouat noaptea (4-5)	metamorfi Ll						innorat	portiunea de transect intre sosea si capcana 1 este inundata
2016.03.14	10:00:00	22	mt	27.3	14.1	1.8		0.5	a plouat noaptea (4-5)	metamorfi Ll						innorat	portiunea de transect intre sosea si capcana 1 este inundata
2016.03.14	10:00:00	23	mt	28.1	14.7	1.9		0.5	a plouat noaptea (4-5)	metamorfi Ll						innorat	portiunea de transect intre sosea si capcana 1 este inundata
2016.03.14	10:00:00	24	mt	27.7	13.6	1.7		0.5	a plouat noaptea (4-5)	metamorfi Ll						innorat	portiunea de transect intre sosea si capcana 1 este inundata
2016.03.14	10:00:00	25	mt	28.9	15.1	2.2		0.5	a plouat noaptea (4-5)	metamorfi Ll						innorat	portiunea de transect intre sosea si capcana 1 este inundata
2016.03.14	10:00:00	26	mt	30.6	15.8	2.6		0.5	a plouat noaptea (4-5)	metamorfi Ll						innorat	portiunea de transect intre sosea si capcana 1 este inundata
2016.03.14	10:00:00	27	mt	28.7	14.8	1.9		0.5	a plouat noaptea (4-5)	metamorfi Ll						innorat	portiunea de transect intre sosea si capcana 1 este inundata
2016.03.14	10:00:00	28	mt					0.5	a plouat noaptea (4-5)	metamorfi Ll						innorat	portiunea de transect intre sosea si capcana 1 este inundata
2016.03.14	10:00:00	29	mt					0.5	a plouat noaptea (4-5)	metamorfi Ll						innorat	portiunea de transect intre sosea si capcana 1 este inundata
2016.03.14	10:00:00	30	mt					0.5	a plouat noaptea (4-5)	metamorfi Ll						innorat	portiunea de transect intre sosea si capcana 1 este inundata
2016.03.14	10:00:00	31	mt					0.5	a plouat noaptea (4-5)	metamorfi Ll						innorat	portiunea de transect intre sosea si capcana 1 este inundata
2016.03.14	10:00:00	32	mt					0.5	a plouat noaptea (4-5)	metamorfi Ll						innorat	portiunea de transect intre sosea si capcana 1 este inundata
2016.03.14	10:00:00	33	mt					0.5	a plouat noaptea (4-5)	metamorfi Ll						innorat	portiunea de transect intre sosea si capcana 1 este inundata
2016.03.14	10:00:00	34	mt					0.5	a plouat noaptea (4-5)	metamorfi Ll						innorat	portiunea de transect intre sosea si capcana 1 este inundata
2016.03.14	10:00:00	35	mt					0.5	a plouat noaptea (4-5)	metamorfi Ll						innorat	portiunea de transect intre sosea si capcana 1 este inundata
2016.03.14	10:00:00	36	mt					0.5	a plouat noaptea (4-5)	metamorfi Ll						innorat	portiunea de transect intre sosea si capcana 1 este inundata
2016.03.14	10:00:00	37	mt					0.5	a plouat noaptea (4-5)	metamorfi Ll						innorat	portiunea de transect intre sosea si capcana 1 este inundata
2016.03.14	10:00:00	38	mt					0.5	a plouat noaptea (4-5)	metamorfi Ll						innorat	portiunea de transect intre sosea si capcana 1 este inundata
2016.03.14	10:00:00	39	mt					0.5	a plouat noaptea (4-5)	metamorfi Ll						innorat	portiunea de transect intre sosea si capcana 1 este inundata
2016.03.14	10:00:00	40	mt					0.5	a plouat noaptea (4-5)	metamorfi Ll						innorat	portiunea de transect intre sosea si capcana 1 este inundata
2016.03.14	10:00:00	41	mt					0.5	a plouat noaptea (4-5)	metamorfi Ll						innorat	portiunea de transect intre sosea si capcana 1 este inundata
2016.03.14	10:00:00	42	mt					0.5	a plouat noaptea (4-5)	metamorfi Ll						innorat	portiunea de transect intre sosea si capcana 1 este inundata
2016.03.14	10:00:00	43	mt					0.5	a plouat noaptea (4-5)	metamorfi Ll						innorat	portiunea de transect intre sosea si capcana 1 este inundata
2016.03.14	10:00:00	44	mt					0.5	a plouat noaptea (4-5)	metamorfi Ll						innorat	portiunea de transect intre sosea si capcana 1 este inundata
2016.03.14	10:00:00	45	mt					0.5	a plouat noaptea (4-5)	metamorfi Ll						innorat	portiunea de transect intre sosea si capcana 1 este inundata
2016.03.14	10:00:00	46	mt					0.5	a plouat noaptea (4-5)	metamorfi Ll						innorat	portiunea de transect intre sosea si capcana 1 este inundata
2016.03.14	10:00:00	47	mt					0.5	a plouat noaptea (4-5)	metamorfi Ll						innorat	portiunea de transect intre sosea si capcana 1 este inundata
2016.03.14	10:00:00	48	mt					0.5	a plouat noaptea (4-5)	metamorfi Ll						innorat	portiunea de transect intre sosea si capcana 1 este inundata
2016.03.14	10:00:00	49	mt					0.5	a plouat noaptea (4-5)	metamorfi Ll						innorat	portiunea de transect intre sosea si capcana 1 este inundata
2016.03.14	10:00:00	50	mt					0.5	a plouat noaptea (4-5)	metamorfi Ll						innorat	portiunea de transect intre sosea si capcana 1 este inundata
2016.03.14	10:00:00	51	mt					0.5	a plouat noaptea (4-5)	metamorfi Ll						innorat	portiunea de transect intre sosea si capcana 1 este inundata
2016.03.14	10:00:00	52	mt					0.5	a plouat noaptea (4-5)	metamorfi Ll						innorat	portiunea de transect intre sosea si capcana 1 este inundata
2016.03.14	10:00:00	53	mt					0.5	a plouat noaptea (4-5)	metamorfi Ll						innorat	portiunea de transect intre sosea si capcana 1 este inundata
2016.03.14	10:00:00	54	mt					0.5	a plouat noaptea (4-5)	metamorfi Ll						innorat	portiunea de transect intre sosea si capcana 1 este inundata
2016.03.14	10:00:00	55	mt					0.5	a plouat noaptea (4-5)	metamorfi Ll						innorat	portiunea de transect intre sosea si capcana 1 este inundata
2016.03.14	10:00:00	56	mt					0.5	a plouat noaptea (4-5)	metamorfi Ll						innorat	portiunea de transect intre sosea si capcana 1 este inundata
2016.03.14	10:00:00	57	mt					0.5	a plouat noaptea (4-5)	metamorfi Ll						innorat	portiunea de transect intre sosea si capcana 1 este inundata
2016.03.14	10:00:00	58	mt					0.5	a plouat noaptea (4-5)	metamorfi Ll						innorat	portiunea de transect intre sosea si capcana 1 este inundata
2016.03.14	10:00:00	59	mt					0.5	a plouat noaptea (4-5)	metamorfi Ll						innorat	portiunea de transect intre sosea si capcana 1 este inundata
2016.03.14	10:00:00	60	mt					0.5	a plouat noaptea (4-5)	metamorfi Ll						innorat	portiunea de transect intre sosea si capcana 1 este inundata
2016.03.14	10:00:00	61	mt					0.5	a plouat noaptea (4-5)	metamorfi Ll						innorat	portiunea de transect intre sosea si capcana 1 este inundata
2016.03.14	10:00:00	62	mt					0.5	a plouat noaptea (4-5)	metamorfi Ll						innorat	portiunea de transect intre sosea si capcana 1 este inundata
2016.03.14	10:00:00	63	mt					0.5	a plouat noaptea (4-5)	metamorfi Ll						innorat	portiunea de transect intre sosea si capcana 1 este inundata
2016.03.14	10:00:00	64	mt					0.5	a plouat noaptea (4-5)	metamorfi Ll						innorat	portiunea de transect intre sosea si capcana 1 este inundata
2016.03.14	10:00:00	65	mt					0.5	a plouat noaptea (4-5)	metamorfi Ll						innorat	portiunea de transect intre sosea si capcana 1 este inundata
2016.03.14	10:00:00	66	mt					0.5	a plouat noaptea (4-5)	metamorfi Ll						innorat	portiunea de transect intre sosea si capcana 1 este inundata
2016.03.14	10:00:00	67	mt					0.5	a plouat noaptea (4-5)	metamorfi Ll						innorat	portiunea de transect intre sosea si capcana 1 este inundata
2016.03.14	10:00:00	68	mt					0.5	a plouat noaptea (4-5)	metamorfi Ll						innorat	portiunea de transect intre sosea si capcana 1 este inundata
2016.03.14	10:00:00	69	mt					0.5	a plouat noaptea (4-5)	metamorfi Ll						innorat	portiunea de transect intre sosea si capcana 1 este inundata
2016.03.14	10:00:00	70	mt					0.5	a plouat noaptea (4-5)	metamorfi Ll						innorat	portiunea de transect intre sosea si capcana 1 este inundata
2016.03.14	10:00:00	71	mt					0.5	a plouat noaptea (4-5)	metamorfi Ll						innorat	portiunea de transect intre sosea si capcana 1 este inundata
2016.03.14	10:00:00	72	mt					0.5	a plouat noaptea (4-5)	metamorfi Ll						innorat	portiunea de transect intre sosea si capcana 1 este inundata
2016.03.14	10:00:00	73	mt	33	16.6	3.2		0.5	a plouat noaptea (4-5)	metamorfi Ll			canibalism 74			innorat	portiunea de transect intre sosea si capcana 1 este inundata
2016.03.14	10:00:00	74	mt	26.2	13.9	1.8		0.5	a plouat noaptea (4-5)	metamorfi Ll						innorat	portiunea de transect intre sosea si capcana 1 este inundata
2016.03.14	10:00:00	75	mt					0.5	a plouat noaptea (4-5)	metamorfi Ll						innorat	portiunea de transect intre sosea si capcana 1 este inundata
2016.03.14	10:00:00	76	mt					0.5	a plouat noaptea (4-5)	metamorfi Ll						innorat	portiunea de transect intre sosea si capcana 1 este inundata
2016.03.14	10:00:00	77	mt					0.5	a plouat noaptea (4-5)	metamorfi Ll						innorat	portiunea de transect intre sosea si capcana 1 este inundata
2016.03.14	10:00:00	78	mt					0.5	a plouat noaptea (4-5)	metamorfi Ll						innorat	portiunea de transect intre sosea si capcana 1 este inundata
2016.03.14	10:00:00	79	mt					0.5	a plouat noaptea (4-5)	metamorfi Ll						innorat	portiunea de transect intre sosea si capcana 1 este inundata
2016.03.14	10:00:00	80	mt					0.5	a plouat noaptea (4-5)	metamorfi Ll						innorat	portiunea de transect intre sosea si capcana 1 este inundata
2016.03.14	10:00:00	81	mt					0.5	a plouat noaptea (4-5)	metamorfi Ll						innorat	portiunea de transect intre sosea si capcana 1 este inundata
2016.03.14	10:00:00	82	mt					0.5	a plouat noaptea (4-5)	metamorfi Ll						innorat	portiunea de transect intre sosea si capcana 1 este inundata
2016.03.14	10:00:00	83	mt					0.5	a plouat noaptea (4-5)	metamorfi Ll						innorat	portiunea de transect intre sosea si capcana 1 este inundata
2016.03.14	10:00:00	84	mt					0.5	a plouat noaptea (4-5)	metamorfi Ll						innorat	portiunea de transect intre sosea si capcana 1 este inundata
2016.03.14	10:00:00	85	mt					0.5	a plouat noaptea (4-5)	metamorfi Ll						innorat	portiunea de transect intre sosea si capcana 1 este inundata
2016.03.14	10:00:00	86	mt					0.5	a plouat noaptea (4-5)	metamorfi Ll						innorat	portiunea de transect intre sosea si capcana 1 este inundata
2016.03.14	10:00:00	87	mt					0.5	a plouat noaptea (4-5)	metamorfi Ll						innorat	portiunea de transect intre sosea si capcana 1 este inundata
2016.03.14	10:00:00	88	mt					0.5	a plouat noaptea (4-5)	metamorfi Ll						innorat	portiunea de transect intre sosea si capcana 1 este inundata
2016.03.14	10:00:00	89	mt					0.5	a plouat noaptea (4-5)	metamorfi Ll						innorat	portiunea de transect intre sosea si capcana 1 este inundata
2016.03.14	10:00:00	90	mt					0.5	a plouat noaptea (4-5)	metamorfi Ll						innorat	portiunea de transect intre sosea si capcana 1 este inundata
2016.03.14	10:00:00	91	mt					0.5	a plouat noaptea (4-5)	metamorfi Ll						innorat	portiunea de transect intre sosea si capcana 1 este inundata
2016.03.14	10:00:00	92	mt					0.5	a plouat noaptea (4-5)	metamorfi Ll						innorat	portiunea de transect intre sosea si capcana 1 este inundata
2016.03.14	10:00:00	93	mt					0.5	a plouat noaptea (4-5)	metamorfi Ll						innorat	portiunea de transect intre sosea si capcana 1 este inundata
2016.03.14	10:00:00	94	mt					0.5	a plouat noaptea (4-5)	metamorfi Ll						innorat	portiunea de transect intre sosea si capcana 1 este inundata
2016.03.14	10:00:00	95	mt					0.5	a plouat noaptea (4-5)	metamorfi Ll						innorat	portiunea de transect intre sosea si capcana 1 este inundata
2016.03.14	10:00:00	96	mt					0.5	a plouat noaptea (4-5)	metamorfi Ll						innorat	portiunea de transect intre sosea si capcana 1 este inundata
2016.03.14	10:00:00	97	mt					0.5	a plouat noaptea (4-5)	metamorfi Ll						innorat	portiunea de transect intre sosea si capcana 1 este inundata
2016.03.14	10:00:00	98	mt					0.5	a plouat noaptea (4-5)	metamorfi Ll						innorat	portiunea de transect intre sosea si capcana 1 este inundata
2016.03.14	10:00:00	99	mt					0.5	a plouat noaptea (4-5)	metamorfi Ll						innorat	portiunea de transect intre sosea si capcana 1 este inundata
2016.03.14	10:00:00	100	mt					0.5	a plouat noaptea (4-5)	metamorfi Ll						innorat	portiunea de transect intre sosea si capcana 1 este inundata
2016.03.14	10:00:00	101	mt					0.5	a plouat noaptea (4-5)	metamorfi Ll						innorat	portiunea de transect intre sosea si capcana 1 este inundata
2016.03.14	10:00:00	102	mt					0.5	a plouat noaptea (4-5)	metamorfi Ll						innorat	portiunea de transect intre sosea si capcana 1 este inundata
2016.03.14	10:00:00	103	mt					0.5	a plouat noaptea (4-5)	metamorfi Ll						innorat	portiunea de transect intre sosea si capcana 1 este inundata
2016.03.14	10:00:00	104	mt					0.5	a plouat noaptea (4-5)	metamorfi Ll						innorat	portiunea de transect intre sosea si capcana 1 este inundata
2016.03.14	10:00:00	105	mt					0.5	a plouat noaptea (4-5)	metamorfi Ll						innorat	portiunea de transect intre sosea si capcana 1 este inundata
2016.03.14	10:00:00	106	mt					0.5	a plouat noaptea (4-5)	metamorfi Ll						innorat	portiunea de transect intre sosea si capcana 1 este inundata
2016.03.14	10:00:00	107	mt					0.5	a plouat noaptea (4-5)	metamorfi Ll						innorat	portiunea de transect intre sosea si capcana 1 este inundata
2016.03.14	10:00:00	108	mt					0.5	a plouat noaptea (4-5)	metamorfi Ll						innorat	portiunea de transect intre sosea si capcana 1 este inundata
2016.03.14	10:00:00	109	mt					0.5	a plouat noaptea (4-5)	metamorfi Ll						innorat	portiunea de transect intre sosea si capcana 1 este inundata
2016.03.14	10:00:00	110	mt					0.5	a plouat noaptea (4-5)	metamorfi Ll						innorat	portiunea de transect intre sosea si capcana 1 este inundata
2016.03.14	10:00:00	111	mt					0.5	a plouat noaptea (4-5)	metamorfi Ll						innorat	portiunea de transect intre sosea si capcana 1 este inundata
2016.03.14	10:00:00	112	mt					0.5	a plouat noaptea (4-5)	metamorfi Ll						innorat	portiunea de transect intre sosea si capcana 1 este inundata
2016.03.14	10:00:00	113	mt					0.5	a plouat noaptea (4-5)	metamorfi Ll						innorat	portiunea de transect intre sosea si capcana 1 este inundata
2016.03.14	10:00:00	114	mt					0.5	a plouat noaptea (4-5)	metamorfi Ll						innorat	portiunea de transect intre sosea si capcana 1 este inundata
2016.03.14	10:00:00	115	mt					0.5	a plouat noaptea (4-5)	metamorfi Ll						innorat	portiunea de transect intre sosea si capcana 1 este inundata
2016.03.14	10:00:00	116	mt					0.5	a plouat noaptea (4-5)	metamorfi Ll						innorat	portiunea de transect intre sosea si capcana 1 este inundata
2016.03.14	10:00:00	117	mt					0.5	a plouat noaptea (4-5)	metamorfi Ll						innorat	portiunea de transect intre sosea si capcana 1 este inundata
2016.03.14	10:00:00	118	mt					0.5	a plouat noaptea (4-5)	metamorfi Ll						innorat	portiunea de transect intre sosea si capcana 1 este inundata
2016.03.14	10:00:00	119	mt					0.5	a plouat noaptea (4-5)	metamorfi Ll						innorat	portiunea de transect intre sosea si capcana 1 este inundata
2016.03.14	10:00:00	120	mt					0.5	a plouat noaptea (4-5)	metamorfi Ll						innorat	portiunea de transect intre sosea si capcana 1 este inundata
2016.03.14	10:00:00	121	mt					0.5	a plouat noaptea (4-5)	metamorfi Ll						innorat	portiunea de transect intre sosea si capcana 1 este inundata
2016.03.14	10:00:00	122	mt					0.5	a plouat noaptea (4-5)	metamorfi Ll						innorat	portiunea de transect intre sosea si capcana 1 este inundata
2016.03.14	10:00:00	123	mt					0.5	a plouat noaptea (4-5)	metamorfi Ll						innorat	portiunea de transect intre sosea si capcana 1 este inundata
2016.03.14	10:00:00	124	mt					0.5	a plouat noaptea (4-5)	metamorfi Ll						innorat	portiunea de transect intre sosea si capcana 1 este inundata
2016.03.14	10:00:00	125	mt					0.5	a plouat noaptea (4-5)	metamorfi Ll						innorat	portiunea de transect intre sosea si capcana 1 este inundata
2016.03.14	10:00:00	126	mt					0.5	a plouat noaptea (4-5)	metamorfi Ll						innorat	portiunea de transect intre sosea si capcana 1 este inundata
2016.03.14	10:00:00	127	mt					0.5	a plouat noaptea (4-5)	metamorfi Ll						innorat	portiunea de transect intre sosea si capcana 1 este inundata
2016.03.14	10:00:00	128	mt					0.5	a plouat noaptea (4-5)	metamorfi Ll						innorat	portiunea de transect intre sosea si capcana 1 este inundata
2016.03.14	10:00:00	129	mt					0.5	a plouat noaptea (4-5)	metamorfi Ll						innorat	portiunea de transect intre sosea si capcana 1 este inundata
2016.03.14	10:00:00	130	mt					0.5	a plouat noaptea (4-5)	metamorfi Ll						innorat	portiunea de transect intre sosea si capcana 1 este inundata
2016.03.14	10:00:00	131	mt					0.5	a plouat noaptea (4-5)	metamorfi Ll						innorat	portiunea de transect intre sosea si capcana 1 este inundata
2016.03.14	10:00:00	132	mt					0.5	a plouat noaptea (4-5)	metamorfi Ll						innorat	portiunea de transect intre sosea si capcana 1 este inundata
2016.03.14	10:00:00	133	mt					0.5	a plouat noaptea (4-5)	metamorfi Ll						innorat	portiunea de transect intre sosea si capcana 1 este inundata
2016.03.14	10:00:00	134	mt					0.5	a plouat noaptea (4-5)	metamorfi Ll						innorat	portiunea de transect intre sosea si capcana 1 este inundata
2016.03.14	10:00:00	135	mt					0.5	a plouat noaptea (4-5)	metamorfi Ll						innorat	portiunea de transect intre sosea si capcana 1 este inundata
2016.03.14	10:00:00	136	mt					0.5	a plouat noaptea (4-5)	metamorfi Ll						innorat	portiunea de transect intre sosea si capcana 1 este inundata
2016.03.14	10:00:00	137	mt					0.5	a plouat noaptea (4-5)	metamorfi Ll						innorat	portiunea de transect intre sosea si capcana 1 este inundata
2016.03.14	10:00:00	138	mt					0.5	a plouat noaptea (4-5)	metamorfi Ll						innorat	portiunea de transect intre sosea si capcana 1 este inundata
2016.03.14	10:00:00	139	mt					0.5	a plouat noaptea (4-5)	metamorfi Ll						innorat	portiunea de transect intre sosea si capcana 1 este inundata
2016.03.14	10:00:00	140	mt					0.5	a plouat noaptea (4-5)	metamorfi Ll						innorat	portiunea de transect intre sosea si capcana 1 este inundata
2016.03.14	10:00:00	141	mt					0.5	a plouat noaptea (4-5)	metamorfi Ll						innorat	portiunea de transect intre sosea si capcana 1 este inundata
2016.03.14	10:00:00	142	mt					0.5	a plouat noaptea (4-5)	metamorfi Ll						innorat	portiunea de transect intre sosea si capcana 1 este inundata
2016.03.14	10:00:00	143	mt					0.5	a plouat noaptea (4-5)	metamorfi Ll						innorat	portiunea de transect intre sosea si capcana 1 este inundata
2016.03.14	10:00:00	144	mt					0.5	a plouat noaptea (4-5)	metamorfi Ll						innorat	portiunea de transect intre sosea si capcana 1 este inundata
2016.03.14	10:00:00	145	mt					0.5	a plouat noaptea (4-5)	metamorfi Ll						innorat	portiunea de transect intre sosea si capcana 1 este inundata
2016.03.14	10:00:00	146	mt					0.5	a plouat noaptea (4-5)	metamorfi Ll						innorat	portiunea de transect intre sosea si capcana 1 este inundata
2016.03.14	10:00:00	147	mt					0.5	a plouat noaptea (4-5)	metamorfi Ll						innorat	portiunea de transect intre sosea si capcana 1 este inundata
2016.03.14	10:00:00	148	mt					0.5	a plouat noaptea (4-5)	metamorfi Ll						innorat	portiunea de transect intre sosea si capcana 1 este inundata
2016.03.14	10:00:00	149	mt					0.5	a plouat noaptea (4-5)	metamorfi Ll						innorat	portiunea de transect intre sosea si capcana 1 este inundata
2016.03.14	10:00:00	150	mt					0.5	a plouat noaptea (4-5)	metamorfi Ll						innorat	portiunea de transect intre sosea si capcana 1 este inundata
2016.03.14	10:00:00	151	mt					0.5	a plouat noaptea (4-5)	metamorfi Ll						innorat	portiunea de transect intre sosea si capcana 1 este inundata
2016.03.14	10:00:00	152	mt					0.5	a plouat noaptea (4-5)	metamorfi Ll						innorat	portiunea de transect intre sosea si capcana 1 este inundata
2016.03.14	10:00:00	153	mt					0.5	a plouat noaptea (4-5)	metamorfi Ll						innorat	portiunea de transect intre sosea si capcana 1 este inundata
2016.03.14	10:00:00	154	mt					0.5	a plouat noaptea (4-5)	metamorfi Ll						innorat	portiunea de transect intre sosea si capcana 1 este inundata
2016.03.14	10:00:00	155	mt					0.5	a plouat noaptea (4-5)	metamorfi Ll						innorat	portiunea de transect intre sosea si capcana 1 este inundata
2016.03.14	10:00:00	156	mt					0.5	a plouat noaptea (4-5)	metamorfi Ll						innorat	portiunea de transect intre sosea si capcana 1 este inundata
2016.03.14	10:00:00	157	mt					0.5	a plouat noaptea (4-5)	metamorfi Ll						innorat	portiunea de transect intre sosea si capcana 1 este inundata
2016.03.14	10:00:00	158	mt					0.5	a plouat noaptea (4-5)	metamorfi Ll						innorat	portiunea de transect intre sosea si capcana 1 este inundata
2016.03.14	10:00:00	159	mt					0.5	a plouat noaptea (4-5)	metamorfi Ll						innorat	portiunea de transect intre sosea si capcana 1 este inundata
2016.03.14	10:00:00	160	mt					0.5	a plouat noaptea (4-5)	metamorfi Ll						innorat	portiunea de transect intre sosea si capcana 1 este inundata
2016.03.14	10:00:00	161	mt					0.5	a plouat noaptea (4-5)	metamorfi Ll						innorat	portiunea de transect intre sosea si capcana 1 este inundata
2016.03.14	10:00:00	162	mt					0.5	a plouat noaptea (4-5)	metamorfi Ll						innorat	portiunea de transect intre sosea si capcana 1 este inundata
2016.03.14	10:00:00	163	mt					0.5	a plouat noaptea (4-5)	metamorfi Ll						innorat	portiunea de transect intre sosea si capcana 1 este inundata
2016.03.14	10:00:00	164	mt					0.5	a plouat noaptea (4-5)	metamorfi Ll						innorat	portiunea de transect intre sosea si capcana 1 este inundata
2016.03.14	10:00:00	165	mt					0.5	a plouat noaptea (4-5)	metamorfi Ll						innorat	portiunea de transect intre sosea si capcana 1 este inundata
2016.03.14	10:00:00	166	mt					0.5	a plouat noaptea (4-5)	metamorfi Ll						innorat	portiunea de transect intre sosea si capcana 1 este inundata
2016.03.14	10:00:00	167	mt					0.5	a plouat noaptea (4-5)	metamorfi Ll						innorat	portiunea de transect intre sosea si capcana 1 este inundata
2016.03.14	10:00:00	168	mt					0.5	a plouat noaptea (4-5)	metamorfi Ll						innorat	portiunea de transect intre sosea si capcana 1 este inundata
2016.03.14	10:00:00	169	mt					0.5	a plouat noaptea (4-5)	metamorfi Ll						innorat	portiunea de transect intre sosea si capcana 1 este inundata
2016.03.14	10:00:00	170	mt					0.5	a plouat noaptea (4-5)	metamorfi Ll						innorat	portiunea de transect intre sosea si capcana 1 este inundata
2016.03.14	10:00:00	171	mt					0.5	a plouat noaptea (4-5)	metamorfi Ll						innorat	portiunea de transect intre sosea si capcana 1 este inundata
2016.03.14	10:00:00	172	mt					0.5	a plouat noaptea (4-5)	metamorfi Ll						innorat	portiunea de transect intre sosea si capcana 1 este inundata
2016.03.14	10:00:00	173	mt					0.5	a plouat noaptea (4-5)	metamorfi Ll						innorat	portiunea de transect intre sosea si capcana 1 este inundata
2016.03.14	10:00:00	174	mt					0.5	a plouat noaptea (4-5)	metamorfi Ll						innorat	portiunea de transect intre sosea si capcana 1 este inundata
2016.03.14	10:00:00	175	mt					0.5	a plouat noaptea (4-5)	metamorfi Ll						innorat	portiunea de transect intre sosea si capcana 1 este inundata
2016.03.14	10:00:00	176	mt					0.5	a plouat noaptea (4-5)	metamorfi Ll						innorat	portiunea de transect intre sosea si capcana 1 este inundata
2016.03.14	10:00:00	177	mt					0.5	a plouat noaptea (4-5)	metamorfi Ll						innorat	portiunea de transect intre sosea si capcana 1 este inundata
2016.03.14	10:00:00	178	mt					0.5	a plouat noaptea (4-5)	metamorfi Ll						innorat	portiunea de transect intre sosea si capcana 1 este inundata
2016.03.14	10:00:00	179	mt					0.5	a plouat noaptea (4-5)	metamorfi Ll						innorat	portiunea de transect intre sosea si capcana 1 este inundata
2016.03.14	10:00:00	180	mt					0.5	a plouat noaptea (4-5)	metamorfi Ll						innorat	portiunea de transect intre sosea si capcana 1 este inundata
2016.03.14	10:00:00	181	mt					0.5	a plouat noaptea (4-5)	metamorfi Ll						innorat	portiunea de transect intre sosea si capcana 1 este inundata
2016.03.14	10:00:00	182	mt					0.5	a plouat noaptea (4-5)	metamorfi Ll						innorat	portiunea de transect intre sosea si capcana 1 este inundata
2016.03.14	10:00:00	183	mt					0.5	a plouat noaptea (4-5)	metamorfi Ll						innorat	portiunea de transect intre sosea si capcana 1 este inundata
2016.03.14	10:00:00	184	mt					0.5	a plouat noaptea (4-5)	metamorfi Ll						innorat	portiunea de transect intre sosea si capcana 1 este inundata
2016.03.14	10:00:00	185	mt					0.5	a plouat noaptea (4-5)	metamorfi Ll						innorat	portiunea de transect intre sosea si capcana 1 este inundata
2016.03.14	10:00:00	186	mt					0.5	a plouat noaptea (4-5)	metamorfi Ll						innorat	portiunea de transect intre sosea si capcana 1 este inundata
2016.03.14	10:00:00	187	mt					0.5	a plouat noaptea (4-5)	metamorfi Ll						innorat	portiunea de transect intre sosea si capcana 1 este inundata
2016.03.14	10:00:00	188	mt					0.5	a plouat noaptea (4-5)	metamorfi Ll						innorat	portiunea de transect intre sosea si capcana 1 este inundata
2016.03.14	10:00:00	189	mt					0.5	a plouat noaptea (4-5)	metamorfi Ll						innorat	portiunea de transect intre sosea si capcana 1 este inundata
2016.03.14	10:00:00	190	mt					0.5	a plouat noaptea (4-5)	metamorfi Ll						innorat	portiunea de transect intre sosea si capcana 1 este inundata
2016.03.14	10:00:00	191	mt					0.5	a plouat noaptea (4-5)	metamorfi Ll						innorat	portiunea de transect intre sosea si capcana 1 este inundata
2016.03.14	10:00:00	192	mt					0.5	a plouat noaptea (4-5)	metamorfi Ll						innorat	portiunea de transect intre sosea si capcana 1 este inundata
2016.03.14	10:00:00	193	mt					0.5	a plouat noaptea (4-5)	metamorfi Ll						innorat	portiunea de transect intre sosea si capcana 1 este inundata
2016.03.14	10:00:00	194	mt					0.5	a plouat noaptea (4-5)	metamorfi Ll						innorat	portiunea de transect intre sosea si capcana 1 este inundata
2016.03.14	10:00:00	195	mt					0.5	a plouat noaptea (4-5)	metamorfi Ll						innorat	portiunea de transect intre sosea si capcana 1 este inundata
2016.03.14	10:00:00	196	mt					0.5	a plouat noaptea (4-5)	metamorfi Ll						innorat	portiunea de transect intre sosea si capcana 1 este inundata
2016.03.14	10:00:00	197	mt					0.5	a plouat noaptea (4-5)	metamorfi Ll						innorat	portiunea de transect intre sosea si capcana 1 este inundata
2016.03.14	10:00:00	198	mt					0.5	a plouat noaptea (4-5)	metamorfi Ll						innorat	portiunea de transect intre sosea si capcana 1 este inundata
2016.03.14	10:00:00	199	mt					0.5	a plouat noaptea (4-5)	metamorfi Ll						innorat	portiunea de transect intre sosea si capcana 1 este inundata
2016.03.14	10:00:00	200	mt					0.5	a plouat noaptea (4-5)	metamorfi Ll						innorat	portiunea de transect intre sosea si capcana 1 este inundata
2016.03.14	10:00:00	201	mt					0.5	a plouat noaptea (4-5)	metamorfi Ll						innorat	portiunea de transect intre sosea si capcana 1 este inundata
2016.03.14	10:00:00	202	mt					0.5	a plouat noaptea (4-5)	metamorfi Ll						innorat	portiunea de transect intre sosea si capcana 1 este inundata
2016.03.14	10:00:00	203	mt					0.5	a plouat noaptea (4-5)	metamorfi Ll						innorat	portiunea de transect intre sosea si capcana 1 este inundata
2016.03.14	10:00:00	204	mt					0.5	a plouat noaptea (4-5)	metamorfi Ll						innorat	portiunea de transect intre sosea si capcana 1 este inundata
2016.03.14	10:00:00	205	mt					0.5	a plouat noaptea (4-5)	metamorfi Ll						innorat	portiunea de transect intre sosea si capcana 1 este inundata
2016.03.14	10:00:00	206	mt					0.5	a plouat noaptea (4-5)	metamorfi Ll						innorat	portiunea de transect intre sosea si capcana 1 este inundata
2016.03.14	10:00:00	207	mt					0.5	a plouat noaptea (4-5)	metamorfi Ll						innorat	portiunea de transect intre sosea si capcana 1 este inundata
2016.03.14	10:00:00	208	mt					0.5	a plouat noaptea (4-5)	metamorfi Ll						innorat	portiunea de transect intre sosea si capcana 1 este inundata
2016.03.14	10:00:00	209	mt					0.5	a plouat noaptea (4-5)	metamorfi Ll						innorat	portiunea de transect intre sosea si capcana 1 este inundata
2016.03.14	10:00:00	210	mt					0.5	a plouat noaptea (4-5)	metamorfi Ll						innorat	portiunea de transect intre sosea si capcana 1 este inundata
2016.03.14	10:00:00	211	mt					0.5	a plouat noaptea (4-5)	metamorfi Ll						innorat	portiunea de transect intre sosea si capcana 1 este inundata
2016.03.14	10:00:00	212	mt					0.5	a plouat noaptea (4-5)	metamorfi Ll						innorat	portiunea de transect intre sosea si capcana 1 este inundata
2016.03.14	10:00:00	213	mt					0.5	a plouat noaptea (4-5)	metamorfi Ll						innorat	portiunea de transect intre sosea si capcana 1 este inundata
2016.03.14	10:00:00	214	mt					0.5	a plouat noaptea (4-5)	metamorfi Ll						innorat	portiunea de transect intre sosea si capcana 1 este inundata
2016.03.14	10:00:00	215	mt					0.5	a plouat noaptea (4-5)	metamorfi Ll						innorat	portiunea de transect intre sosea si capcana 1 este inundata
2016.03.14	10:00:00	216	mt					0.5	a plouat noaptea (4-5)	metamorfi Ll						innorat	portiunea de transect intre sosea si capcana 1 este inundata
2016.03.14	10:00:00	217	mt					0.5	a plouat noaptea (4-5)	metamorfi Ll						innorat	portiunea de transect intre sosea si capcana 1 este inundata
2016.03.14	10:00:00	218	mt					0.5	a plouat noaptea (4-5)	metamorfi Ll						innorat	portiunea de transect intre sosea si capcana 1 este inundata
2016.03.14	10:00:00	219	mt					0.5	a plouat noaptea (4-5)	metamorfi Ll						innorat	portiunea de transect intre sosea si capcana 1 este inundata
2016.03.14	10:00:00	220	mt					0.5	a plouat noaptea (4-5)	metamorfi Ll						innorat	portiunea de transect intre sosea si capcana 1 este inundata
2016.03.14	10:00:00	221	mt					0.5	a plouat noaptea (4-5)	metamorfi Ll						innorat	portiunea de transect intre sosea si capcana 1 este inundata
2016.03.14	10:00:00	222	mt					0.5	a plouat noaptea (4-5)	metamorfi Ll						innorat	portiunea de transect intre sosea si capcana 1 este inundata
2016.03.14	10:00:00	223	mt					0.5	a plouat noaptea (4-5)	metamorfi Ll						innorat	portiunea de transect intre sosea si capcana 1 este inundata
2016.03.14	10:00:00	224	mt					0.5	a plouat noaptea (4-5)	metamorfi Ll						innorat	portiunea de transect intre sosea si capcana 1 este inundata
2016.03.14	10:00:00	225	mt					0.5	a plouat noaptea (4-5)	metamorfi Ll						innorat	portiunea de transect intre sosea si capcana 1 este inundata
2016.03.14	10:00:00	226	mt					0.5	a plouat noaptea (4-5)	metamorfi Ll						innorat	portiunea de transect intre sosea si capcana 1 este inundata
2016.03.14	10:00:00	227	mt					0.5	a plouat noaptea (4-5)	metamorfi Ll						innorat	portiunea de transect intre sosea si capcana 1 este inundata
2016.03.14	10:00:00	228	mt					0.5	a plouat noaptea (4-5)	metamorfi Ll						innorat	portiunea de transect intre sosea si capcana 1 este inundata
2016.03.14	10:00:00	229	mt					0.5	a plouat noaptea (4-5)	metamorfi Ll						innorat	portiunea de transect intre sosea si capcana 1 este inundata
2016.03.14	10:00:00	230	mt					0.5	a plouat noaptea (4-5)	metamorfi Ll						innorat	portiunea de transect intre sosea si capcana 1 este inundata
2016.03.14	10:00:00	231	mt					0.5	a plouat noaptea (4-5)	metamorfi Ll						innorat	portiunea de transect intre sosea si capcana 1 este inundata
2016.03.14	10:00:00	232	mt					0.5	a plouat noaptea (4-5)	metamorfi Ll						innorat	portiunea de transect intre sosea si capcana 1 este inundata
2016.03.14	10:00:00	233	mt					0.5	a plouat noaptea (4-5)	metamorfi Ll						innorat	portiunea de transect intre sosea si capcana 1 este inundata
2016.03.14	10:00:00	234	mt					0.5	a plouat noaptea (4-5)	metamorfi Ll						innorat	portiunea de transect intre sosea si capcana 1 este inundata
2016.03.14	10:00:00	235	mt					0.5	a plouat noaptea (4-5)	metamorfi Ll						innorat	portiunea de transect intre sosea si capcana 1 este inundata
2016.03.14	10:00:00	236	mt					0.5	a plouat noaptea (4-5)	metamorfi Ll						innorat	portiunea de transect intre sosea si capcana 1 este inundata
2016.03.14	10:00:00	237	mt					0.5	a plouat noaptea (4-5)	metamorfi Ll						innorat	portiunea de transect intre sosea si capcana 1 este inundata
2016.03.14	10:00:00	238	mt					0.5	a plouat noaptea (4-5)	metamorfi Ll						innorat	portiunea de transect intre sosea si capcana 1 este inundata
2016.03.14	10:00:00	239	mt					0.5	a plouat noaptea (4-5)	metamorfi Ll						innorat	portiunea de transect intre sosea si capcana 1 este inundata
2016.03.14	10:00:00	240	mt					0.5	a plouat noaptea (4-5)	metamorfi Ll						innorat	portiunea de transect intre sosea si capcana 1 este inundata
2016.03.14	10:00:00	241	mt					0.5	a plouat noaptea (4-5)	metamorfi Ll						innorat	portiunea de transect intre sosea si capcana 1 este inundata
2016.03.14	10:00:00	242	mt					0.5	a plouat noaptea (4-5)	metamorfi Ll						innorat	portiunea de transect intre sosea si capcana 1 este inundata
2016.03.14	10:00:00	243	mt					0.5	a plouat noaptea (4-5)	metamorfi Ll						innorat	portiunea de transect intre sosea si capcana 1 este inundata
2016.03.14	10:00:00	244	mt					0.5	a plouat noaptea (4-5)	metamorfi Ll						innorat	portiunea de transect intre sosea si capcana 1 este inundata
2016.03.14	10:00:00	245	mt					0.5	a plouat noaptea (4-5)	metamorfi Ll						innorat	portiunea de transect intre sosea si capcana 1 este inundata
2016.03.14	10:00:00	246	mt					0.5	a plouat noaptea (4-5)	metamorfi Ll						innorat	portiunea de transect intre sosea si capcana 1 este inundata
2016.03.14	10:00:00	247	mt					0.5	a plouat noaptea (4-5)	metamorfi Ll						innorat	portiunea de transect intre sosea si capcana 1 este inundata
2016.03.14	10:00:00	248	mt					0.5	a plouat noaptea (4-5)	metamorfi Ll						innorat	portiunea de transect intre sosea si capcana 1 este inundata
2016.03.14	10:00:00	249	mt					0.5	a plouat noaptea (4-5)	metamorfi Ll						innorat	portiunea de transect intre sosea si capcana 1 este inundata
2016.03.14	10:00:00	250	mt					0.5	a plouat noaptea (4-5)	metamorfi Ll						innorat	portiunea de transect intre sosea si capcana 1 este inundata
2016.03.14	10:00:00	251	mt					0.5	a plouat noaptea (4-5)	metamorfi Ll						innorat	portiunea de transect intre sosea si capcana 1 este inundata
2016.03.14	10:00:00	252	mt					0.5	a plouat noaptea (4-5)	metamorfi Ll						innorat	portiunea de transect intre sosea si capcana 1 este inundata
2016.03.14	10:00:00	253	mt					0.5	a plouat noaptea (4-5)	metamorfi Ll						innorat	portiunea de transect intre sosea si capcana 1 este inundata
2016.03.14	10:00:00	254	mt					0.5	a plouat noaptea (4-5)	metamorfi Ll						innorat	portiunea de transect intre sosea si capcana 1 este inundata
2016.03.14	10:00:00	255	mt					0.5	a plouat noaptea (4-5)	metamorfi Ll						innorat	portiunea de transect intre sosea si capcana 1 este inundata
2016.03.14	10:00:00	256	mt					0.5	a plouat noaptea (4-5)	metamorfi Ll						innorat	portiunea de transect intre sosea si capcana 1 este inundata
2016.03.14	10:00:00	257	mt					0.5	a plouat noaptea (4-5)	metamorfi Ll						innorat	portiunea de transect intre sosea si capcana 1 este inundata
2016.03.14	10:00:00	258	mt					0.5	a plouat noaptea (4-5)	metamorfi Ll						innorat	portiunea de transect intre sosea si capcana 1 este inundata
2016.03.14	10:00:00	259	mt					0.5	a plouat noaptea (4-5)	metamorfi Ll						innorat	portiunea de transect intre sosea si capcana 1 este inundata
2016.03.14	10:00:00	260	mt					0.5	a plouat noaptea (4-5)	metamorfi Ll						innorat	portiunea de transect intre sosea si capcana 1 este inundata
2016.03.14	10:00:00	261	mt					0.5	a plouat noaptea (4-5)	metamorfi Ll						innorat	portiunea de transect intre sosea si capcana 1 este inundata
2016.03.14	10:00:00	262	mt					0.5	a plouat noaptea (4-5)	metamorfi Ll						innorat	portiunea de transect intre sosea si capcana 1 este inundata
2016.03.14	10:00:00	263	mt					0.5	a plouat noaptea (4-5)	metamorfi Ll						innorat	portiunea de transect intre sosea si capcana 1 este inundata
2016.03.14	10:00:00	264	mt					0.5	a plouat noaptea (4-5)	metamorfi Ll						innorat	portiunea de transect intre sosea si capcana 1 este inundata
2016.03.14	10:00:00	265	mt					0.5	a plouat noaptea (4-5)	metamorfi Ll						innorat	portiunea de transect intre sosea si capcana 1 este inundata
2016.03.14	10:00:00	266	mt					0.5	a plouat noaptea (4-5)	metamorfi Ll						innorat	portiunea de transect intre sosea si capcana 1 este inundata
2016.03.14	10:00:00	267	mt					0.5	a plouat noaptea (4-5)	metamorfi Ll						innorat	portiunea de transect intre sosea si capcana 1 este inundata
2016.03.14	10:00:00	268	mt					0.5	a plouat noaptea (4-5)	metamorfi Ll						innorat	portiunea de transect intre sosea si capcana 1 este inundata
2016.03.14	10:00:00	269	mt					0.5	a plouat noaptea (4-5)	metamorfi Ll						innorat	portiunea de transect intre sosea si capcana 1 este inundata
2016.03.14	10:00:00	270	mt					0.5	a plouat noaptea (4-5)	metamorfi Ll						innorat	portiunea de transect intre sosea si capcana 1 este inundata
2016.03.14	10:00:00	271	mt					0.5	a plouat noaptea (4-5)	metamorfi Ll						innorat	portiunea de transect intre sosea si capcana 1 este inundata
2016.03.14	10:00:00	272	mt					0.5	a plouat noaptea (4-5)	metamorfi Ll						innorat	portiunea de transect intre sosea si capcana 1 este inundata
2016.03.14	10:00:00	273	mt					0.5	a plouat noaptea (4-5)	metamorfi Ll						innorat	portiunea de transect intre sosea si capcana 1 este inundata
2016.03.14	10:00:00	274	mt					0.5	a plouat noaptea (4-5)	metamorfi Ll						innorat	portiunea de transect intre sosea si capcana 1 este inundata
2016.03.14	10:00:00	275	mt					0.5	a plouat noaptea (4-5)	metamorfi Ll						innorat	portiunea de transect intre sosea si capcana 1 este inundata
2016.03.14	10:00:00	276	mt					0.5	a plouat noaptea (4-5)	metamorfi Ll						innorat	portiunea de transect intre sosea si capcana 1 este inundata
2016.03.14	10:00:00	277	mt					0.5	a plouat noaptea (4-5)	metamorfi Ll						innorat	portiunea de transect intre sosea si capcana 1 este inundata
2016.03.14	10:00:00	278	mt					0.5	a plouat noaptea (4-5)	metamorfi Ll						innorat	portiunea de transect intre sosea si capcana 1 este inundata
2016.03.14	10:00:00	279	mt					0.5	a plouat noaptea (4-5)	metamorfi Ll						innorat	portiunea de transect intre sosea si capcana 1 este inundata
2016.03.14	10:00:00	280	mt					0.5	a plouat noaptea (4-5)	metamorfi Ll						innorat	portiunea de transect intre sosea si capcana 1 este inundata
2016.03.14	10:00:00	281	mt					0.5	a plouat noaptea (4-5)	metamorfi Ll						innorat	portiunea de transect intre sosea si capcana 1 este inundata
2016.03.14	10:00:00	282	mt					0.5	a plouat noaptea (4-5)	metamorfi Ll						innorat	portiunea de transect intre sosea si capcana 1 este inundata
2016.03.14	10:00:00	283	mt					0.5	a plouat noaptea (4-5)	metamorfi Ll						innorat	portiunea de transect intre sosea si capcana 1 este inundata
2016.03.14	10:00:00	284	mt					0.5	a plouat noaptea (4-5)	metamorfi Ll						innorat	portiunea de transect intre sosea si capcana 1 este inundata
2016.03.14	10:00:00	285	mt					0.5	a plouat noaptea (4-5)	metamorfi Ll						innorat	portiunea de transect intre sosea si capcana 1 este inundata
2016.03.14	10:00:00	286	mt					0.5	a plouat noaptea (4-5)	metamorfi Ll						innorat	portiunea de transect intre sosea si capcana 1 este inundata
2016.03.14	10:00:00	287	mt					0.5	a plouat noaptea (4-5)	metamorfi Ll						innorat	portiunea de transect intre sosea si capcana 1 este inundata
2016.03.14	10:00:00	288	mt					0.5	a plouat noaptea (4-5)	metamorfi Ll						innorat	portiunea de transect intre sosea si capcana 1 este inundata
2016.03.14	10:00:00	289	mt					0.5	a plouat noaptea (4-5)	metamorfi Ll						innorat	portiunea de transect intre sosea si capcana 1 este inundata
2016.03.14	10:00:00	290	mt					0.5	a plouat noaptea (4-5)	metamorfi Ll						innorat	portiunea de transect intre sosea si capcana 1 este inundata
2016.03.14	10:00:00	291	mt					0.5	a plouat noaptea (4-5)	metamorfi Ll						innorat	portiunea de transect intre sosea si capcana 1 este inundata
2016.03.14	10:00:00	292	mt					0.5	a plouat noaptea (4-5)	metamorfi Ll						innorat	portiunea de transect intre sosea si capcana 1 este inundata
2016.03.14	10:00:00	293	mt					0.5	a plouat noaptea (4-5)	metamorfi Ll						innorat	portiunea de transect intre sosea si capcana 1 este inundata
2016.03.14	10:00:00	294	mt					0.5	a plouat noaptea (4-5)	metamorfi Ll						innorat	portiunea de transect intre sosea si capcana 1 este inundata
2016.03.14	10:00:00	295	mt					0.5	a plouat noaptea (4-5)	metamorfi Ll						innorat	portiunea de transect intre sosea si capcana 1 este inundata
2016.03.14	10:00:00	296	mt					0.5	a plouat noaptea (4-5)	metamorfi Ll						innorat	portiunea de transect intre sosea si capcana 1 este inundata
2016.03.14	10:00:00	297	mt					0.5	a plouat noaptea (4-5)	metamorfi Ll						innorat	portiunea de transect intre sosea si capcana 1 este inundata
2016.03.14	10:00:00	298	mt					0.5	a plouat noaptea (4-5)	metamorfi Ll						innorat	portiunea de transect intre sosea si capcana 1 este inundata
2016.03.14	10:00:00	299	mt					0.5	a plouat noaptea (4-5)	metamorfi Ll						innorat	portiunea de transect intre sosea si capcana 1 este inundata
2016.03.14	10:00:00	300	mt					0.5	a plouat noaptea (4-5)	metamorfi Ll						innorat	portiunea de transect intre sosea si capcana 1 este inundata
2016.03.14	10:00:00	301	mt					0.5	a plouat noaptea (4-5)	metamorfi Ll						innorat	portiunea de transect intre sosea si capcana 1 este inundata
2016.03.14	10:00:00	302	mt					0.5	a plouat noaptea (4-5)	metamorfi Ll						innorat	portiunea de transect intre sosea si capcana 1 este inundata
2016.03.14	10:00:00	303	mt					0.5	a plouat noaptea (4-5)	metamorfi Ll						innorat	portiunea de transect intre sosea si capcana 1 este inundata
2016.03.14	10:00:00	304	mt					0.5	a plouat noaptea (4-5)	metamorfi Ll						innorat	portiunea de transect intre sosea si capcana 1 este inundata
2016.03.14	10:00:00	305	mt					0.5	a plouat noaptea (4-5)	metamorfi Ll						innorat	portiunea de transect intre sosea si capcana 1 este inundata
2016.03.14	10:00:00	306	mt					0.5	a plouat noaptea (4-5)	metamorfi Ll						innorat	portiunea de transect intre sosea si capcana 1 este inundata
2016.03.14	10:00:00	307	mt					0.5	a plouat noaptea (4-5)	metamorfi Ll						innorat	portiunea de transect intre sosea si capcana 1 este inundata
2016.03.14	10:00:00	308	mt					0.5	a plouat noaptea (4-5)	metamorfi Ll						innorat	portiunea de transect intre sosea si capcana 1 este inundata
2016.03.14	10:00:00	309	mt					0.5	a plouat noaptea (4-5)	metamorfi Ll						innorat	portiunea de transect intre sosea si capcana 1 este inundata
2016.03.14	10:00:00	310	mt					0.5	a plouat noaptea (4-5)	metamorfi Ll						innorat	portiunea de transect intre sosea si capcana 1 este inundata
2016.03.14	10:00:00	311	mt					0.5	a plouat noaptea (4-5)	metamorfi Ll						innorat	portiunea de transect intre sosea si capcana 1 este inundata
2016.03.14	10:00:00	312	mt					0.5	a plouat noaptea (4-5)	metamorfi Ll						innorat	portiunea de transect intre sosea si capcana 1 este inundata
2016.03.14	10:00:00	313	mt					0.5	a plouat noaptea (4-5)	metamorfi Ll						innorat	portiunea de transect intre sosea si capcana 1 este inundata
2016.03.14	10:00:00	314	mt					0.5	a plouat noaptea (4-5)	metamorfi Ll						innorat	portiunea de transect intre sosea si capcana 1 este inundata
2016.03.14	10:00:00	315	mt					0.5	a plouat noaptea (4-5)	metamorfi Ll						innorat	portiunea de transect intre sosea si capcana 1 este inundata
2016.03.14	10:00:00	316	mt					0.5	a plouat noaptea (4-5)	metamorfi Ll						innorat	portiunea de transect intre sosea si capcana 1 este inundata
2016.03.14	10:00:00	317	mt					0.5	a plouat noaptea (4-5)	metamorfi Ll						innorat	portiunea de transect intre sosea si capcana 1 este inundata
2016.03.14	10:00:00	318	mt					0.5	a plouat noaptea (4-5)	metamorfi Ll						innorat	portiunea de transect intre sosea si capcana 1 este inundata
2016.03.14	10:00:00	319	mt					0.5	a plouat noaptea (4-5)	metamorfi Ll						innorat	portiunea de transect intre sosea si capcana 1 este inundata
2016.03.14	10:00:00	320	mt					0.5	a plouat noaptea (4-5)	metamorfi Ll						innorat	portiunea de transect intre sosea si capcana 1 este inundata
2016.03.14	10:00:00	321	mt					0.5	a plouat noaptea (4-5)	metamorfi Ll						innorat	portiunea de transect intre sosea si capcana 1 este inundata
2016.03.14	10:00:00	322	mt					0.5	a plouat noaptea (4-5)	metamorfi Ll						innorat	portiunea de transect intre sosea si capcana 1 este inundata
2016.03.14	10:00:00	323	mt					0.5	a plouat noaptea (4-5)	metamorfi Ll						innorat	portiunea de transect intre sosea si capcana 1 este inundata
2016.03.14	10:00:00	324	mt					0.5	a plouat noaptea (4-5)	metamorfi Ll						innorat	portiunea de transect intre sosea si capcana 1 este inundata
2016.03.14	10:00:00	325	mt					0.5	a plouat noaptea (4-5)	metamorfi Ll						innorat	portiunea de transect intre sosea si capcana 1 este inundata
2016.03.14	10:00:00	326	mt					0.5	a plouat noaptea (4-5)	metamorfi Ll						innorat	portiunea de transect intre sosea si capcana 1 este inundata
2016.03.14	10:00:00	327	mt					0.5	a plouat noaptea (4-5)	metamorfi Ll						innorat	portiunea de transect intre sosea si capcana 1 este inundata
2016.03.14	10:00:00	328	mt					0.5	a plouat noaptea (4-5)	metamorfi Ll						innorat	portiunea de transect intre sosea si capcana 1 este inundata
2016.03.14	10:00:00	329	mt					0.5	a plouat noaptea (4-5)	metamorfi Ll						innorat	portiunea de transect intre sosea si capcana 1 este inundata
2016.03.14	10:00:00	330	mt					0.5	a plouat noaptea (4-5)	metamorfi Ll						innorat	portiunea de transect intre sosea si capcana 1 este inundata
2016.03.14	10:00:00	331	mt					0.5	a plouat noaptea (4-5)	metamorfi Ll						innorat	portiunea de transect intre sosea si capcana 1 este inundata
2016.03.14	10:00:00	332	mt					0.5	a plouat noaptea (4-5)	metamorfi Ll						innorat	portiunea de transect intre sosea si capcana 1 este inundata
2016.03.14	10:00:00	333	mt					0.5	a plouat noaptea (4-5)	metamorfi Ll						innorat	portiunea de transect intre sosea si capcana 1 este inundata
2016.03.14	10:00:00	334	mt					0.5	a plouat noaptea (4-5)	metamorfi Ll						innorat	portiunea de transect intre sosea si capcana 1 este inundata
2016.03.14	10:00:00	335	mt					0.5	a plouat noaptea (4-5)	metamorfi Ll						innorat	portiunea de transect intre sosea si capcana 1 este inundata
2016.03.14	10:00:00	336	mt					0.5	a plouat noaptea (4-5)	metamorfi Ll						innorat	portiunea de transect intre sosea si capcana 1 este inundata
2016.03.14	10:00:00	337	mt					0.5	a plouat noaptea (4-5)	metamorfi Ll						innorat	portiunea de transect intre sosea si capcana 1 este inundata
2016.03.14	10:00:00	338	mt					0.5	a plouat noaptea (4-5)	metamorfi Ll						innorat	portiunea de transect intre sosea si capcana 1 este inundata
2016.03.14	10:00:00	339	mt					0.5	a plouat noaptea (4-5)	metamorfi Ll						innorat	portiunea de transect intre sosea si capcana 1 este inundata
2016.03.14	10:00:00	340	mt					0.5	a plouat noaptea (4-5)	metamorfi Ll						innorat	portiunea de transect intre sosea si capcana 1 este inundata
2016.03.14	10:00:00	341	mt					0.5	a plouat noaptea (4-5)	metamorfi Ll						innorat	portiunea de transect intre sosea si capcana 1 este inundata
2016.03.14	10:00:00	342	mt					0.5	a plouat noaptea (4-5)	metamorfi Ll						innorat	portiunea de transect intre sosea si capcana 1 este inundata
2016.03.14	10:00:00	343	mt					0.5	a plouat noaptea (4-5)	metamorfi Ll						innorat	portiunea de transect intre sosea si capcana 1 este inundata
2016.03.14	10:00:00	344	mt					0.5	a plouat noaptea (4-5)	metamorfi Ll						innorat	portiunea de transect intre sosea si capcana 1 este inundata
2016.03.14	10:00:00	345	mt					0.5	a plouat noaptea (4-5)	metamorfi Ll						innorat	portiunea de transect intre sosea si capcana 1 este inundata
2016.03.14	10:00:00	346	mt					0.5	a plouat noaptea (4-5)	metamorfi Ll						innorat	portiunea de transect intre sosea si capcana 1 este inundata
2016.03.14	10:00:00	347	mt					0.5	a plouat noaptea (4-5)	metamorfi Ll						innorat	portiunea de transect intre sosea si capcana 1 este inundata
2016.03.14	10:00:00	348	mt					0.5	a plouat noaptea (4-5)	metamorfi Ll						innorat	portiunea de transect intre sosea si capcana 1 este inundata
2016.03.14	10:00:00	349	mt					0.5	a plouat noaptea (4-5)	metamorfi Ll						innorat	portiunea de transect intre sosea si capcana 1 este inundata
2016.03.14	10:00:00	350	mt					0.5	a plouat noaptea (4-5)	metamorfi Ll						innorat	portiunea de transect intre sosea si capcana 1 este inundata
2016.03.14	10:00:00	351	mt					0.5	a plouat noaptea (4-5)	metamorfi Ll						innorat	portiunea de transect intre sosea si capcana 1 este inundata
2016.03.14	10:00:00	352	mt					0.5	a plouat noaptea (4-5)	metamorfi Ll						innorat	portiunea de transect intre sosea si capcana 1 este inundata
2016.03.14	10:00:00	353	mt					0.5	a plouat noaptea (4-5)	metamorfi Ll						innorat	portiunea de transect intre sosea si capcana 1 este inundata
2016.03.14	10:00:00	354	mt					0.5	a plouat noaptea (4-5)	metamorfi Ll						innorat	portiunea de transect intre sosea si capcana 1 este inundata
2016.03.14	10:00:00	355	mt					0.5	a plouat noaptea (4-5)	metamorfi Ll						innorat	portiunea de transect intre sosea si capcana 1 este inundata
2016.03.14	10:00:00	356	mt					0.5	a plouat noaptea (4-5)	metamorfi Ll						innorat	portiunea de transect intre sosea si capcana 1 este inundata
2016.03.14	10:00:00	357	mt					0.5	a plouat noaptea (4-5)	metamorfi Ll						innorat	portiunea de transect intre sosea si capcana 1 este inundata
2016.03.14	10:00:00	358	mt					0.5	a plouat noaptea (4-5)	metamorfi Ll						innorat	portiunea de transect intre sosea si capcana 1 este inundata
2016.03.14	10:00:00	359	mt					0.5	a plouat noaptea (4-5)	metamorfi Ll						innorat	portiunea de transect intre sosea si capcana 1 este inundata
2016.03.14	10:00:00	360	mt					0.5	a plouat noaptea (4-5)	metamorfi Ll						innorat	portiunea de transect intre sosea si capcana 1 este inundata
2016.03.14	10:00:00	361	mt					0.5	a plouat noaptea (4-5)	metamorfi Ll						innorat	portiunea de transect intre sosea si capcana 1 este inundata
2016.03.14	10:00:00	362	mt					0.5	a plouat noaptea (4-5)	metamorfi Ll						innorat	portiunea de transect intre sosea si capcana 1 este inundata
2016.03.14	10:00:00	363	mt					0.5	a plouat noaptea (4-5)	metamorfi Ll						innorat	portiunea de transect intre sosea si capcana 1 este inundata
2016.03.14	10:00:00	364	mt					0.5	a plouat noaptea (4-5)	metamorfi Ll						innorat	portiunea de transect intre sosea si capcana 1 este inundata
2016.03.14	10:00:00	365	mt					0.5	a plouat noaptea (4-5)	metamorfi Ll						innorat	portiunea de transect intre sosea si capcana 1 este inundata
2016.03.14	10:00:00	366	mt					0.5	a plouat noaptea (4-5)	metamorfi Ll						innorat	portiunea de transect intre sosea si capcana 1 este inundata
2016.03.14	10:00:00	367	mt					0.5	a plouat noaptea (4-5)	metamorfi Ll						innorat	portiunea de transect intre sosea si capcana 1 este inundata
2016.03.14	10:00:00	368	mt					0.5	a plouat noaptea (4-5)	metamorfi Ll						innorat	portiunea de transect intre sosea si capcana 1 este inundata
2016.03.14	10:00:00	369	mt					0.5	a plouat noaptea (4-5)	metamorfi Ll						innorat	portiunea de transect intre sosea si capcana 1 este inundata
2016.03.14	10:00:00	370	mt					0.5	a plouat noaptea (4-5)	metamorfi Ll						innorat	portiunea de transect intre sosea si capcana 1 este inundata
2016.03.14	10:00:00	371	mt					0.5	a plouat noaptea (4-5)	metamorfi Ll						innorat	portiunea de transect intre sosea si capcana 1 este inundata
2016.03.14	10:00:00	372	mt					0.5	a plouat noaptea (4-5)	metamorfi Ll						innorat	portiunea de transect intre sosea si capcana 1 este inundata
2016.03.14	10:00:00	373	mt					0.5	a plouat noaptea (4-5)	metamorfi Ll						innorat	portiunea de transect intre sosea si capcana 1 este inundata
2016.03.14	10:00:00	374	mt					0.5	a plouat noaptea (4-5)	metamorfi Ll						innorat	portiunea de transect intre sosea si capcana 1 este inundata
2016.03.14	10:00:00	375	mt					0.5	a plouat noaptea (4-5)	metamorfi Ll						innorat	portiunea de transect intre sosea si capcana 1 este inundata
2016.03.14	10:00:00	376	mt					0.5	a plouat noaptea (4-5)	metamorfi Ll						innorat	portiunea de transect intre sosea si capcana 1 este inundata
2016.03.14	10:00:00	377	mt					0.5	a plouat noaptea (4-5)	metamorfi Ll						innorat	portiunea de transect intre sosea si capcana 1 este inundata
2016.03.14	10:00:00	378	mt					0.5	a plouat noaptea (4-5)	metamorfi Ll						innorat	portiunea de transect intre sosea si capcana 1 este inundata
2016.03.14	10:00:00	379	mt					0.5	a plouat noaptea (4-5)	metamorfi Ll						innorat	portiunea de transect intre sosea si capcana 1 este inundata
2016.03.14	10:00:00	380	mt					0.5	a plouat noaptea (4-5)	metamorfi Ll						innorat	portiunea de transect intre sosea si capcana 1 este inundata
2016.03.14	10:00:00	381	mt					0.5	a plouat noaptea (4-5)	metamorfi Ll						innorat	portiunea de transect intre sosea si capcana 1 este inundata
2016.03.14	10:00:00	382	mt					0.5	a plouat noaptea (4-5)	metamorfi Ll						innorat	portiunea de transect intre sosea si capcana 1 este inundata
2016.03.14	10:00:00	383	mt					0.5	a plouat noaptea (4-5)	metamorfi Ll						innorat	portiunea de transect intre sosea si capcana 1 este inundata
2016.03.14	10:00:00	384	mt					0.5	a plouat noaptea (4-5)	metamorfi Ll						innorat	portiunea de transect intre sosea si capcana 1 este inundata
2016.03.14	10:00:00	385	mt					0.5	a plouat noaptea (4-5)	metamorfi Ll						innorat	portiunea de transect intre sosea si capcana 1 este inundata
2016.03.14	10:00:00	386	mt					0.5	a plouat noaptea (4-5)	metamorfi Ll						innorat	portiunea de transect intre sosea si capcana 1 este inundata
2016.03.14	10:00:00	387	mt					0.5	a plouat noaptea (4-5)	metamorfi Ll						innorat	portiunea de transect intre sosea si capcana 1 este inundata
2016.03.14	10:00:00	388	mt					0.5	a plouat noaptea (4-5)	metamorfi Ll						innorat	portiunea de transect intre sosea si capcana 1 este inundata
2016.03.14	10:00:00	389	mt					0.5	a plouat noaptea (4-5)	metamorfi Ll						innorat	portiunea de transect intre sosea si capcana 1 este inundata
2016.03.14	10:00:00	390	mt					0.5	a plouat noaptea (4-5)	metamorfi Ll						innorat	portiunea de transect intre sosea si capcana 1 este inundata
2016.03.14	10:00:00	391	mt					0.5	a plouat noaptea (4-5)	metamorfi Ll						innorat	portiunea de transect intre sosea si capcana 1 este inundata
2016.03.14	10:00:00	392	mt					0.5	a plouat noaptea (4-5)	metamorfi Ll						innorat	portiunea de transect intre sosea si capcana 1 este inundata
2016.03.14	10:00:00	393	mt					0.5	a plouat noaptea (4-5)	metamorfi Ll						innorat	portiunea de transect intre sosea si capcana 1 este inundata
2016.03.14	10:00:00	394	mt					0.5	a plouat noaptea (4-5)	metamorfi Ll						innorat	portiunea de transect intre sosea si capcana 1 este inundata
2016.03.14	10:00:00	395	mt					0.5	a plouat noaptea (4-5)	metamorfi Ll						innorat	portiunea de transect intre sosea si capcana 1 este inundata
2016.03.14	10:00:00	396	mt					0.5	a plouat noaptea (4-5)	metamorfi Ll						innorat	portiunea de transect intre sosea si capcana 1 este inundata
2016.03.14	10:00:00	397	mt					0.5	a plouat noaptea (4-5)	metamorfi Ll						innorat	portiunea de transect intre sosea si capcana 1 este inundata
2016.03.14	10:00:00	398	mt					0.5	a plouat noaptea (4-5)	metamorfi Ll						innorat	portiunea de transect intre sosea si capcana 1 este inundata
2016.03.14	10:00:00	399	mt					0.5	a plouat noaptea (4-5)	metamorfi Ll						innorat	portiunea de transect intre sosea si capcana 1 este inundata
2016.03.14	10:00:00	400	mt					0.5	a plouat noaptea (4-5)	metamorfi Ll						innorat	portiunea de transect intre sosea si capcana 1 este inundata
2016.03.14	10:00:00	401	mt					0.5	a plouat noaptea (4-5)	metamorfi Ll						innorat	portiunea de transect intre sosea si capcana 1 este inundata
2016.03.14	10:00:00	402	mt					0.5	a plouat noaptea (4-5)	metamorfi Ll						innorat	portiunea de transect intre sosea si capcana 1 este inundata
2016.03.14	10:00:00	403	mt					0.5	a plouat noaptea (4-5)	metamorfi Ll						innorat	portiunea de transect intre sosea si capcana 1 este inundata
2016.03.14	10:00:00	404	mt					0.5	a plouat noaptea (4-5)	metamorfi Ll						innorat	portiunea de transect intre sosea si capcana 1 este inundata
2016.03.14	10:00:00	405	mt					0.5	a plouat noaptea (4-5)	metamorfi Ll						innorat	portiunea de transect intre sosea si capcana 1 este inundata
2016.03.14	10:00:00	406	mt					0.5	a plouat noaptea (4-5)	metamorfi Ll						innorat	portiunea de transect intre sosea si capcana 1 este inundata
2016.03.14	10:00:00	407	mt					0.5	a plouat noaptea (4-5)	metamorfi Ll						innorat	portiunea de transect intre sosea si capcana 1 este inundata
2016.03.14	10:00:00	408	mt					0.5	a plouat noaptea (4-5)	metamorfi Ll						innorat	portiunea de transect intre sosea si capcana 1 este inundata
2016.03.14	10:00:00	409	mt					0.5	a plouat noaptea (4-5)	metamorfi Ll						innorat	portiunea de transect intre sosea si capcana 1 este inundata
2016.03.14	10:00:00	410	mt					0.5	a plouat noaptea (4-5)	metamorfi Ll						innorat	portiunea de transect intre sosea si capcana 1 este inundata
2016.03.14	10:00:00	411	mt					0.5	a plouat noaptea (4-5)	metamorfi Ll						innorat	portiunea de transect intre sosea si capcana 1 este inundata
2016.03.14	10:00:00	412	mt					0.5	a plouat noaptea (4-5)	metamorfi Ll						innorat	portiunea de transect intre sosea si capcana 1 este inundata
2016.03.14	10:00:00	413	mt					0.5	a plouat noaptea (4-5)	metamorfi Ll						innorat	portiunea de transect intre sosea si capcana 1 este inundata
2016.03.14	10:00:00	414	mt					0.5	a plouat noaptea (4-5)	metamorfi Ll						innorat	portiunea de transect intre sosea si capcana 1 este inundata
2016.03.14	10:00:00	415	mt					0.5	a plouat noaptea (4-5)	metamorfi Ll						innorat	portiunea de transect intre sosea si capcana 1 este inundata
2016.03.14	10:00:00	416	mt					0.5	a plouat noaptea (4-5)	metamorfi Ll						innorat	portiunea de transect intre sosea si capcana 1 este inundata
2016.03.14	10:00:00	417	mt					0.5	a plouat noaptea (4-5)	metamorfi Ll						innorat	portiunea de transect intre sosea si capcana 1 este inundata
2016.03.14	10:00:00	418	mt					0.5	a plouat noaptea (4-5)	metamorfi Ll						innorat	portiunea de transect intre sosea si capcana 1 este inundata
2016.03.14	10:00:00	419	mt					0.5	a plouat noaptea (4-5)	metamorfi Ll						innorat	portiunea de transect intre sosea si capcana 1 este inundata
2016.03.14	10:00:00	420	mt					0.5	a plouat noaptea (4-5)	metamorfi Ll						innorat	portiunea de transect intre sosea si capcana 1 este inundata
2016.03.14	10:00:00	421	mt					0.5	a plouat noaptea (4-5)	metamorfi Ll						innorat	portiunea de transect intre sosea si capcana 1 este inundata
2016.03.14	10:00:00	422	mt					0.5	a plouat noaptea (4-5)	metamorfi Ll						innorat	portiunea de transect intre sosea si capcana 1 este inundata
2016.03.14	10:00:00	423	mt					0.5	a plouat noaptea (4-5)	metamorfi Ll						innorat	portiunea de transect intre sosea si capcana 1 este inundata
2016.03.14	10:00:00	424	mt					0.5	a plouat noaptea (4-5)	metamorfi Ll						innorat	portiunea de transect intre sosea si capcana 1 este inundata
2016.03.14	10:00:00	425	mt					0.5	a plouat noaptea (4-5)	metamorfi Ll						innorat	portiunea de transect intre sosea si capcana 1 este inundata
2016.03.14	10:00:00	426	mt					0.5	a plouat noaptea (4-5)	metamorfi Ll						innorat	portiunea de transect intre sosea si capcana 1 este inundata
2016.03.14	10:00:00	427	mt					0.5	a plouat noaptea (4-5)	metamorfi Ll						innorat	portiunea de transect intre sosea si capcana 1 este inundata
2016.03.14	10:00:00	428	mt					0.5	a plouat noaptea (4-5)	metamorfi Ll						innorat	portiunea de transect intre sosea si capcana 1 este inundata
2016.03.14	10:00:00	429	mt					0.5	a plouat noaptea (4-5)	metamorfi Ll						innorat	portiunea de transect intre sosea si capcana 1 este inundata
2016.03.14	10:00:00	430	mt					0.5	a plouat noaptea (4-5)	metamorfi Ll						innorat	portiunea de transect intre sosea si capcana 1 este inundata
2016.03.14	10:00:00	431	mt					0.5	a plouat noaptea (4-5)	metamorfi Ll						innorat	portiunea de transect intre sosea si capcana 1 este inundata
2016.03.14	10:00:00	432	mt					0.5	a plouat noaptea (4-5)	metamorfi Ll						innorat	portiunea de transect intre sosea si capcana 1 este inundata
2016.03.14	10:00:00	433	mt					0.5	a plouat noaptea (4-5)	metamorfi Ll						innorat	portiunea de transect intre sosea si capcana 1 este inundata
2016.03.14	10:00:00	434	mt					0.5	a plouat noaptea (4-5)	metamorfi Ll						innorat	portiunea de transect intre sosea si capcana 1 este inundata
2016.03.14	10:00:00	435	mt					0.5	a plouat noaptea (4-5)	metamorfi Ll						innorat	portiunea de transect intre sosea si capcana 1 este inundata
2016.03.14	10:00:00	436	mt					0.5	a plouat noaptea (4-5)	metamorfi Ll						innorat	portiunea de transect intre sosea si capcana 1 este inundata
2016.03.14	10:00:00	437	mt					0.5	a plouat noaptea (4-5)	metamorfi Ll						innorat	portiunea de transect intre sosea si capcana 1 este inundata
2016.03.14	10:00:00	438	mt					0.5	a plouat noaptea (4-5)	metamorfi Ll						innorat	portiunea de transect intre sosea si capcana 1 este inundata
2016.03.14	10:00:00	439	mt					0.5	a plouat noaptea (4-5)	metamorfi Ll						innorat	portiunea de transect intre sosea si capcana 1 este inundata
2016.03.14	10:00:00	440	mt					0.5	a plouat noaptea (4-5)	metamorfi Ll						innorat	portiunea de transect intre sosea si capcana 1 este inundata
2016.03.14	10:00:00	441	mt					0.5	a plouat noaptea (4-5)	metamorfi Ll						innorat	portiunea de transect intre sosea si capcana 1 este inundata
2016.03.14	10:00:00	442	mt					0.5	a plouat noaptea (4-5)	metamorfi Ll						innorat	portiunea de transect intre sosea si capcana 1 este inundata
2016.03.14	10:00:00	443	mt					0.5	a plouat noaptea (4-5)	metamorfi Ll						innorat	portiunea de transect intre sosea si capcana 1 este inundata
2016.03.14	10:00:00	444	mt					0.5	a plouat noaptea (4-5)	metamorfi Ll						innorat	portiunea de transect intre sosea si capcana 1 este inundata
2016.03.14	10:00:00	445	mt					0.5	a plouat noaptea (4-5)	metamorfi Ll						innorat	portiunea de transect intre sosea si capcana 1 este inundata
2016.03.14	10:00:00	446	mt					0.5	a plouat noaptea (4-5)	metamorfi Ll						innorat	portiunea de transect intre sosea si capcana 1 este inundata
2016.03.14	10:00:00	447	mt					0.5	a plouat noaptea (4-5)	metamorfi Ll						innorat	portiunea de transect intre sosea si capcana 1 este inundata
2016.03.14	10:00:00	448	mt					0.5	a plouat noaptea (4-5)	metamorfi Ll						innorat	portiunea de transect intre sosea si capcana 1 este inundata
2016.03.14	10:00:00	449	mt					0.5	a plouat noaptea (4-5)	metamorfi Ll						innorat	portiunea de transect intre sosea si capcana 1 este inundata
2016.03.14	10:00:00	450	mt					0.5	a plouat noaptea (4-5)	metamorfi Ll						innorat	portiunea de transect intre sosea si capcana 1 este inundata
2016.03.14	10:00:00	451	mt					0.5	a plouat noaptea (4-5)	metamorfi Ll						innorat	portiunea de transect intre sosea si capcana 1 este inundata
2016.03.14	10:00:00	452	mt					0.5	a plouat noaptea (4-5)	metamorfi Ll						innorat	portiunea de transect intre sosea si capcana 1 este inundata
2016.03.14	10:00:00	453	mt					0.5	a plouat noaptea (4-5)	metamorfi Ll						innorat	portiunea de transect intre sosea si capcana 1 este inundata
2016.03.14	10:00:00	454	mt					0.5	a plouat noaptea (4-5)	metamorfi Ll						innorat	portiunea de transect intre sosea si capcana 1 este inundata
2016.03.14	10:00:00	455	mt					0.5	a plouat noaptea (4-5)	metamorfi Ll						innorat	portiunea de transect intre sosea si capcana 1 este inundata
2016.03.14	10:00:00	456	mt					0.5	a plouat noaptea (4-5)	metamorfi Ll						innorat	portiunea de transect intre sosea si capcana 1 este inundata
2016.03.14	10:00:00	457	mt					0.5	a plouat noaptea (4-5)	metamorfi Ll						innorat	portiunea de transect intre sosea si capcana 1 este inundata
2016.03.14	10:00:00	458	mt					0.5	a plouat noaptea (4-5)	metamorfi Ll						innorat	portiunea de transect intre sosea si capcana 1 este inundata
2016.03.14	10:00:00	459	mt					0.5	a plouat noaptea (4-5)	metamorfi Ll						innorat	portiunea de transect intre sosea si capcana 1 este inundata
2016.03.14	10:00:00	460	mt					0.5	a plouat noaptea (4-5)	metamorfi Ll						innorat	portiunea de transect intre sosea si capcana 1 este inundata
2016.03.14	10:00:00	461	mt					0.5	a plouat noaptea (4-5)	metamorfi Ll						innorat	portiunea de transect intre sosea si capcana 1 este inundata
2016.03.14	10:00:00	462	mt					0.5	a plouat noaptea (4-5)	metamorfi Ll						innorat	portiunea de transect intre sosea si capcana 1 este inundata
2016.03.14	10:00:00	463	mt					0.5	a plouat noaptea (4-5)	metamorfi Ll						innorat	portiunea de transect intre sosea si capcana 1 este inundata
2016.03.14	10:00:00	464	mt					0.5	a plouat noaptea (4-5)	metamorfi Ll						innorat	portiunea de transect intre sosea si capcana 1 este inundata
2016.03.14	10:00:00	465	mt					0.5	a plouat noaptea (4-5)	metamorfi Ll						innorat	portiunea de transect intre sosea si capcana 1 este inundata
2016.03.14	10:00:00	466	mt					0.5	a plouat noaptea (4-5)	metamorfi Ll						innorat	portiunea de transect intre sosea si capcana 1 este inundata
2016.03.14	10:00:00	467	mt					0.5	a plouat noaptea (4-5)	metamorfi Ll						innorat	portiunea de transect intre sosea si capcana 1 este inundata
2016.03.14	10:00:00	468	mt					0.5	a plouat noaptea (4-5)	metamorfi Ll						innorat	portiunea de transect intre sosea si capcana 1 este inundata
2016.03.14	10:00:00	469	mt					0.5	a plouat noaptea (4-5)	metamorfi Ll						innorat	portiunea de transect intre sosea si capcana 1 este inundata
2016.03.14	10:00:00	470	mt					0.5	a plouat noaptea (4-5)	metamorfi Ll						innorat	portiunea de transect intre sosea si capcana 1 este inundata
2016.03.14	10:00:00	471	mt					0.5	a plouat noaptea (4-5)	metamorfi Ll						innorat	portiunea de transect intre sosea si capcana 1 este inundata
2016.03.14	10:00:00	472	mt					0.5	a plouat noaptea (4-5)	metamorfi Ll						innorat	portiunea de transect intre sosea si capcana 1 este inundata
2016.03.14	10:00:00	473	mt					0.5	a plouat noaptea (4-5)	metamorfi Ll						innorat	portiunea de transect intre sosea si capcana 1 este inundata
2016.03.14	10:00:00	474	mt					0.5	a plouat noaptea (4-5)	metamorfi Ll						innorat	portiunea de transect intre sosea si capcana 1 este inundata
2016.03.14	10:00:00	475	mt					0.5	a plouat noaptea (4-5)	metamorfi Ll						innorat	portiunea de transect intre sosea si capcana 1 este inundata
2016.03.14	10:00:00	476	mt					0.5	a plouat noaptea (4-5)	metamorfi Ll						innorat	portiunea de transect intre sosea si capcana 1 este inundata
2016.03.14	10:00:00	477	mt					0.5	a plouat noaptea (4-5)	metamorfi Ll						innorat	portiunea de transect intre sosea si capcana 1 este inundata
2016.03.14	10:00:00	478	mt					0.5	a plouat noaptea (4-5)	metamorfi Ll						innorat	portiunea de transect intre sosea si capcana 1 este inundata
2016.03.14	10:00:00	479	mt					0.5	a plouat noaptea (4-5)	metamorfi Ll						innorat	portiunea de transect intre sosea si capcana 1 este inundata
2016.03.14	10:00:00	480	mt					0.5	a plouat noaptea (4-5)	metamorfi Ll						innorat	portiunea de transect intre sosea si capcana 1 este inundata
2016.03.14	10:00:00	481	mt					0.5	a plouat noaptea (4-5)	metamorfi Ll						innorat	portiunea de transect intre sosea si capcana 1 este inundata
2016.03.14	10:00:00	482	mt					0.5	a plouat noaptea (4-5)	metamorfi Ll						innorat	portiunea de transect intre sosea si capcana 1 este inundata
2016.03.14	10:00:00	483	mt					0.5	a plouat noaptea (4-5)	metamorfi Ll						innorat	portiunea de transect intre sosea si capcana 1 este inundata
2016.03.14	10:00:00	484	mt					0.5	a plouat noaptea (4-5)	metamorfi Ll						innorat	portiunea de transect intre sosea si capcana 1 este inundata
2016.03.14	10:00:00	485	mt					0.5	a plouat noaptea (4-5)	metamorfi Ll						innorat	portiunea de transect intre sosea si capcana 1 este inundata
2016.03.14	10:00:00	486	mt					0.5	a plouat noaptea (4-5)	metamorfi Ll						innorat	portiunea de transect intre sosea si capcana 1 este inundata
2016.03.14	10:00:00	487	mt					0.5	a plouat noaptea (4-5)	metamorfi Ll						innorat	portiunea de transect intre sosea si capcana 1 este inundata
2016.03.14	10:00:00	488	mt					0.5	a plouat noaptea (4-5)	metamorfi Ll						innorat	portiunea de transect intre sosea si capcana 1 este inundata
2016.03.14	10:00:00	489	mt					0.5	a plouat noaptea (4-5)	metamorfi Ll						innorat	portiunea de transect intre sosea si capcana 1 este inundata
2016.03.14	10:00:00	490	mt					0.5	a plouat noaptea (4-5)	metamorfi Ll						innorat	portiunea de transect intre sosea si capcana 1 este inundata
2016.03.14	10:00:00	491	mt					0.5	a plouat noaptea (4-5)	metamorfi Ll						innorat	portiunea de transect intre sosea si capcana 1 este inundata
2016.03.14	10:00:00	492	mt					0.5	a plouat noaptea (4-5)	metamorfi Ll						innorat	portiunea de transect intre sosea si capcana 1 este inundata
2016.03.14	10:00:00	493	mt					0.5	a plouat noaptea (4-5)	metamorfi Ll						innorat	portiunea de transect intre sosea si capcana 1 este inundata
2016.03.14	10:00:00	494	mt					0.5	a plouat noaptea (4-5)	metamorfi Ll						innorat	portiunea de transect intre sosea si capcana 1 este inundata
2016.03.14	10:00:00	495	mt					0.5	a plouat noaptea (4-5)	metamorfi Ll						innorat	portiunea de transect intre sosea si capcana 1 este inundata
2016.03.14	10:00:00	496	mt					0.5	a plouat noaptea (4-5)	metamorfi Ll						innorat	portiunea de transect intre sosea si capcana 1 este inundata
2016.03.14	10:00:00	497	mt					0.5	a plouat noaptea (4-5)	metamorfi Ll						innorat	portiunea de transect intre sosea si capcana 1 este inundata
2016.03.14	10:00:00	498	mt					0.5	a plouat noaptea (4-5)	metamorfi Ll						innorat	portiunea de transect intre sosea si capcana 1 este inundata
2016.03.14	10:00:00	499	mt					0.5	a plouat noaptea (4-5)	metamorfi Ll						innorat	portiunea de transect intre sosea si capcana 1 este inundata
2016.03.14	10:00:00	500	mt					0.5	a plouat noaptea (4-5)	metamorfi Ll						innorat	portiunea de transect intre sosea si capcana 1 este inundata
2016.03.14	10:00:00	1	mt					0.5	a plouat noaptea (4-5)	metamorfi Ll						innorat	portiunea de transect intre sosea si capcana 1 este inundata
2016.03.14	10:00:00	2	mt					0.5	a plouat noaptea (4-5)	metamorfi Ll						innorat	portiunea de transect intre sosea si capcana 1 este inundata
2016.03.14	10:00:00	3	mt					0.5	a plouat noaptea (4-5)	metamorfi Ll						innorat	portiunea de transect intre sosea si capcana 1 este inundata
2016.03.14	10:00:00	4	mt					0.5	a plouat noaptea (4-5)	metamorfi Ll						innorat	portiunea de transect intre sosea si capcana 1 este inundata
2016.03.14	10:00:00	5	mt					0.5	a plouat noaptea (4-5)	metamorfi Ll						innorat	portiunea de transect intre sosea si capcana 1 este inundata
2016.03.14	10:00:00	6	mt					0.5	a plouat noaptea (4-5)	metamorfi Ll						innorat	portiunea de transect intre sosea si capcana 1 este inundata
2016.03.14	10:00:00	7	mt					0.5	a plouat noaptea (4-5)	metamorfi Ll						innorat	portiunea de transect intre sosea si capcana 1 este inundata
2016.03.14	10:00:00	8	mt					0.5	a plouat noaptea (4-5)	metamorfi Ll						innorat	portiunea de transect intre sosea si capcana 1 este inundata
2016.03.14	10:00:00	9	mt					0.5	a plouat noaptea (4-5)	metamorfi Ll						innorat	portiunea de transect intre sosea si capcana 1 este inundata
2016.03.14	10:00:00	10	mt					0.5	a plouat noaptea (4-5)	metamorfi Ll						innorat	portiunea de transect intre sosea si capcana 1 este inundata
2016.03.14	10:00:00	11	mt					0.5	a plouat noaptea (4-5)	metamorfi Ll						innorat	portiunea de transect intre sosea si capcana 1 este inundata
2016.03.14	10:00:00	12	mt					0.5	a plouat noaptea (4-5)	metamorfi Ll						innorat	portiunea de transect intre sosea si capcana 1 este inundata
2016.03.14	10:00:00	13	mt					0.5	a plouat noaptea (4-5)	metamorfi Ll						innorat	portiunea de transect intre sosea si capcana 1 este inundata
2016.03.14	10:00:00	14	mt					0.5	a plouat noaptea (4-5)	metamorfi Ll						innorat	portiunea de transect intre sosea si capcana 1 este inundata
2016.03.14	10:00:00	15	mt					0.5	a plouat noaptea (4-5)	metamorfi Ll						innorat	portiunea de transect intre sosea si capcana 1 este inundata
2016.03.14	10:00:00	16	mt					0.5	a plouat noaptea (4-5)	metamorfi Ll						innorat	portiunea de transect intre sosea si capcana 1 este inundata
2016.03.14	10:00:00	17	mt					0.5	a plouat noaptea (4-5)	metamorfi Ll						innorat	portiunea de transect intre sosea si capcana 1 este inundata
2016.03.14	10:00:00	18	mt					0.5	a plouat noaptea (4-5)	metamorfi Ll						innorat	portiunea de transect intre sosea si capcana 1 este inundata
2016.03.14	10:00:00	19	mt					0.5	a plouat noaptea (4-5)	metamorfi Ll						innorat	portiunea de transect intre sosea si capcana 1 este inundata
2016.03.14	10:00:00	20	mt					0.5	a plouat noaptea (4-5)	metamorfi Ll						innorat	portiunea de transect intre sosea si capcana 1 este inundata
2016.03.14	10:00:00	21	mt					0.5	a plouat noaptea (4-5)	metamorfi Ll						innorat	portiunea de transect intre sosea si capcana 1 este inundata
2016.03.14	10:00:00	22	mt					0.5	a plouat noaptea (4-5)	metamorfi Ll						innorat	portiunea de transect intre sosea si capcana 1 este inundata
2016.03.14	10:00:00	23	mt					0.5	a plouat noaptea (4-5)	metamorfi Ll						innorat	portiunea de transect intre sosea si capcana 1 este inundata
2016.03.14	10:00:00	24	mt					0.5	a plouat noaptea (4-5)	metamorfi Ll						innorat	portiunea de transect intre sosea si capcana 1 este inundata
2016.03.14	10:00:00	25	mt					0.5	a plouat noaptea (4-5)	metamorfi Ll						innorat	portiunea de transect intre sosea si capcana 1 este inundata
2016.03.14	10:00:00	26	mt					0.5	a plouat noaptea (4-5)	metamorfi Ll						innorat	portiunea de transect intre sosea si capcana 1 este inundata
2016.03.14	10:00:00	27	mt					0.5	a plouat noaptea (4-5)	metamorfi Ll						innorat	portiunea de transect intre sosea si capcana 1 este inundata
2016.03.14	10:00:00	28	mt					0.5	a plouat noaptea (4-5)	metamorfi Ll						innorat	portiunea de transect intre sosea si capcana 1 este inundata
2016.03.14	10:00:00	29	mt					0.5	a plouat noaptea (4-5)	metamorfi Ll						innorat	portiunea de transect intre sosea si capcana 1 este inundata
2016.03.14	10:00:00	30	mt					0.5	a plouat noaptea (4-5)	metamorfi Ll						innorat	portiunea de transect intre sosea si capcana 1 este inundata
2016.03.14	10:00:00	31	mt					0.5	a plouat noaptea (4-5)	metamorfi Ll						innorat	portiunea de transect intre sosea si capcana 1 este inundata
2016.03.14	10:00:00	32	mt					0.5	a plouat noaptea (4-5)	metamorfi Ll						innorat	portiunea de transect intre sosea si capcana 1 este inundata
2016.03.14	10:00:00	33	mt					0.5	a plouat noaptea (4-5)	metamorfi Ll						innorat	portiunea de transect intre sosea si capcana 1 este inundata
2016.03.14	10:00:00	34	mt					0.5	a plouat noaptea (4-5)	metamorfi Ll						innorat	portiunea de transect intre sosea si capcana 1 este inundata
2016.03.14	10:00:00	35	mt					0.5	a plouat noaptea (4-5)	metamorfi Ll						innorat	portiunea de transect intre sosea si capcana 1 este inundata
2016.03.14	10:00:00	36	mt					0.5	a plouat noaptea (4-5)	metamorfi Ll						innorat	portiunea de transect intre sosea si capcana 1 este inundata
2016.03.14	10:00:00	37	mt					0.5	a plouat noaptea (4-5)	metamorfi Ll						innorat	portiunea de transect intre sosea si capcana 1 este inundata
2016.03.14	10:00:00	38	mt					0.5	a plouat noaptea (4-5)	metamorfi Ll						innorat	portiunea de transect intre sosea si capcana 1 este inundata
2016.03.14	10:00:00	39	mt					0.5	a plouat noaptea (4-5)	metamorfi Ll						innorat	portiunea de transect intre sosea si capcana 1 este inundata
2016.03.14	10:00:00	40	mt					0.5	a plouat noaptea (4-5)	metamorfi Ll						innorat	portiunea de transect intre sosea si capcana 1 este inundata
2016.03.14	10:00:00	41	mt					0.5	a plouat noaptea (4-5)	metamorfi Ll						innorat	portiunea de transect intre sosea si capcana 1 este inundata
2016.03.14	10:00:00	42	mt					0.5	a plouat noaptea (4-5)	metamorfi Ll						innorat	portiunea de transect intre sosea si capcana 1 este inundata
2016.03.14	10:00:00	43	mt					0.5	a plouat noaptea (4-5)	metamorfi Ll						innorat	portiunea de transect intre sosea si capcana 1 este inundata
2016.03.14	10:00:00	44	mt					0.5	a plouat noaptea (4-5)	metamorfi Ll						innorat	portiunea de transect intre sosea si capcana 1 este inundata
2016.03.14	10:00:00	45	mt					0.5	a plouat noaptea (4-5)	metamorfi Ll						innorat	portiunea de transect intre sosea si capcana 1 este inundata
2016.03.14	10:00:00	46	mt					0.5	a plouat noaptea (4-5)	metamorfi Ll						innorat	portiunea de transect intre sosea si capcana 1 este inundata
2016.03.14	10:00:00	47	mt					0.5	a plouat noaptea (4-5)	metamorfi Ll						innorat	portiunea de transect intre sosea si capcana 1 este inundata
2016.03.14	10:00:00	48	mt					0.5	a plouat noaptea (4-5)	metamorfi Ll						innorat	portiunea de transect intre sosea si capcana 1 este inundata
2016.03.14	10:00:00	49	mt					0.5	a plouat noaptea (4-5)	metamorfi Ll						innorat	portiunea de transect intre sosea si capcana 1 este inundata
2016.03.14	10:00:00	50	mt					0.5	a plouat noaptea (4-5)	metamorfi Ll						innorat	portiunea de transect intre sosea si capcana 1 este inundata
2016.03.14	10:00:00	51	mt					0.5	a plouat noaptea (4-5)	metamorfi Ll						innorat	portiunea de transect intre sosea si capcana 1 este inundata
2016.03.14	10:00:00	52	mt					0.5	a plouat noaptea (4-5)	metamorfi Ll						innorat	portiunea de transect intre sosea si capcana 1 este inundata
2016.03.14	10:00:00	53	mt					0.5	a plouat noaptea (4-5)	metamorfi Ll						innorat	portiunea de transect intre sosea si capcana 1 este inundata
2016.03.14	10:00:00	54	mt					0.5	a plouat noaptea (4-5)	metamorfi Ll						innorat	portiunea de transect intre sosea si capcana 1 este inundata
2016.03.14	10:00:00	55	mt					0.5	a plouat noaptea (4-5)	metamorfi Ll						innorat	portiunea de transect intre sosea si capcana 1 este inundata
2016.03.14	10:00:00	56	mt					0.5	a plouat noaptea (4-5)	metamorfi Ll						innorat	portiunea de transect intre sosea si capcana 1 este inundata
2016.03.14	10:00:00	57	mt					0.5	a plouat noaptea (4-5)	metamorfi Ll						innorat	portiunea de transect intre sosea si capcana 1 este inundata
2016.03.14	10:00:00	58	mt					0.5	a plouat noaptea (4-5)	metamorfi Ll						innorat	portiunea de transect intre sosea si capcana 1 este inundata
2016.03.14	10:00:00	59	mt					0.5	a plouat noaptea (4-5)	metamorfi Ll						innorat	portiunea de transect intre sosea si capcana 1 este inundata
2016.03.14	10:00:00	60	mt					0.5	a plouat noaptea (4-5)	metamorfi Ll						innorat	portiunea de transect intre sosea si capcana 1 este inundata
2016.03.14	10:00:00	61	mt					0.5	a plouat noaptea (4-5)	metamorfi Ll						innorat	portiunea de transect intre sosea si capcana 1 este inundata
2016.03.14	10:00:00	62	mt					0.5	a plouat noaptea (4-5)	metamorfi Ll						innorat	portiunea de transect intre sosea si capcana 1 este inundata
2016.03.14	10:00:00	63	mt					0.5	a plouat noaptea (4-5)	metamorfi Ll						innorat	portiunea de transect intre sosea si capcana 1 este inundata
2016.03.14	10:00:00	64	mt					0.5	a plouat noaptea (4-5)	metamorfi Ll						innorat	portiunea de transect intre sosea si capcana 1 este inundata
2016.03.14	10:00:00	65	mt					0.5	a plouat noaptea (4-5)	metamorfi Ll						innorat	portiunea de transect intre sosea si capcana 1 este inundata
2016.03.14	10:00:00	66	mt					0.5	a plouat noaptea (4-5)	metamorfi Ll						innorat	portiunea de transect intre sosea si capcana 1 este inundata
2016.03.14	10:00:00	67	mt					0.5	a plouat noaptea (4-5)	metamorfi Ll						innorat	portiunea de transect intre sosea si capcana 1 este inundata
2016.03.14	10:00:00	68	mt					0.5	a plouat noaptea (4-5)	metamorfi Ll						innorat	portiunea de transect intre sosea si capcana 1 este inundata
2016.03.14	10:00:00	69	mt					0.5	a plouat noaptea (4-5)	metamorfi Ll						innorat	portiunea de transect intre sosea si capcana 1 este inundata
2016.03.14	10:00:00	70	mt					0.5	a plouat noaptea (4-5)	metamorfi Ll						innorat	portiunea de transect intre sosea si capcana 1 este inundata
2016.03.14	10:00:00	71	mt					0.5	a plouat noaptea (4-5)	metamorfi Ll						innorat	portiunea de transect intre sosea si capcana 1 este inundata
2016.03.14	10:00:00	72	mt					0.5	a plouat noaptea (4-5)	metamorfi Ll						innorat	portiunea de transect intre sosea si capcana 1 este inundata
2016.03.14	10:00:00	73	mt					0.5	a plouat noaptea (4-5)	metamorfi Ll						innorat	portiunea de transect intre sosea si capcana 1 este inundata
2016.03.14	10:00:00	74	mt					0.5	a plouat noaptea (4-5)	metamorfi Ll						innorat	portiunea de transect intre sosea si capcana 1 este inundata
2016.03.14	10:00:00	75	mt					0.5	a plouat noaptea (4-5)	metamorfi Ll						innorat	portiunea de transect intre sosea si capcana 1 este inundata
2016.03.14	10:00:00	76	mt					0.5	a plouat noaptea (4-5)	metamorfi Ll						innorat	portiunea de transect intre sosea si capcana 1 este inundata
2016.03.14	10:00:00	77	mt					0.5	a plouat noaptea (4-5)	metamorfi Ll						innorat	portiunea de transect intre sosea si capcana 1 este inundata
2016.03.14	10:00:00	78	mt					0.5	a plouat noaptea (4-5)	metamorfi Ll						innorat	portiunea de transect intre sosea si capcana 1 este inundata
2016.03.14	10:00:00	79	mt					0.5	a plouat noaptea (4-5)	metamorfi Ll						innorat	portiunea de transect intre sosea si capcana 1 este inundata
2016.03.14	10:00:00	80	mt					0.5	a plouat noaptea (4-5)	metamorfi Ll						innorat	portiunea de transect intre sosea si capcana 1 este inundata
2016.03.14	10:00:00	81	mt					0.5	a plouat noaptea (4-5)	metamorfi Ll						innorat	portiunea de transect intre sosea si capcana 1 este inundata
2016.03.14	10:00:00	82	mt					0.5	a plouat noaptea (4-5)	metamorfi Ll						innorat	portiunea de transect intre sosea si capcana 1 este inundata
2016.03.14	10:00:00	83	mt					0.5	a plouat noaptea (4-5)	metamorfi Ll						innorat	portiunea de transect intre sosea si capcana 1 este inundata
2016.03.14	10:00:00	84	mt					0.5	a plouat noaptea (4-5)	metamorfi Ll						innorat	portiunea de transect intre sosea si capcana 1 este inundata
2016.03.14	10:00:00	85	mt					0.5	a plouat noaptea (4-5)	metamorfi Ll						innorat	portiunea de transect intre sosea si capcana 1 este inundata
2016.03.14	10:00:00	86	mt					0.5	a plouat noaptea (4-5)	metamorfi Ll						innorat	portiunea de transect intre sosea si capcana 1 este inundata
2016.03.14	10:00:00	87	mt					0.5	a plouat noaptea (4-5)	metamorfi Ll						innorat	portiunea de transect intre sosea si capcana 1 este inundata
2016.03.14	10:00:00	88	mt					0.5	a plouat noaptea (4-5)	metamorfi Ll						innorat	portiunea de transect intre sosea si capcana 1 este inundata
2016.03.14	10:00:00	89	mt					0.5	a plouat noaptea (4-5)	metamorfi Ll						innorat	portiunea de transect intre sosea si capcana 1 este inundata
2016.03.14	10:00:00	90	mt					0.5	a plouat noaptea (4-5)	metamorfi Ll						innorat	portiunea de transect intre sosea si capcana 1 este inundata
2016.03.14	10:00:00	91	mt					0.5	a plouat noaptea (4-5)	metamorfi Ll						innorat	portiunea de transect intre sosea si capcana 1 este inundata
2016.03.14	10:00:00	92	mt					0.5	a plouat noaptea (4-5)	metamorfi Ll						innorat	portiunea de transect intre sosea si capcana 1 este inundata
2016.03.14	10:00:00	93	mt					0.5	a plouat noaptea (4-5)	metamorfi Ll						innorat	portiunea de transect intre sosea si capcana 1 este inundata
2016.03.14	10:00:00	94	mt					0.5	a plouat noaptea (4-5)	metamorfi Ll						innorat	portiunea de transect intre sosea si capcana 1 este inundata
2016.03.14	10:00:00	95	mt					0.5	a plouat noaptea (4-5)	metamorfi Ll						innorat	portiunea de transect intre sosea si capcana 1 este inundata
2016.03.14	10:00:00	96	mt					0.5	a plouat noaptea (4-5)	metamorfi Ll						innorat	portiunea de transect intre sosea si capcana 1 este inundata
2016.03.14	10:00:00	97	mt					0.5	a plouat noaptea (4-5)	metamorfi Ll						innorat	portiunea de transect intre sosea si capcana 1 este inundata
2016.03.14	10:00:00	98	mt					0.5	a plouat noaptea (4-5)	metamorfi Ll						innorat	portiunea de transect intre sosea si capcana 1 este inundata
2016.03.14	10:00:00	99	mt					0.5	a plouat noaptea (4-5)	metamorfi Ll						innorat	portiunea de transect intre sosea si capcana 1 este inundata
2016.03.14	10:00:00	100	mt					0.5	a plouat noaptea (4-5)	metamorfi Ll						innorat	portiunea de transect intre sosea si capcana 1 este inundata
2016.03.14	10:00:00	101	mt					0.5	a plouat noaptea (4-5)	metamorfi Ll						innorat	portiunea de transect intre sosea si capcana 1 este inundata
2016.03.14	10:00:00	102	mt					0.5	a plouat noaptea (4-5)	metamorfi Ll						innorat	portiunea de transect intre sosea si capcana 1 este inundata
2016.03.14	10:00:00	103	mt					0.5	a plouat noaptea (4-5)	metamorfi Ll						innorat	portiunea de transect intre sosea si capcana 1 este inundata
2016.03.14	10:00:00	104	mt					0.5	a plouat noaptea (4-5)	metamorfi Ll						innorat	portiunea de transect intre sosea si capcana 1 este inundata
2016.03.14	10:00:00	105	mt					0.5	a plouat noaptea (4-5)	metamorfi Ll						innorat	portiunea de transect intre sosea si capcana 1 este inundata
2016.03.14	10:00:00	106	mt					0.5	a plouat noaptea (4-5)	metamorfi Ll						innorat	portiunea de transect intre sosea si capcana 1 este inundata
2016.03.14	10:00:00	107	mt					0.5	a plouat noaptea (4-5)	metamorfi Ll						innorat	portiunea de transect intre sosea si capcana 1 este inundata
2016.03.14	10:00:00	108	mt					0.5	a plouat noaptea (4-5)	metamorfi Ll						innorat	portiunea de transect intre sosea si capcana 1 este inundata
2016.03.14	10:00:00	109	mt					0.5	a plouat noaptea (4-5)	metamorfi Ll						innorat	portiunea de transect intre sosea si capcana 1 este inundata
2016.03.14	10:00:00	110	mt					0.5	a plouat noaptea (4-5)	metamorfi Ll						innorat	portiunea de transect intre sosea si capcana 1 este inundata
2016.03.14	10:00:00	111	mt					0.5	a plouat noaptea (4-5)	metamorfi Ll						innorat	portiunea de transect intre sosea si capcana 1 este inundata
2016.03.14	10:00:00	112	mt					0.5	a plouat noaptea (4-5)	metamorfi Ll						innorat	portiunea de transect intre sosea si capcana 1 este inundata
2016.03.14	10:00:00	113	mt					0.5	a plouat noaptea (4-5)	metamorfi Ll						innorat	portiunea de transect intre sosea si capcana 1 este inundata
2016.03.14	10:00:00	114	mt					0.5	a plouat noaptea (4-5)	metamorfi Ll						innorat	portiunea de transect intre sosea si capcana 1 este inundata
2016.03.14	10:00:00	115	mt					0.5	a plouat noaptea (4-5)	metamorfi Ll						innorat	portiunea de transect intre sosea si capcana 1 este inundata
2016.03.14	10:00:00	116	mt					0.5	a plouat noaptea (4-5)	metamorfi Ll						innorat	portiunea de transect intre sosea si capcana 1 este inundata
2016.03.14	10:00:00	117	mt					0.5	a plouat noaptea (4-5)	metamorfi Ll						innorat	portiunea de transect intre sosea si capcana 1 este inundata
2016.03.14	10:00:00	118	mt					0.5	a plouat noaptea (4-5)	metamorfi Ll						innorat	portiunea de transect intre sosea si capcana 1 este inundata
2016.03.14	10:00:00	119	mt					0.5	a plouat noaptea (4-5)	metamorfi Ll						innorat	portiunea de transect intre sosea si capcana 1 este inundata
2016.03.14	10:00:00	120	mt					0.5	a plouat noaptea (4-5)	metamorfi Ll						innorat	portiunea de transect intre sosea si capcana 1 este inundata
2016.03.14	10:00:00	121	mt					0.5	a plouat noaptea (4-5)	metamorfi Ll						innorat	portiunea de transect intre sosea si capcana 1 este inundata
2016.03.14	10:00:00	122	mt					0.5	a plouat noaptea (4-5)	metamorfi Ll						innorat	portiunea de transect intre sosea si capcana 1 este inundata
2016.03.14	10:00:00	123	mt					0.5	a plouat noaptea (4-5)	metamorfi Ll						innorat	portiunea de transect intre sosea si capcana 1 este inundata
2016.03.14	10:00:00	124	mt					0.5	a plouat noaptea (4-5)	metamorfi Ll						innorat	portiunea de transect intre sosea si capcana 1 este inundata
2016.03.14	10:00:00	125	mt					0.5	a plouat noaptea (4-5)	metamorfi Ll						innorat	portiunea de transect intre sosea si capcana 1 este inundata
2016.03.14	10:00:00	126	mt					0.5	a plouat noaptea (4-5)	metamorfi Ll						innorat	portiunea de transect intre sosea si capcana 1 este inundata
2016.03.14	10:00:00	127	mt					0.5	a plouat noaptea (4-5)	metamorfi Ll						innorat	portiunea de transect intre sosea si capcana 1 este inundata
2016.03.14	10:00:00	128	mt					0.5	a plouat noaptea (4-5)	metamorfi Ll						innorat	portiunea de transect intre sosea si capcana 1 este inundata
2016.03.14	10:00:00	129	mt					0.5	a plouat noaptea (4-5)	metamorfi Ll						innorat	portiunea de transect intre sosea si capcana 1 este inundata
2016.03.14	10:00:00	130	mt					0.5	a plouat noaptea (4-5)	metamorfi Ll						innorat	portiunea de transect intre sosea si capcana 1 este inundata
2016.03.14	10:00:00	131	mt					0.5	a plouat noaptea (4-5)	metamorfi Ll						innorat	portiunea de transect intre sosea si capcana 1 este inundata
2016.03.14	10:00:00	132	mt					0.5	a plouat noaptea (4-5)	metamorfi Ll						innorat	portiunea de transect intre sosea si capcana 1 este inundata
2016.03.14	10:00:00	133	mt					0.5	a plouat noaptea (4-5)	metamorfi Ll						innorat	portiunea de transect intre sosea si capcana 1 este inundata
2016.03.14	10:00:00	134	mt					0.5	a plouat noaptea (4-5)	metamorfi Ll						innorat	portiunea de transect intre sosea si capcana 1 este inundata
2016.03.14	10:00:00	135	mt					0.5	a plouat noaptea (4-5)	metamorfi Ll						innorat	portiunea de transect intre sosea si capcana 1 este inundata
2016.03.14	10:00:00	136	mt					0.5	a plouat noaptea (4-5)	metamorfi Ll						innorat	portiunea de transect intre sosea si capcana 1 este inundata
2016.03.14	10:00:00	137	mt					0.5	a plouat noaptea (4-5)	metamorfi Ll						innorat	portiunea de transect intre sosea si capcana 1 este inundata
2016.03.14	10:00:00	138	mt					0.5	a plouat noaptea (4-5)	metamorfi Ll						innorat	portiunea de transect intre sosea si capcana 1 este inundata
2016.03.14	10:00:00	139	mt					0.5	a plouat noaptea (4-5)	metamorfi Ll						innorat	portiunea de transect intre sosea si capcana 1 este inundata
2016.03.14	10:00:00	140	mt					0.5	a plouat noaptea (4-5)	metamorfi Ll						innorat	portiunea de transect intre sosea si capcana 1 este inundata
2016.03.14	10:00:00	141	mt					0.5	a plouat noaptea (4-5)	metamorfi Ll						innorat	portiunea de transect intre sosea si capcana 1 este inundata
2016.03.14	10:00:00	142	mt					0.5	a plouat noaptea (4-5)	metamorfi Ll						innorat	portiunea de transect intre sosea si capcana 1 este inundata
2016.03.14	10:00:00	143	mt					0.5	a plouat noaptea (4-5)	metamorfi Ll						innorat	portiunea de transect intre sosea si capcana 1 este inundata
2016.03.14	10:00:00	144	mt					0.5	a plouat noaptea (4-5)	metamorfi Ll						innorat	portiunea de transect intre sosea si capcana 1 este inundata
2016.03.14	10:00:00	145	mt					0.5	a plouat noaptea (4-5)	metamorfi Ll						innorat	portiunea de transect intre sosea si capcana 1 este inundata
2016.03.14	10:00:00	146	mt					0.5	a plouat noaptea (4-5)	metamorfi Ll						innorat	portiunea de transect intre sosea si capcana 1 este inundata
2016.03.14	10:00:00	147	mt					0.5	a plouat noaptea (4-5)	metamorfi Ll						innorat	portiunea de transect intre sosea si capcana 1 este inundata
2016.03.14	10:00:00	148	mt					0.5	a plouat noaptea (4-5)	metamorfi Ll						innorat	portiunea de transect intre sosea si capcana 1 este inundata
2016.03.14	10:00:00	149	mt					0.5	a plouat noaptea (4-5)	metamorfi Ll						innorat	portiunea de transect intre sosea si capcana 1 este inundata
2016.03.14	10:00:00	150	mt					0.5	a plouat noaptea (4-5)	metamorfi Ll						innorat	portiunea de transect intre sosea si capcana 1 este inundata
2016.03.14	10:00:00	151	mt					0.5	a plouat noaptea (4-5)	metamorfi Ll						innorat	portiunea de transect intre sosea si capcana 1 este inundata
2016.03.14	10:00:00	152	mt					0.5	a plouat noaptea (4-5)	metamorfi Ll						innorat	portiunea de transect intre sosea si capcana 1 este inundata
2016.03.14	10:00:00	153	mt					0.5	a plouat noaptea (4-5)	metamorfi Ll						innorat	portiunea de transect intre sosea si capcana 1 este inundata
2016.03.14	10:00:00	154	mt					0.5	a plouat noaptea (4-5)	metamorfi Ll						innorat	portiunea de transect intre sosea si capcana 1 este inundata
2016.03.14	10:00:00	155	mt					0.5	a plouat noaptea (4-5)	metamorfi Ll						innorat	portiunea de transect intre sosea si capcana 1 este inundata
2016.03.14	10:00:00	156	mt					0.5	a plouat noaptea (4-5)	metamorfi Ll						innorat	portiunea de transect intre sosea si capcana 1 este inundata
2016.03.14	10:00:00	157	mt					0.5	a plouat noaptea (4-5)	metamorfi Ll						innorat	portiunea de transect intre sosea si capcana 1 este inundata
2016.03.14	10:00:00	158	mt					0.5	a plouat noaptea (4-5)	metamorfi Ll						innorat	portiunea de transect intre sosea si capcana 1 este inundata
2016.03.14	10:00:00	159	mt					0.5	a plouat noaptea (4-5)	metamorfi Ll						innorat	portiunea de transect intre sosea si capcana 1 este inundata
2016.03.14	10:00:00	160	mt					0.5	a plouat noaptea (4-5)	metamorfi Ll						innorat	portiunea de transect intre sosea si capcana 1 este inundata
2016.03.14	10:00:00	161	mt					0.5	a plouat noaptea (4-5)	metamorfi Ll						innorat	portiunea de transect intre sosea si capcana 1 este inundata
2016.03.14	10:00:00	162	mt					0.5	a plouat noaptea (4-5)	metamorfi Ll						innorat	portiunea de transect intre sosea si capcana 1 este inundata
2016.03.14	10:00:00	163	mt					0.5	a plouat noaptea (4-5)	metamorfi Ll						innorat	portiunea de transect intre sosea si capcana 1 este inundata
2016.03.14	10:00:00	164	mt					0.5	a plouat noaptea (4-5)	metamorfi Ll						innorat	portiunea de transect intre sosea si capcana 1 este inundata
2016.03.14	10:00:00	165	mt					0.5	a plouat noaptea (4-5)	metamorfi Ll						innorat	portiunea de transect intre sosea si capcana 1 este inundata
2016.03.14	10:00:00	166	mt					0.5	a plouat noaptea (4-5)	metamorfi Ll						innorat	portiunea de transect intre sosea si capcana 1 este inundata
2016.03.14	10:00:00	167	mt					0.5	a plouat noaptea (4-5)	metamorfi Ll						innorat	portiunea de transect intre sosea si capcana 1 este inundata
2016.03.14	10:00:00	168	mt					0.5	a plouat noaptea (4-5)	metamorfi Ll						innorat	portiunea de transect intre sosea si capcana 1 este inundata
2016.03.14	10:00:00	169	mt					0.5	a plouat noaptea (4-5)	metamorfi Ll						innorat	portiunea de transect intre sosea si capcana 1 este inundata
2016.03.14	10:00:00	170	mt					0.5	a plouat noaptea (4-5)	metamorfi Ll						innorat	portiunea de transect intre sosea si capcana 1 este inundata
2016.03.14	10:00:00	171	mt					0.5	a plouat noaptea (4-5)	metamorfi Ll						innorat	portiunea de transect intre sosea si capcana 1 este inundata
2016.03.14	10:00:00	172	mt					0.5	a plouat noaptea (4-5)	metamorfi Ll						innorat	portiunea de transect intre sosea si capcana 1 este inundata
2016.03.14	10:00:00	173	mt					0.5	a plouat noaptea (4-5)	metamorfi Ll						innorat	portiunea de transect intre sosea si capcana 1 este inundata
2016.03.14	10:00:00	174	mt					0.5	a plouat noaptea (4-5)	metamorfi Ll						innorat	portiunea de transect intre sosea si capcana 1 este inundata
2016.03.14	10:00:00	175	mt					0.5	a plouat noaptea (4-5)	metamorfi Ll						innorat	portiunea de transect intre sosea si capcana 1 este inundata
2016.03.14	10:00:00	176	mt					0.5	a plouat noaptea (4-5)	metamorfi Ll						innorat	portiunea de transect intre sosea si capcana 1 este inundata
2016.03.14	10:00:00	177	mt					0.5	a plouat noaptea (4-5)	metamorfi Ll						innorat	portiunea de transect intre sosea si capcana 1 este inundata
2016.03.14	10:00:00	178	mt					0.5	a plouat noaptea (4-5)	metamorfi Ll						innorat	portiunea de transect intre sosea si capcana 1 este inundata
2016.03.14	10:00:00	179	mt					0.5	a plouat noaptea (4-5)	metamorfi Ll						innorat	portiunea de transect intre sosea si capcana 1 este inundata
2016.03.14	10:00:00	180	mt					0.5	a plouat noaptea (4-5)	metamorfi Ll						innorat	portiunea de transect intre sosea si capcana 1 este inundata
2016.03.14	10:00:00	181	mt					0.5	a plouat noaptea (4-5)	metamorfi Ll						innorat	portiunea de transect intre sosea si capcana 1 este inundata
2016.03.14	10:00:00	182	mt					0.5	a plouat noaptea (4-5)	metamorfi Ll						innorat	portiunea de transect intre sosea si capcana 1 este inundata
2016.03.14	10:00:00	183	mt					0.5	a plouat noaptea (4-5)	metamorfi Ll						innorat	portiunea de transect intre sosea si capcana 1 este inundata
2016.03.14	10:00:00	184	mt					0.5	a plouat noaptea (4-5)	metamorfi Ll						innorat	portiunea de transect intre sosea si capcana 1 este inundata
2016.03.14	10:00:00	185	mt					0.5	a plouat noaptea (4-5)	metamorfi Ll						innorat	portiunea de transect intre sosea si capcana 1 este inundata
2016.03.14	10:00:00	186	mt					0.5	a plouat noaptea (4-5)	metamorfi Ll						innorat	portiunea de transect intre sosea si capcana 1 este inundata
2016.03.14	10:00:00	187	mt					0.5	a plouat noaptea (4-5)	metamorfi Ll						innorat	portiunea de transect intre sosea si capcana 1 este inundata
2016.03.14	10:00:00	188	mt					0.5	a plouat noaptea (4-5)	metamorfi Ll						innorat	portiunea de transect intre sosea si capcana 1 este inundata
2016.03.14	10:00:00	189	mt					0.5	a plouat noaptea (4-5)	metamorfi Ll						innorat	portiunea de transect intre sosea si capcana 1 este inundata
2016.03.14	10:00:00	190	mt					0.5	a plouat noaptea (4-5)	metamorfi Ll						innorat	portiunea de transect intre sosea si capcana 1 este inundata
2016.03.14	10:00:00	191	mt					0.5	a plouat noaptea (4-5)	metamorfi Ll						innorat	portiunea de transect intre sosea si capcana 1 este inundata
2016.03.14	10:00:00	192	mt					0.5	a plouat noaptea (4-5)	metamorfi Ll						innorat	portiunea de transect intre sosea si capcana 1 este inundata
2016.03.14	10:00:00	193	mt					0.5	a plouat noaptea (4-5)	metamorfi Ll						innorat	portiunea de transect intre sosea si capcana 1 este inundata
2016.03.14	10:00:00	194	mt					0.5	a plouat noaptea (4-5)	metamorfi Ll						innorat	portiunea de transect intre sosea si capcana 1 este inundata
2016.03.14	10:00:00	195	mt					0.5	a plouat noaptea (4-5)	metamorfi Ll						innorat	portiunea de transect intre sosea si capcana 1 este inundata
2016.03.14	10:00:00	196	mt					0.5	a plouat noaptea (4-5)	metamorfi Ll						innorat	portiunea de transect intre sosea si capcana 1 este inundata
2016.03.14	10:00:00	197	mt					0.5	a plouat noaptea (4-5)	metamorfi Ll						innorat	portiunea de transect intre sosea si capcana 1 este inundata
2016.03.14	10:00:00	198	mt					0.5	a plouat noaptea (4-5)	metamorfi Ll						innorat	portiunea de transect intre sosea si capcana 1 este inundata
2016.03.14	10:00:00	199	mt					0.5	a plouat noaptea (4-5)	metamorfi Ll						innorat	portiunea de transect intre sosea si capcana 1 este inundata
2016.03.14	10:00:00	200	mt					0.5	a plouat noaptea (4-5)	metamorfi Ll						innorat	portiunea de transect intre sosea si capcana 1 este inundata
2016.03.14	10:00:00	201	mt					0.5	a plouat noaptea (4-5)	metamorfi Ll						innorat	portiunea de transect intre sosea si capcana 1 este inundata
2016.03.14	10:00:00	202	mt					0.5	a plouat noaptea (4-5)	metamorfi Ll						innorat	portiunea de transect intre sosea si capcana 1 este inundata
2016.03.14	10:00:00	203	mt					0.5	a plouat noaptea (4-5)	metamorfi Ll						innorat	portiunea de transect intre sosea si capcana 1 este inundata
2016.03.14	10:00:00	204	mt					0.5	a plouat noaptea (4-5)	metamorfi Ll						innorat	portiunea de transect intre sosea si capcana 1 este inundata
2016.03.14	10:00:00	205	mt					0.5	a plouat noaptea (4-5)	metamorfi Ll						innorat	portiunea de transect intre sosea si capcana 1 este inundata
2016.03.14	10:00:00	206	mt					0.5	a plouat noaptea (4-5)	metamorfi Ll						innorat	portiunea de transect intre sosea si capcana 1 este inundata
2016.03.14	10:00:00	207	mt					0.5	a plouat noaptea (4-5)	metamorfi Ll						innorat	portiunea de transect intre sosea si capcana 1 este inundata
2016.03.14	10:00:00	208	mt					0.5	a plouat noaptea (4-5)	metamorfi Ll						innorat	portiunea de transect intre sosea si capcana 1 este inundata
2016.03.14	10:00:00	209	mt					0.5	a plouat noaptea (4-5)	metamorfi Ll						innorat	portiunea de transect intre sosea si capcana 1 este inundata
2016.03.14	10:00:00	210	mt					0.5	a plouat noaptea (4-5)	metamorfi Ll						innorat	portiunea de transect intre sosea si capcana 1 este inundata
2016.03.14	10:00:00	211	mt					0.5	a plouat noaptea (4-5)	metamorfi Ll						innorat	portiunea de transect intre sosea si capcana 1 este inundata
2016.03.14	10:00:00	212	mt					0.5	a plouat noaptea (4-5)	metamorfi Ll						innorat	portiunea de transect intre sosea si capcana 1 este inundata
2016.03.14	10:00:00	213	mt					0.5	a plouat noaptea (4-5)	metamorfi Ll						innorat	portiunea de transect intre sosea si capcana 1 este inundata
2016.03.14	10:00:00	214	mt					0.5	a plouat noaptea (4-5)	metamorfi Ll						innorat	portiunea de transect intre sosea si capcana 1 este inundata
2016.03.14	10:00:00	215	mt					0.5	a plouat noaptea (4-5)	metamorfi Ll						innorat	portiunea de transect intre sosea si capcana 1 este inundata
2016.03.14	10:00:00	216	mt					0.5	a plouat noaptea (4-5)	metamorfi Ll						innorat	portiunea de transect intre sosea si capcana 1 este inundata
2016.03.14	10:00:00	217	mt					0.5	a plouat noaptea (4-5)	metamorfi Ll						innorat	portiunea de transect intre sosea si capcana 1 este inundata
2016.03.14	10:00:00	218	mt					0.5	a plouat noaptea (4-5)	metamorfi Ll						innorat	portiunea de transect intre sosea si capcana 1 este inundata
2016.03.14	10:00:00	219	mt					0.5	a plouat noaptea (4-5)	metamorfi Ll						innorat	portiunea de transect intre sosea si capcana 1 este inundata
2016.03.14	10:00:00	220	mt					0.5	a plouat noaptea (4-5)	metamorfi Ll						innorat	portiunea de transect intre sosea si capcana 1 este inundata
2016.03.14	10:00:00	221	mt					0.5	a plouat noaptea (4-5)	metamorfi Ll						innorat	portiunea de transect intre sosea si capcana 1 este inundata
2016.03.14	10:00:00	222	mt					0.5	a plouat noaptea (4-5)	metamorfi Ll						innorat	portiunea de transect intre sosea si capcana 1 este inundata
2016.03.14	10:00:00	223	mt					0.5	a plouat noaptea (4-5)	metamorfi Ll						innorat	portiunea de transect intre sosea si capcana 1 este inundata
2016.03.14	10:00:00	224	mt					0.5	a plouat noaptea (4-5)	metamorfi Ll						innorat	portiunea de transect intre sosea si capcana 1 este inundata
2016.03.14	10:00:00	225	mt					0.5	a plouat noaptea (4-5)	metamorfi Ll						innorat	portiunea de transect intre sosea si capcana 1 este inundata
2016.03.14	10:00:00	226	mt					0.5	a plouat noaptea (4-5)	metamorfi Ll						innorat	portiunea de transect intre sosea si capcana 1 este inundata
2016.03.14	10:00:00	227	mt					0.5	a plouat noaptea (4-5)	metamorfi Ll						innorat	portiunea de transect intre sosea si capcana 1 este inundata
2016.03.14	10:00:00	228	mt					0.5	a plouat noaptea (4-5)	metamorfi Ll						innorat	portiunea de transect intre sosea si capcana 1 este inundata
2016.03.14	10:00:00	229	mt					0.5	a plouat noaptea (4-5)	metamorfi Ll						innorat	portiunea de transect intre sosea si capcana 1 este inundata
2016.03.14	10:00:00	230	mt					0.5	a plouat noaptea (4-5)	metamorfi Ll						innorat	portiunea de transect intre sosea si capcana 1 este inundata
2016.03.14	10:00:00	231	mt					0.5	a plouat noaptea (4-5)	metamorfi Ll						innorat	portiunea de transect intre sosea si capcana 1 este inundata
2016.03.14	10:00:00	232	mt					0.5	a plouat noaptea (4-5)	metamorfi Ll						innorat	portiunea de transect intre sosea si capcana 1 este inundata
2016.03.14	10:00:00	233	mt					0.5	a plouat noaptea (4-5)	metamorfi Ll						innorat	portiunea de transect intre sosea si capcana 1 este inundata
2016.03.14	10:00:00	234	mt					0.5	a plouat noaptea (4-5)	metamorfi Ll						innorat	portiunea de transect intre sosea si capcana 1 este inundata
2016.03.14	10:00:00	235	mt					0.5	a plouat noaptea (4-5)	metamorfi Ll						innorat	portiunea de transect intre sosea si capcana 1 este inundata
2016.03.14	10:00:00	236	mt					0.5	a plouat noaptea (4-5)	metamorfi Ll						innorat	portiunea de transect intre sosea si capcana 1 este inundata
2016.03.14	10:00:00	237	mt					0.5	a plouat noaptea (4-5)	metamorfi Ll						innorat	portiunea de transect intre sosea si capcana 1 este inundata
2016.03.14	10:00:00	238	mt					0.5	a plouat noaptea (4-5)	metamorfi Ll						innorat	portiunea de transect intre sosea si capcana 1 este inundata
2016.03.14	10:00:00	239	mt					0.5	a plouat noaptea (4-5)	metamorfi Ll						innorat	portiunea de transect intre sosea si capcana 1 este inundata
2016.03.14	10:00:00	240	mt					0.5	a plouat noaptea (4-5)	metamorfi Ll						innorat	portiunea de transect intre sosea si capcana 1 este inundata
2016.03.14	10:00:00	241	mt					0.5	a plouat noaptea (4-5)	metamorfi Ll						innorat	portiunea de transect intre sosea si capcana 1 este inundata
2016.03.14	10:00:00	242	mt					0.5	a plouat noaptea (4-5)	metamorfi Ll						innorat	portiunea de transect intre sosea si capcana 1 este inundata
2016.03.14	10:00:00	243	mt					0.5	a plouat noaptea (4-5)	metamorfi Ll						innorat	portiunea de transect intre sosea si capcana 1 este inundata
2016.03.14	10:00:00	244	mt					0.5	a plouat noaptea (4-5)	metamorfi Ll						innorat	portiunea de transect intre sosea si capcana 1 este inundata
2016.03.14	10:00:00	245	mt					0.5	a plouat noaptea (4-5)	metamorfi Ll						innorat	portiunea de transect intre sosea si capcana 1 este inundata
2016.03.14	10:00:00	246	mt					0.5	a plouat noaptea (4-5)	metamorfi Ll						innorat	portiunea de transect intre sosea si capcana 1 este inundata
2016.03.14	10:00:00	247	mt					0.5	a plouat noaptea (4-5)	metamorfi Ll						innorat	portiunea de transect intre sosea si capcana 1 este inundata
2016.03.14	10:00:00	248	mt					0.5	a plouat noaptea (4-5)	metamorfi Ll						innorat	portiunea de transect intre sosea si capcana 1 este inundata
2016.03.14	10:00:00	249	mt					0.5	a plouat noaptea (4-5)	metamorfi Ll						innorat	portiunea de transect intre sosea si capcana 1 este inundata
2016.03.14	10:00:00	250	mt					0.5	a plouat noaptea (4-5)	metamorfi Ll						innorat	portiunea de transect intre sosea si capcana 1 este inundata
2016.03.14	10:00:00	251	mt					0.5	a plouat noaptea (4-5)	metamorfi Ll						innorat	portiunea de transect intre sosea si capcana 1 este inundata
2016.03.14	10:00:00	252	mt					0.5	a plouat noaptea (4-5)	metamorfi Ll						innorat	portiunea de transect intre sosea si capcana 1 este inundata
2016.03.14	10:00:00	253	mt					0.5	a plouat noaptea (4-5)	metamorfi Ll						innorat	portiunea de transect intre sosea si capcana 1 este inundata
2016.03.14	10:00:00	254	mt					0.5	a plouat noaptea (4-5)	metamorfi Ll						innorat	portiunea de transect intre sosea si capcana 1 este inundata
2016.03.14	10:00:00	255	mt					0.5	a plouat noaptea (4-5)	metamorfi Ll						innorat	portiunea de transect intre sosea si capcana 1 este inundata
2016.03.14	10:00:00	256	mt					0.5	a plouat noaptea (4-5)	metamorfi Ll						innorat	portiunea de transect intre sosea si capcana 1 este inundata
2016.03.14	10:00:00	257	mt					0.5	a plouat noaptea (4-5)	metamorfi Ll						innorat	portiunea de transect intre sosea si capcana 1 este inundata
2016.03.14	10:00:00	258	mt					0.5	a plouat noaptea (4-5)	metamorfi Ll						innorat	portiunea de transect intre sosea si capcana 1 este inundata
2016.03.14	10:00:00	259	mt					0.5	a plouat noaptea (4-5)	metamorfi Ll						innorat	portiunea de transect intre sosea si capcana 1 este inundata
2016.03.14	10:00:00	260	mt					0.5	a plouat noaptea (4-5)	metamorfi Ll						innorat	portiunea de transect intre sosea si capcana 1 este inundata
2016.03.14	10:00:00	261	mt					0.5	a plouat noaptea (4-5)	metamorfi Ll						innorat	portiunea de transect intre sosea si capcana 1 este inundata
2016.03.14	10:00:00	262	mt					0.5	a plouat noaptea (4-5)	metamorfi Ll						innorat	portiunea de transect intre sosea si capcana 1 este inundata
2016.03.14	10:00:00	263	mt					0.5	a plouat noaptea (4-5)	metamorfi Ll						innorat	portiunea de transect intre sosea si capcana 1 este inundata
2016.03.14	10:00:00	264	mt					0.5	a plouat noaptea (4-5)	metamorfi Ll						innorat	portiunea de transect intre sosea si capcana 1 este inundata
2016.03.14	10:00:00	265	mt					0.5	a plouat noaptea (4-5)	metamorfi Ll						innorat	portiunea de transect intre sosea si capcana 1 este inundata
2016.03.14	10:00:00	266	mt					0.5	a plouat noaptea (4-5)	metamorfi Ll						innorat	portiunea de transect intre sosea si capcana 1 este inundata
2016.03.14	10:00:00	267	mt					0.5	a plouat noaptea (4-5)	metamorfi Ll						innorat	portiunea de transect intre sosea si capcana 1 este inundata
2016.03.14	10:00:00	268	mt					0.5	a plouat noaptea (4-5)	metamorfi Ll						innorat	portiunea de transect intre sosea si capcana 1 este inundata
2016.03.14	10:00:00	269	mt					0.5	a plouat noaptea (4-5)	metamorfi Ll						innorat	portiunea de transect intre sosea si capcana 1 este inundata
2016.03.14	10:00:00	270	mt					0.5	a plouat noaptea (4-5)	metamorfi Ll						innorat	portiunea de transect intre sosea si capcana 1 este inundata
2016.03.14	10:00:00	271	mt					0.5	a plouat noaptea (4-5)	metamorfi Ll						innorat	portiunea de transect intre sosea si capcana 1 este inundata
2016.03.14	10:00:00	272	mt					0.5	a plouat noaptea (4-5)	metamorfi Ll						innorat	portiunea de transect intre sosea si capcana 1 este inundata
2016.03.14	10:00:00	273	mt					0.5	a plouat noaptea (4-5)	metamorfi Ll						innorat	portiunea de transect intre sosea si capcana 1 este inundata
2016.03.14	10:00:00	274	mt					0.5	a plouat noaptea (4-5)	metamorfi Ll						innorat	portiunea de transect intre sosea si capcana 1 este inundata
2016.03.14	10:00:00	275	mt					0.5	a plouat noaptea (4-5)	metamorfi Ll						innorat	portiunea de transect intre sosea si capcana 1 este inundata
2016.03.14	10:00:00	276	mt					0.5	a plouat noaptea (4-5)	metamorfi Ll						innorat	portiunea de transect intre sosea si capcana 1 este inundata
2016.03.14	10:00:00	277	mt					0.5	a plouat noaptea (4-5)	metamorfi Ll						innorat	portiunea de transect intre sosea si capcana 1 este inundata
2016.03.14	10:00:00	278	mt					0.5	a plouat noaptea (4-5)	metamorfi Ll						innorat	portiunea de transect intre sosea si capcana 1 este inundata
2016.03.14	10:00:00	279	mt					0.5	a plouat noaptea (4-5)	metamorfi Ll						innorat	portiunea de transect intre sosea si capcana 1 este inundata
2016.03.14	10:00:00	280	mt					0.5	a plouat noaptea (4-5)	metamorfi Ll						innorat	portiunea de transect intre sosea si capcana 1 este inundata
2016.03.14	10:00:00	281	mt					0.5	a plouat noaptea (4-5)	metamorfi Ll						innorat	portiunea de transect intre sosea si capcana 1 este inundata
2016.03.14	10:00:00	282	mt					0.5	a plouat noaptea (4-5)	metamorfi Ll						innorat	portiunea de transect intre sosea si capcana 1 este inundata
2016.03.14	10:00:00	283	mt					0.5	a plouat noaptea (4-5)	metamorfi Ll						innorat	portiunea de transect intre sosea si capcana 1 este inundata
2016.03.14	10:00:00	284	mt					0.5	a plouat noaptea (4-5)	metamorfi Ll						innorat	portiunea de transect intre sosea si capcana 1 este inundata
2016.03.14	10:00:00	285	mt					0.5	a plouat noaptea (4-5)	metamorfi Ll						innorat	portiunea de transect intre sosea si capcana 1 este inundata
2016.03.14	10:00:00	286	mt					0.5	a plouat noaptea (4-5)	metamorfi Ll						innorat	portiunea de transect intre sosea si capcana 1 este inundata
2016.03.14	10:00:00	287	mt					0.5	a plouat noaptea (4-5)	metamorfi Ll						innorat	portiunea de transect intre sosea si capcana 1 este inundata
2016.03.14	10:00:00	288	mt					0.5	a plouat noaptea (4-5)	metamorfi Ll						innorat	portiunea de transect intre sosea si capcana 1 este inundata
2016.03.14	10:00:00	289	mt					0.5	a plouat noaptea (4-5)	metamorfi Ll						innorat	portiunea de transect intre sosea si capcana 1 este inundata
2016.03.14	10:00:00	290	mt					0.5	a plouat noaptea (4-5)	metamorfi Ll						innorat	portiunea de transect intre sosea si capcana 1 este inundata
2016.03.14	10:00:00	291	mt					0.5	a plouat noaptea (4-5)	metamorfi Ll						innorat	portiunea de transect intre sosea si capcana 1 este inundata
2016.03.14	10:00:00	292	mt					0.5	a plouat noaptea (4-5)	metamorfi Ll						innorat	portiunea de transect intre sosea si capcana 1 este inundata
2016.03.14	10:00:00	293	mt					0.5	a plouat noaptea (4-5)	metamorfi Ll						innorat	portiunea de transect intre sosea si capcana 1 este inundata
2016.03.14	10:00:00	294	mt					0.5	a plouat noaptea (4-5)	metamorfi Ll						innorat	portiunea de transect intre sosea si capcana 1 este inundata
2016.03.14	10:00:00	295	mt					0.5	a plouat noaptea (4-5)	metamorfi Ll						innorat	portiunea de transect intre sosea si capcana 1 este inundata
2016.03.14	10:00:00	296	mt					0.5	a plouat noaptea (4-5)	metamorfi Ll						innorat	portiunea de transect intre sosea si capcana 1 este inundata
2016.03.14	10:00:00	297	mt					0.5	a plouat noaptea (4-5)	metamorfi Ll						innorat	portiunea de transect intre sosea si capcana 1 este inundata
2016.03.14	10:00:00	298	mt					0.5	a plouat noaptea (4-5)	metamorfi Ll						innorat	portiunea de transect intre sosea si capcana 1 este inundata
2016.03.14	10:00:00	299	mt					0.5	a plouat noaptea (4-5)	metamorfi Ll						innorat	portiunea de transect intre sosea si capcana 1 este inundata
2016.03.14	10:00:00	300	mt					0.5	a plouat noaptea (4-5)	metamorfi Ll						innorat	portiunea de transect intre sosea si capcana 1 este inundata
2016.03.14	10:00:00	301	mt					0.5	a plouat noaptea (4-5)	metamorfi Ll						innorat	portiunea de transect intre sosea si capcana 1 este inundata
2016.03.14	10:00:00	302	mt					0.5	a plouat noaptea (4-5)	metamorfi Ll						innorat	portiunea de transect intre sosea si capcana 1 este inundata
2016.03.14	19:00:00	1	f	61.6	30.8	22.2	poteca	0.5	a plouat noaptea (4-5)	2 Ll, metamorfi Ll, canta Sq, Ep, Ll, Rm						innorat	portiunea de transect intre sosea si capcana 1 este inundata
2016.03.14	19:00:00	2	mt	27.2	13.3	1.9	ascuns in vegetatie	0.5	a plouat noaptea (4-5)	2 Ll, metamorfi Ll, canta Sq, Ep, Ll, Rm						innorat	portiunea de transect intre sosea si capcana 1 este inundata
2016.03.14	19:00:00	3	mt	27.4	14.8	1.8	ascuns in vegetatie	0.5	a plouat noaptea (4-5)	2 Ll, metamorfi Ll, canta Sq, Ep, Ll, Rm						innorat	portiunea de transect intre sosea si capcana 1 este inundata
2016.03.14	19:00:00	4	mt	26.9	15.4	1.8	ascuns in vegetatie	0.5	a plouat noaptea (4-5)	2 Ll, metamorfi Ll, canta Sq, Ep, Ll, Rm						innorat	portiunea de transect intre sosea si capcana 1 este inundata
2016.03.14	19:00:00	5	mt	25.5	12.7	1.7	ascuns in vegetatie	0.5	a plouat noaptea (4-5)	2 Ll, metamorfi Ll, canta Sq, Ep, Ll, Rm						innorat	portiunea de transect intre sosea si capcana 1 este inundata
2016.03.14	19:00:00	6	mt					0.5	a plouat noaptea (4-5)	2 Ll, metamorfi Ll, canta Sq, Ep, Ll, Rm						innorat	portiunea de transect intre sosea si capcana 1 este inundata
2016.03.14	19:00:00	7	mt	24.6	11.9	1.8	ascuns in vegetatie	0.5	a plouat noaptea (4-5)	2 Ll, metamorfi Ll, canta Sq, Ep, Ll, Rm						innorat	portiunea de transect intre sosea si capcana 1 este inundata
2016.03.14	19:00:00	8	mt					0.5	a plouat noaptea (4-5)	2 Ll, metamorfi Ll, canta Sq, Ep, Ll, Rm						innorat	portiunea de transect intre sosea si capcana 1 este inundata
2016.03.14	19:00:00	9	mt	25.2	13.3	1.7	ascuns in vegetatie	0.5	a plouat noaptea (4-5)	2 Ll, metamorfi Ll, canta Sq, Ep, Ll, Rm						innorat	portiunea de transect intre sosea si capcana 1 este inundata
2016.03.14	19:00:00	10	mt	26.1	13.5	1.6	ascuns in vegetatie	0.5	a plouat noaptea (4-5)	2 Ll, metamorfi Ll, canta Sq, Ep, Ll, Rm						innorat	portiunea de transect intre sosea si capcana 1 este inundata
2016.03.14	19:00:00	11	mt	26.2	13.4	1.8	ascuns in vegetatie	0.5	a plouat noaptea (4-5)	2 Ll, metamorfi Ll, canta Sq, Ep, Ll, Rm						innorat	portiunea de transect intre sosea si capcana 1 este inundata
2016.03.14	19:00:00	12	m	63.5	32	28.8	ascuns in vegetatie	0.5	a plouat noaptea (4-5)	2 Ll, metamorfi Ll, canta Sq, Ep, Ll, Rm						innorat	portiunea de transect intre sosea si capcana 1 este inundata
2016.03.14	19:00:00	13	mt	32.7	17	3.2	poteca	0.5	a plouat noaptea (4-5)	2 Ll, metamorfi Ll, canta Sq, Ep, Ll, Rm						innorat	portiunea de transect intre sosea si capcana 1 este inundata
2016.03.14	19:00:00	14	mt	31.1	15.7	3.1	ascuns in vegetatie	0.5	a plouat noaptea (4-5)	2 Ll, metamorfi Ll, canta Sq, Ep, Ll, Rm						innorat	portiunea de transect intre sosea si capcana 1 este inundata
2016.03.14	19:00:00	15	mt	32.8	17.9	3.8	ascuns in vegetatie	0.5	a plouat noaptea (4-5)	2 Ll, metamorfi Ll, canta Sq, Ep, Ll, Rm						innorat	portiunea de transect intre sosea si capcana 1 este inundata
2016.03.14	19:00:00	16	mt	31.5	16.9	3.3	ascuns in vegetatie	0.5	a plouat noaptea (4-5)	2 Ll, metamorfi Ll, canta Sq, Ep, Ll, Rm						innorat	portiunea de transect intre sosea si capcana 1 este inundata
2016.03.14	19:00:00	17	mt	32.9	15.8	3.5		0.5	a plouat noaptea (4-5)	2 Ll, metamorfi Ll, canta Sq, Ep, Ll, Rm						innorat	portiunea de transect intre sosea si capcana 1 este inundata
2016.03.14	19:00:00	18	mt	29.6	14.3	2.8		0.5	a plouat noaptea (4-5)	2 Ll, metamorfi Ll, canta Sq, Ep, Ll, Rm						innorat	portiunea de transect intre sosea si capcana 1 este inundata
2016.03.14	19:00:00	19	mt	33.2	17.8	3.8		0.5	a plouat noaptea (4-5)	2 Ll, metamorfi Ll, canta Sq, Ep, Ll, Rm						innorat	portiunea de transect intre sosea si capcana 1 este inundata
2016.03.14	19:00:00	20	mt	33.3	18.6	3.7		0.5	a plouat noaptea (4-5)	2 Ll, metamorfi Ll, canta Sq, Ep, Ll, Rm						innorat	portiunea de transect intre sosea si capcana 1 este inundata
2016.03.14	19:00:00	21	mt	30.8	16.6	3.2		0.5	a plouat noaptea (4-5)	2 Ll, metamorfi Ll, canta Sq, Ep, Ll, Rm						innorat	portiunea de transect intre sosea si capcana 1 este inundata
2016.03.14	19:00:00	22	mt	39	19.1	8.2		0.5	a plouat noaptea (4-5)	2 Ll, metamorfi Ll, canta Sq, Ep, Ll, Rm			canibal, are un ceratophrys in stokmac, foto			innorat	portiunea de transect intre sosea si capcana 1 este inundata
2016.03.14	19:00:00	23	mt	30.2	15.4	2.6		0.5	a plouat noaptea (4-5)	2 Ll, metamorfi Ll, canta Sq, Ep, Ll, Rm						innorat	portiunea de transect intre sosea si capcana 1 este inundata
2016.03.14	19:00:00	24	mt					0.5	a plouat noaptea (4-5)	2 Ll, metamorfi Ll, canta Sq, Ep, Ll, Rm						innorat	portiunea de transect intre sosea si capcana 1 este inundata
2016.03.14	19:00:00	25	mt					0.5	a plouat noaptea (4-5)	2 Ll, metamorfi Ll, canta Sq, Ep, Ll, Rm						innorat	portiunea de transect intre sosea si capcana 1 este inundata
2016.03.14	19:00:00	26	mt					0.5	a plouat noaptea (4-5)	2 Ll, metamorfi Ll, canta Sq, Ep, Ll, Rm						innorat	portiunea de transect intre sosea si capcana 1 este inundata
2016.03.14	19:00:00	27	f	68.4	29.3	39.6	apa	0.5	a plouat noaptea (4-5)	2 Ll, metamorfi Ll, canta Sq, Ep, Ll, Rm						innorat	portiunea de transect intre sosea si capcana 1 este inundata
2016.03.14	19:00:00	28	mt					0.5	a plouat noaptea (4-5)	2 Ll, metamorfi Ll, canta Sq, Ep, Ll, Rm						innorat	portiunea de transect intre sosea si capcana 1 este inundata
2016.03.14	19:00:00	29	mt					0.5	a plouat noaptea (4-5)	2 Ll, metamorfi Ll, canta Sq, Ep, Ll, Rm						innorat	portiunea de transect intre sosea si capcana 1 este inundata
2016.03.14	19:00:00	30	mt					0.5	a plouat noaptea (4-5)	2 Ll, metamorfi Ll, canta Sq, Ep, Ll, Rm						innorat	portiunea de transect intre sosea si capcana 1 este inundata
2016.03.14	19:00:00	31	mt					0.5	a plouat noaptea (4-5)	2 Ll, metamorfi Ll, canta Sq, Ep, Ll, Rm						innorat	portiunea de transect intre sosea si capcana 1 este inundata
2016.03.14	19:00:00	32	mt					0.5	a plouat noaptea (4-5)	2 Ll, metamorfi Ll, canta Sq, Ep, Ll, Rm						innorat	portiunea de transect intre sosea si capcana 1 este inundata
2016.03.14	19:00:00	33	mt					0.5	a plouat noaptea (4-5)	2 Ll, metamorfi Ll, canta Sq, Ep, Ll, Rm						innorat	portiunea de transect intre sosea si capcana 1 este inundata
2016.03.14	19:00:00	34	mt					0.5	a plouat noaptea (4-5)	2 Ll, metamorfi Ll, canta Sq, Ep, Ll, Rm						innorat	portiunea de transect intre sosea si capcana 1 este inundata
2016.03.14	19:00:00	35	mt					0.5	a plouat noaptea (4-5)	2 Ll, metamorfi Ll, canta Sq, Ep, Ll, Rm						innorat	portiunea de transect intre sosea si capcana 1 este inundata
2016.03.14	19:00:00	36	mt					0.5	a plouat noaptea (4-5)	2 Ll, metamorfi Ll, canta Sq, Ep, Ll, Rm						innorat	portiunea de transect intre sosea si capcana 1 este inundata
2016.03.14	19:00:00	37	mt					0.5	a plouat noaptea (4-5)	2 Ll, metamorfi Ll, canta Sq, Ep, Ll, Rm						innorat	portiunea de transect intre sosea si capcana 1 este inundata
2016.03.14	19:00:00	38	mt					0.5	a plouat noaptea (4-5)	2 Ll, metamorfi Ll, canta Sq, Ep, Ll, Rm						innorat	portiunea de transect intre sosea si capcana 1 este inundata
2016.03.15	12:00:00	1	mt	33.2	17.2	3	ascuns in vegetatie	0		metamorfi Ll						senin	portiunea de transect intre sosea si capcana 1 este inundata
2016.03.15	12:00:00	2	mt					0		metamorfi Ll						senin	portiunea de transect intre sosea si capcana 1 este inundata
2016.03.15	12:00:00	3	mt	34.1	17.5	3	ascuns in vegetatie	0		metamorfi Ll						senin	portiunea de transect intre sosea si capcana 1 este inundata
2016.03.15	12:00:00	4	mt	33.2	16.9	2.9	ascuns in vegetatie	0		metamorfi Ll						senin	portiunea de transect intre sosea si capcana 1 este inundata
2016.03.15	12:00:00	5	mt	28.4	15.7	2.5	ascuns in vegetatie	0		metamorfi Ll						senin	portiunea de transect intre sosea si capcana 1 este inundata
2016.03.15	12:00:00	6	mt	30.6	16.7	2.6	ascuns in vegetatie	0		metamorfi Ll						senin	portiunea de transect intre sosea si capcana 1 este inundata
2016.03.15	12:00:00	7	mt	30.4	17.5	2.7	ascuns in vegetatie	0		metamorfi Ll						senin	portiunea de transect intre sosea si capcana 1 este inundata
2016.03.15	12:00:00	8	mt					0		metamorfi Ll						senin	portiunea de transect intre sosea si capcana 1 este inundata
2016.03.15	12:00:00	9	mt	33.7	18.1	3.6	ascuns in vegetatie	0		metamorfi Ll						senin	portiunea de transect intre sosea si capcana 1 este inundata
2016.03.15	12:00:00	10	mt					0		metamorfi Ll						senin	portiunea de transect intre sosea si capcana 1 este inundata
2016.03.15	12:00:00	11	mt	33	17.3	3.4	ascuns in vegetatie	0		metamorfi Ll						senin	portiunea de transect intre sosea si capcana 1 este inundata
2016.03.15	12:00:00	12	mt					0		metamorfi Ll						senin	portiunea de transect intre sosea si capcana 1 este inundata
2016.03.15	12:00:00	13	mt	29.7	14	1.9	ascuns in vegetatie	0		metamorfi Ll						senin	portiunea de transect intre sosea si capcana 1 este inundata
2016.03.15	12:00:00	14	mt	31.4	18.5	2.9	ascuns in vegetatie	0		metamorfi Ll						senin	portiunea de transect intre sosea si capcana 1 este inundata
2016.03.15	12:00:00	15	mt	30.3	17.5	2.8	ascuns in vegetatie	0		metamorfi Ll						senin	portiunea de transect intre sosea si capcana 1 este inundata
2016.03.15	12:00:00	16	mt	30.3	16.9	2.9	ascuns in vegetatie	0		metamorfi Ll						senin	portiunea de transect intre sosea si capcana 1 este inundata
2016.03.15	12:00:00	17	mt	33.1	17.5	2.4	ascuns in vegetatie	0		metamorfi Ll						senin	portiunea de transect intre sosea si capcana 1 este inundata
2016.03.15	12:00:00	18	mt	30.4	16.4	2.7	ascuns in vegetatie	0		metamorfi Ll						senin	portiunea de transect intre sosea si capcana 1 este inundata
2016.03.15	12:00:00	19	mt	32.1	17.7	4.1	ascuns in vegetatie	0		metamorfi Ll						senin	portiunea de transect intre sosea si capcana 1 este inundata
2016.03.15	12:00:00	20	mt	31.1	14.9	2.7	ascuns in vegetatie	0		metamorfi Ll						senin	portiunea de transect intre sosea si capcana 1 este inundata
2016.03.15	12:00:00	21	mt	32.3	17.2	3.3	ascuns in vegetatie	0		metamorfi Ll						senin	portiunea de transect intre sosea si capcana 1 este inundata
2016.03.15	12:00:00	22	mt	32.5	16.3	2.5	ascuns in vegetatie	0		metamorfi Ll						senin	portiunea de transect intre sosea si capcana 1 este inundata
2016.03.15	12:00:00	23	mt	34.6	18.2	3.3	ascuns in vegetatie	0		metamorfi Ll						senin	portiunea de transect intre sosea si capcana 1 este inundata
2016.03.15	12:00:00	24	mt	31	15.6	2.5	ascuns in vegetatie	0		metamorfi Ll						senin	portiunea de transect intre sosea si capcana 1 este inundata
2016.03.15	12:00:00	25	mt					0		metamorfi Ll						senin	portiunea de transect intre sosea si capcana 1 este inundata
2016.03.15	12:00:00	26	mt					0		metamorfi Ll						senin	portiunea de transect intre sosea si capcana 1 este inundata
2016.03.15	12:00:00	27	mt					0		metamorfi Ll						senin	portiunea de transect intre sosea si capcana 1 este inundata
2016.03.15	12:00:00	28	mt					0		metamorfi Ll						senin	portiunea de transect intre sosea si capcana 1 este inundata
2016.03.15	12:00:00	29	mt					0		metamorfi Ll						senin	portiunea de transect intre sosea si capcana 1 este inundata
2016.03.15	12:00:00	30	mt					0		metamorfi Ll						senin	portiunea de transect intre sosea si capcana 1 este inundata
2016.03.15	12:00:00	31	mt					0		metamorfi Ll						senin	portiunea de transect intre sosea si capcana 1 este inundata
2016.03.15	12:00:00	32	mt					0		metamorfi Ll						senin	portiunea de transect intre sosea si capcana 1 este inundata
2016.03.15	12:00:00	33	mt					0		metamorfi Ll						senin	portiunea de transect intre sosea si capcana 1 este inundata
2016.03.15	12:00:00	34	mt					0		metamorfi Ll						senin	portiunea de transect intre sosea si capcana 1 este inundata
2016.03.15	12:00:00	35	mt					0		metamorfi Ll						senin	portiunea de transect intre sosea si capcana 1 este inundata
2016.03.15	12:00:00	36	mt					0		metamorfi Ll						senin	portiunea de transect intre sosea si capcana 1 este inundata
2016.03.15	12:00:00	37	mt					0		metamorfi Ll						senin	portiunea de transect intre sosea si capcana 1 este inundata
2016.03.15	12:00:00	38	mt					0		metamorfi Ll						senin	portiunea de transect intre sosea si capcana 1 este inundata
2016.03.15	12:00:00	39	mt					0		metamorfi Ll						senin	portiunea de transect intre sosea si capcana 1 este inundata
2016.03.15	12:00:00	40	mt					0		metamorfi Ll						senin	portiunea de transect intre sosea si capcana 1 este inundata
2016.03.15	12:00:00	41	mt					0		metamorfi Ll						senin	portiunea de transect intre sosea si capcana 1 este inundata
2016.03.15	12:00:00	42	mt					0		metamorfi Ll						senin	portiunea de transect intre sosea si capcana 1 este inundata
2016.03.15	12:00:00	43	mt					0		metamorfi Ll						senin	portiunea de transect intre sosea si capcana 1 este inundata
2016.03.15	12:00:00	44	mt					0		metamorfi Ll						senin	portiunea de transect intre sosea si capcana 1 este inundata
2016.03.15	12:00:00	45	mt					0		metamorfi Ll						senin	portiunea de transect intre sosea si capcana 1 este inundata
2016.03.15	12:00:00	46	mt					0		metamorfi Ll						senin	portiunea de transect intre sosea si capcana 1 este inundata
2016.03.15	12:00:00	47	mt					0		metamorfi Ll						senin	portiunea de transect intre sosea si capcana 1 este inundata
2016.03.15	12:00:00	48	mt					0		metamorfi Ll						senin	portiunea de transect intre sosea si capcana 1 este inundata
2016.03.15	12:00:00	49	mt					0		metamorfi Ll						senin	portiunea de transect intre sosea si capcana 1 este inundata
2016.03.15	12:00:00	50	mt					0		metamorfi Ll						senin	portiunea de transect intre sosea si capcana 1 este inundata
2016.03.15	12:00:00	51	mt					0		metamorfi Ll						senin	portiunea de transect intre sosea si capcana 1 este inundata
2016.03.15	12:00:00	52	mt					0		metamorfi Ll						senin	portiunea de transect intre sosea si capcana 1 este inundata
2016.03.15	12:00:00	53	mt					0		metamorfi Ll						senin	portiunea de transect intre sosea si capcana 1 este inundata
2016.03.15	12:00:00	54	mt					0		metamorfi Ll						senin	portiunea de transect intre sosea si capcana 1 este inundata
2016.03.15	12:00:00	55	mt					0		metamorfi Ll						senin	portiunea de transect intre sosea si capcana 1 este inundata
2016.03.15	12:00:00	56	mt					0		metamorfi Ll						senin	portiunea de transect intre sosea si capcana 1 este inundata
2016.03.15	12:00:00	57	mt					0		metamorfi Ll						senin	portiunea de transect intre sosea si capcana 1 este inundata
2016.03.15	12:00:00	58	mt					0		metamorfi Ll						senin	portiunea de transect intre sosea si capcana 1 este inundata
2016.03.15	12:00:00	59	mt					0		metamorfi Ll						senin	portiunea de transect intre sosea si capcana 1 este inundata
2016.03.15	12:00:00	60	mt					0		metamorfi Ll						senin	portiunea de transect intre sosea si capcana 1 este inundata
2016.03.15	12:00:00	61	mt					0		metamorfi Ll						senin	portiunea de transect intre sosea si capcana 1 este inundata
2016.03.15	12:00:00	62	mt					0		metamorfi Ll						senin	portiunea de transect intre sosea si capcana 1 este inundata
2016.03.15	12:00:00	63	mt					0		metamorfi Ll						senin	portiunea de transect intre sosea si capcana 1 este inundata
2016.03.15	12:00:00	64	mt					0		metamorfi Ll						senin	portiunea de transect intre sosea si capcana 1 este inundata
2016.03.15	12:00:00	65	mt					0		metamorfi Ll						senin	portiunea de transect intre sosea si capcana 1 este inundata
2016.03.15	12:00:00	66	mt					0		metamorfi Ll						senin	portiunea de transect intre sosea si capcana 1 este inundata
2016.03.15	12:00:00	67	mt					0		metamorfi Ll						senin	portiunea de transect intre sosea si capcana 1 este inundata
2016.03.15	12:00:00	68	mt					0		metamorfi Ll						senin	portiunea de transect intre sosea si capcana 1 este inundata
2016.03.15	12:00:00	69	mt					0		metamorfi Ll						senin	portiunea de transect intre sosea si capcana 1 este inundata
2016.03.15	12:00:00	70	mt					0		metamorfi Ll						senin	portiunea de transect intre sosea si capcana 1 este inundata
2016.03.15	12:00:00	71	mt					0		metamorfi Ll						senin	portiunea de transect intre sosea si capcana 1 este inundata
2016.03.15	12:00:00	72	mt	37.9	21.3	5.1		0		metamorfi Ll			canib 73			senin	portiunea de transect intre sosea si capcana 1 este inundata
2016.03.15	12:00:00	73	mt	33.1	16.9	3.2		0		metamorfi Ll						senin	portiunea de transect intre sosea si capcana 1 este inundata
2016.03.15	12:00:00	74	mt					0		metamorfi Ll						senin	portiunea de transect intre sosea si capcana 1 este inundata
2016.03.15	12:00:00	75	mt					0		metamorfi Ll						senin	portiunea de transect intre sosea si capcana 1 este inundata
2016.03.15	12:00:00	76	mt					0		metamorfi Ll						senin	portiunea de transect intre sosea si capcana 1 este inundata
2016.03.15	12:00:00	77	mt					0		metamorfi Ll						senin	portiunea de transect intre sosea si capcana 1 este inundata
2016.03.15	12:00:00	78	mt					0		metamorfi Ll						senin	portiunea de transect intre sosea si capcana 1 este inundata
2016.03.15	12:00:00	79	mt					0		metamorfi Ll						senin	portiunea de transect intre sosea si capcana 1 este inundata
2016.03.15	12:00:00	80	mt					0		metamorfi Ll						senin	portiunea de transect intre sosea si capcana 1 este inundata
2016.03.15	12:00:00	81	mt					0		metamorfi Ll						senin	portiunea de transect intre sosea si capcana 1 este inundata
2016.03.15	12:00:00	82	mt					0		metamorfi Ll						senin	portiunea de transect intre sosea si capcana 1 este inundata
2016.03.15	12:00:00	83	mt					0		metamorfi Ll						senin	portiunea de transect intre sosea si capcana 1 este inundata
2016.03.15	12:00:00	84	mt					0		metamorfi Ll						senin	portiunea de transect intre sosea si capcana 1 este inundata
2016.03.15	12:00:00	85	mt					0		metamorfi Ll						senin	portiunea de transect intre sosea si capcana 1 este inundata
2016.03.15	12:00:00	86	mt					0		metamorfi Ll						senin	portiunea de transect intre sosea si capcana 1 este inundata
2016.03.15	12:00:00	87	mt					0		metamorfi Ll						senin	portiunea de transect intre sosea si capcana 1 este inundata
2016.03.15	12:00:00	88	mt					0		metamorfi Ll						senin	portiunea de transect intre sosea si capcana 1 este inundata
2016.03.15	12:00:00	89	mt					0		metamorfi Ll						senin	portiunea de transect intre sosea si capcana 1 este inundata
2016.03.15	12:00:00	90	mt					0		metamorfi Ll						senin	portiunea de transect intre sosea si capcana 1 este inundata
2016.03.15	12:00:00	91	mt					0		metamorfi Ll						senin	portiunea de transect intre sosea si capcana 1 este inundata
2016.03.15	12:00:00	92	mt					0		metamorfi Ll						senin	portiunea de transect intre sosea si capcana 1 este inundata
2016.03.15	12:00:00	93	mt					0		metamorfi Ll						senin	portiunea de transect intre sosea si capcana 1 este inundata
2016.03.15	12:00:00	94	mt					0		metamorfi Ll						senin	portiunea de transect intre sosea si capcana 1 este inundata
2016.03.15	12:00:00	95	mt					0		metamorfi Ll						senin	portiunea de transect intre sosea si capcana 1 este inundata
2016.03.15	12:00:00	96	mt					0		metamorfi Ll						senin	portiunea de transect intre sosea si capcana 1 este inundata
2016.03.15	12:00:00	97	mt					0		metamorfi Ll						senin	portiunea de transect intre sosea si capcana 1 este inundata
2016.03.15	12:00:00	98	mt					0		metamorfi Ll						senin	portiunea de transect intre sosea si capcana 1 este inundata
2016.03.15	12:00:00	99	mt					0		metamorfi Ll						senin	portiunea de transect intre sosea si capcana 1 este inundata
2016.03.15	12:00:00	100	mt					0		metamorfi Ll						senin	portiunea de transect intre sosea si capcana 1 este inundata
2016.03.15	12:00:00	101	mt					0		metamorfi Ll						senin	portiunea de transect intre sosea si capcana 1 este inundata
2016.03.15	12:00:00	102	mt					0		metamorfi Ll						senin	portiunea de transect intre sosea si capcana 1 este inundata
2016.03.15	12:00:00	103	mt					0		metamorfi Ll						senin	portiunea de transect intre sosea si capcana 1 este inundata
2016.03.15	12:00:00	104	mt					0		metamorfi Ll						senin	portiunea de transect intre sosea si capcana 1 este inundata
2016.03.15	12:00:00	105	mt					0		metamorfi Ll						senin	portiunea de transect intre sosea si capcana 1 este inundata
2016.03.15	12:00:00	106	mt					0		metamorfi Ll						senin	portiunea de transect intre sosea si capcana 1 este inundata
2016.03.15	12:00:00	107	mt					0		metamorfi Ll						senin	portiunea de transect intre sosea si capcana 1 este inundata
2016.03.15	12:00:00	108	mt					0		metamorfi Ll						senin	portiunea de transect intre sosea si capcana 1 este inundata
2016.03.15	12:00:00	109	mt					0		metamorfi Ll						senin	portiunea de transect intre sosea si capcana 1 este inundata
2016.03.15	12:00:00	110	mt					0		metamorfi Ll						senin	portiunea de transect intre sosea si capcana 1 este inundata
2016.03.15	12:00:00	111	mt					0		metamorfi Ll						senin	portiunea de transect intre sosea si capcana 1 este inundata
2016.03.15	12:00:00	112	mt					0		metamorfi Ll						senin	portiunea de transect intre sosea si capcana 1 este inundata
2016.03.15	12:00:00	113	mt					0		metamorfi Ll						senin	portiunea de transect intre sosea si capcana 1 este inundata
2016.03.15	12:00:00	114	mt					0		metamorfi Ll						senin	portiunea de transect intre sosea si capcana 1 este inundata
2016.03.15	12:00:00	115	mt					0		metamorfi Ll						senin	portiunea de transect intre sosea si capcana 1 este inundata
2016.03.15	12:00:00	116	mt					0		metamorfi Ll						senin	portiunea de transect intre sosea si capcana 1 este inundata
2016.03.15	12:00:00	117	mt					0		metamorfi Ll						senin	portiunea de transect intre sosea si capcana 1 este inundata
2016.03.15	12:00:00	118	mt					0		metamorfi Ll						senin	portiunea de transect intre sosea si capcana 1 este inundata
2016.03.15	12:00:00	119	mt					0		metamorfi Ll						senin	portiunea de transect intre sosea si capcana 1 este inundata
2016.03.15	12:00:00	120	mt					0		metamorfi Ll						senin	portiunea de transect intre sosea si capcana 1 este inundata
2016.03.15	12:00:00	121	mt					0		metamorfi Ll						senin	portiunea de transect intre sosea si capcana 1 este inundata
2016.03.15	12:00:00	122	mt					0		metamorfi Ll						senin	portiunea de transect intre sosea si capcana 1 este inundata
2016.03.15	12:00:00	123	mt					0		metamorfi Ll						senin	portiunea de transect intre sosea si capcana 1 este inundata
2016.03.15	12:00:00	124	mt					0		metamorfi Ll						senin	portiunea de transect intre sosea si capcana 1 este inundata
2016.03.15	12:00:00	125	mt					0		metamorfi Ll						senin	portiunea de transect intre sosea si capcana 1 este inundata
2016.03.15	12:00:00	126	mt					0		metamorfi Ll						senin	portiunea de transect intre sosea si capcana 1 este inundata
2016.03.15	12:00:00	127	mt					0		metamorfi Ll						senin	portiunea de transect intre sosea si capcana 1 este inundata
2016.03.15	12:00:00	128	mt					0		metamorfi Ll						senin	portiunea de transect intre sosea si capcana 1 este inundata
2016.03.15	12:00:00	129	mt					0		metamorfi Ll						senin	portiunea de transect intre sosea si capcana 1 este inundata
2016.03.15	12:00:00	130	mt					0		metamorfi Ll						senin	portiunea de transect intre sosea si capcana 1 este inundata
2016.03.15	12:00:00	131	mt					0		metamorfi Ll						senin	portiunea de transect intre sosea si capcana 1 este inundata
2016.03.15	12:00:00	132	mt					0		metamorfi Ll						senin	portiunea de transect intre sosea si capcana 1 este inundata
2016.03.15	12:00:00	133	mt					0		metamorfi Ll						senin	portiunea de transect intre sosea si capcana 1 este inundata
2016.03.15	12:00:00	134	mt					0		metamorfi Ll						senin	portiunea de transect intre sosea si capcana 1 este inundata
2016.03.15	12:00:00	135	mt					0		metamorfi Ll						senin	portiunea de transect intre sosea si capcana 1 este inundata
2016.03.15	12:00:00	136	mt					0		metamorfi Ll						senin	portiunea de transect intre sosea si capcana 1 este inundata
2016.03.15	12:00:00	137	mt					0		metamorfi Ll						senin	portiunea de transect intre sosea si capcana 1 este inundata
2016.03.15	12:00:00	138	mt					0		metamorfi Ll						senin	portiunea de transect intre sosea si capcana 1 este inundata
2016.03.15	12:00:00	139	mt					0		metamorfi Ll						senin	portiunea de transect intre sosea si capcana 1 este inundata
2016.03.15	12:00:00	140	mt					0		metamorfi Ll						senin	portiunea de transect intre sosea si capcana 1 este inundata
2016.03.15	12:00:00	141	mt					0		metamorfi Ll						senin	portiunea de transect intre sosea si capcana 1 este inundata
2016.03.15	12:00:00	142	mt					0		metamorfi Ll						senin	portiunea de transect intre sosea si capcana 1 este inundata
2016.03.15	12:00:00	143	mt					0		metamorfi Ll						senin	portiunea de transect intre sosea si capcana 1 este inundata
2016.03.15	12:00:00	144	mt					0		metamorfi Ll						senin	portiunea de transect intre sosea si capcana 1 este inundata
2016.03.15	12:00:00	145	mt					0		metamorfi Ll						senin	portiunea de transect intre sosea si capcana 1 este inundata
2016.03.15	12:00:00	146	mt					0		metamorfi Ll						senin	portiunea de transect intre sosea si capcana 1 este inundata
2016.03.15	12:00:00	147	mt					0		metamorfi Ll						senin	portiunea de transect intre sosea si capcana 1 este inundata
2016.03.15	12:00:00	148	mt					0		metamorfi Ll						senin	portiunea de transect intre sosea si capcana 1 este inundata
2016.03.15	12:00:00	149	mt					0		metamorfi Ll						senin	portiunea de transect intre sosea si capcana 1 este inundata
2016.03.15	12:00:00	150	mt					0		metamorfi Ll						senin	portiunea de transect intre sosea si capcana 1 este inundata
2016.03.15	12:00:00	151	mt					0		metamorfi Ll						senin	portiunea de transect intre sosea si capcana 1 este inundata
2016.03.15	12:00:00	152	mt					0		metamorfi Ll						senin	portiunea de transect intre sosea si capcana 1 este inundata
2016.03.15	12:00:00	153	mt					0		metamorfi Ll						senin	portiunea de transect intre sosea si capcana 1 este inundata
2016.03.15	12:00:00	154	mt					0		metamorfi Ll						senin	portiunea de transect intre sosea si capcana 1 este inundata
2016.03.15	12:00:00	155	mt					0		metamorfi Ll						senin	portiunea de transect intre sosea si capcana 1 este inundata
2016.03.15	12:00:00	156	mt					0		metamorfi Ll						senin	portiunea de transect intre sosea si capcana 1 este inundata
2016.03.15	12:00:00	157	mt					0		metamorfi Ll						senin	portiunea de transect intre sosea si capcana 1 este inundata
2016.03.15	12:00:00	158	mt					0		metamorfi Ll						senin	portiunea de transect intre sosea si capcana 1 este inundata
2016.03.15	12:00:00	159	mt					0		metamorfi Ll						senin	portiunea de transect intre sosea si capcana 1 este inundata
2016.03.15	12:00:00	160	mt					0		metamorfi Ll						senin	portiunea de transect intre sosea si capcana 1 este inundata
2016.03.15	12:00:00	161	mt					0		metamorfi Ll						senin	portiunea de transect intre sosea si capcana 1 este inundata
2016.03.15	12:00:00	162	mt					0		metamorfi Ll						senin	portiunea de transect intre sosea si capcana 1 este inundata
2016.03.15	12:00:00	163	mt					0		metamorfi Ll						senin	portiunea de transect intre sosea si capcana 1 este inundata
2016.03.15	12:00:00	164	mt					0		metamorfi Ll						senin	portiunea de transect intre sosea si capcana 1 este inundata
2016.03.15	12:00:00	165	mt					0		metamorfi Ll						senin	portiunea de transect intre sosea si capcana 1 este inundata
2016.03.15	12:00:00	166	mt					0		metamorfi Ll						senin	portiunea de transect intre sosea si capcana 1 este inundata
2016.03.15	12:00:00	167	mt					0		metamorfi Ll						senin	portiunea de transect intre sosea si capcana 1 este inundata
2016.03.15	12:00:00	168	mt					0		metamorfi Ll						senin	portiunea de transect intre sosea si capcana 1 este inundata
2016.03.15	12:00:00	169	mt					0		metamorfi Ll						senin	portiunea de transect intre sosea si capcana 1 este inundata
2016.03.15	12:00:00	170	mt					0		metamorfi Ll						senin	portiunea de transect intre sosea si capcana 1 este inundata
2016.03.15	12:00:00	171	mt					0		metamorfi Ll						senin	portiunea de transect intre sosea si capcana 1 este inundata
2016.03.15	12:00:00	172	mt					0		metamorfi Ll						senin	portiunea de transect intre sosea si capcana 1 este inundata
2016.03.15	12:00:00	173	mt					0		metamorfi Ll						senin	portiunea de transect intre sosea si capcana 1 este inundata
2016.03.15	12:00:00	174	mt					0		metamorfi Ll						senin	portiunea de transect intre sosea si capcana 1 este inundata
2016.03.15	12:00:00	175	mt					0		metamorfi Ll						senin	portiunea de transect intre sosea si capcana 1 este inundata
2016.03.15	12:00:00	176	mt					0		metamorfi Ll						senin	portiunea de transect intre sosea si capcana 1 este inundata
2016.03.15	12:00:00	177	mt					0		metamorfi Ll						senin	portiunea de transect intre sosea si capcana 1 este inundata
2016.03.15	12:00:00	178	mt					0		metamorfi Ll						senin	portiunea de transect intre sosea si capcana 1 este inundata
2016.03.15	12:00:00	179	mt					0		metamorfi Ll						senin	portiunea de transect intre sosea si capcana 1 este inundata
2016.03.15	12:00:00	180	mt					0		metamorfi Ll						senin	portiunea de transect intre sosea si capcana 1 este inundata
2016.03.15	12:00:00	181	mt					0		metamorfi Ll						senin	portiunea de transect intre sosea si capcana 1 este inundata
2016.03.15	12:00:00	182	mt					0		metamorfi Ll						senin	portiunea de transect intre sosea si capcana 1 este inundata
2016.03.15	12:00:00	183	mt					0		metamorfi Ll						senin	portiunea de transect intre sosea si capcana 1 este inundata
2016.03.15	12:00:00	184	mt					0		metamorfi Ll						senin	portiunea de transect intre sosea si capcana 1 este inundata
2016.03.15	12:00:00	185	mt					0		metamorfi Ll						senin	portiunea de transect intre sosea si capcana 1 este inundata
2016.03.15	12:00:00	186	mt					0		metamorfi Ll						senin	portiunea de transect intre sosea si capcana 1 este inundata
2016.03.15	12:00:00	187	mt					0		metamorfi Ll						senin	portiunea de transect intre sosea si capcana 1 este inundata
2016.03.15	12:00:00	188	mt					0		metamorfi Ll						senin	portiunea de transect intre sosea si capcana 1 este inundata
2016.03.15	12:00:00	189	mt					0		metamorfi Ll						senin	portiunea de transect intre sosea si capcana 1 este inundata
2016.03.15	12:00:00	190	mt					0		metamorfi Ll						senin	portiunea de transect intre sosea si capcana 1 este inundata
2016.03.15	12:00:00	191	mt	28.6	14.7	1.8		0		metamorfi Ll			canib 192			senin	portiunea de transect intre sosea si capcana 1 este inundata
2016.03.15	12:00:00	192	mt	25.7	13.2	1.7		0		metamorfi Ll						senin	portiunea de transect intre sosea si capcana 1 este inundata
2016.03.15	12:00:00	193	mt					0		metamorfi Ll						senin	portiunea de transect intre sosea si capcana 1 este inundata
2016.03.15	12:00:00	194	mt					0		metamorfi Ll						senin	portiunea de transect intre sosea si capcana 1 este inundata
2016.03.15	12:00:00	195	mt					0		metamorfi Ll						senin	portiunea de transect intre sosea si capcana 1 este inundata
2016.03.15	12:00:00	196	mt					0		metamorfi Ll						senin	portiunea de transect intre sosea si capcana 1 este inundata
2016.03.15	12:00:00	197	mt					0		metamorfi Ll						senin	portiunea de transect intre sosea si capcana 1 este inundata
2016.03.15	12:00:00	198	mt					0		metamorfi Ll						senin	portiunea de transect intre sosea si capcana 1 este inundata
2016.03.15	12:00:00	199	mt					0		metamorfi Ll						senin	portiunea de transect intre sosea si capcana 1 este inundata
2016.03.15	12:00:00	200	mt					0		metamorfi Ll						senin	portiunea de transect intre sosea si capcana 1 este inundata
2016.03.15	12:00:00	201	mt					0		metamorfi Ll						senin	portiunea de transect intre sosea si capcana 1 este inundata
2016.03.15	12:00:00	202	mt					0		metamorfi Ll						senin	portiunea de transect intre sosea si capcana 1 este inundata
2016.03.15	12:00:00	203	mt					0		metamorfi Ll						senin	portiunea de transect intre sosea si capcana 1 este inundata
2016.03.15	12:00:00	204	mt					0		metamorfi Ll						senin	portiunea de transect intre sosea si capcana 1 este inundata
2016.03.15	12:00:00	205	mt					0		metamorfi Ll			canib foto			senin	portiunea de transect intre sosea si capcana 1 este inundata
2016.03.15	12:00:00	206	mt					0		metamorfi Ll						senin	portiunea de transect intre sosea si capcana 1 este inundata
2016.03.15	12:00:00	207	mt					0		metamorfi Ll						senin	portiunea de transect intre sosea si capcana 1 este inundata
2016.03.15	12:00:00	208	mt					0		metamorfi Ll						senin	portiunea de transect intre sosea si capcana 1 este inundata
2016.03.15	12:00:00	209	mt					0		metamorfi Ll						senin	portiunea de transect intre sosea si capcana 1 este inundata
2016.03.15	12:00:00	210	mt					0		metamorfi Ll						senin	portiunea de transect intre sosea si capcana 1 este inundata
2016.03.15	12:00:00	211	mt					0		metamorfi Ll						senin	portiunea de transect intre sosea si capcana 1 este inundata
2016.03.15	12:00:00	212	mt					0		metamorfi Ll						senin	portiunea de transect intre sosea si capcana 1 este inundata
2016.03.15	12:00:00	213	mt					0		metamorfi Ll						senin	portiunea de transect intre sosea si capcana 1 este inundata
2016.03.15	12:00:00	214	mt					0		metamorfi Ll						senin	portiunea de transect intre sosea si capcana 1 este inundata
2016.03.15	12:00:00	215	mt					0		metamorfi Ll						senin	portiunea de transect intre sosea si capcana 1 este inundata
2016.03.15	12:00:00	216	mt					0		metamorfi Ll						senin	portiunea de transect intre sosea si capcana 1 este inundata
2016.03.15	12:00:00	217	mt					0		metamorfi Ll						senin	portiunea de transect intre sosea si capcana 1 este inundata
2016.03.15	12:00:00	218	mt					0		metamorfi Ll						senin	portiunea de transect intre sosea si capcana 1 este inundata
2016.03.15	12:00:00	219	mt					0		metamorfi Ll			canib foto			senin	portiunea de transect intre sosea si capcana 1 este inundata
2016.03.15	12:00:00	220	mt					0		metamorfi Ll						senin	portiunea de transect intre sosea si capcana 1 este inundata
2016.03.15	12:00:00	221	mt					0		metamorfi Ll						senin	portiunea de transect intre sosea si capcana 1 este inundata
2016.03.15	12:00:00	222	mt					0		metamorfi Ll						senin	portiunea de transect intre sosea si capcana 1 este inundata
2016.03.15	12:00:00	223	mt					0		metamorfi Ll						senin	portiunea de transect intre sosea si capcana 1 este inundata
2016.03.15	12:00:00	224	mt					0		metamorfi Ll						senin	portiunea de transect intre sosea si capcana 1 este inundata
2016.03.15	12:00:00	225	mt					0		metamorfi Ll						senin	portiunea de transect intre sosea si capcana 1 este inundata
2016.03.15	12:00:00	226	mt					0		metamorfi Ll						senin	portiunea de transect intre sosea si capcana 1 este inundata
2016.03.15	12:00:00	227	mt					0		metamorfi Ll						senin	portiunea de transect intre sosea si capcana 1 este inundata
2016.03.15	12:00:00	228	mt					0		metamorfi Ll						senin	portiunea de transect intre sosea si capcana 1 este inundata
2016.03.15	12:00:00	229	mt					0		metamorfi Ll						senin	portiunea de transect intre sosea si capcana 1 este inundata
2016.03.15	12:00:00	230	mt					0		metamorfi Ll						senin	portiunea de transect intre sosea si capcana 1 este inundata
2016.03.15	12:00:00	231	mt					0		metamorfi Ll						senin	portiunea de transect intre sosea si capcana 1 este inundata
2016.03.15	12:00:00	232	mt					0		metamorfi Ll						senin	portiunea de transect intre sosea si capcana 1 este inundata
2016.03.15	12:00:00	233	mt					0		metamorfi Ll						senin	portiunea de transect intre sosea si capcana 1 este inundata
2016.03.15	12:00:00	234	mt					0		metamorfi Ll						senin	portiunea de transect intre sosea si capcana 1 este inundata
2016.03.15	12:00:00	235	mt					0		metamorfi Ll						senin	portiunea de transect intre sosea si capcana 1 este inundata
2016.03.15	12:00:00	236	mt					0		metamorfi Ll						senin	portiunea de transect intre sosea si capcana 1 este inundata
2016.03.15	12:00:00	237	mt					0		metamorfi Ll						senin	portiunea de transect intre sosea si capcana 1 este inundata
2016.03.15	12:00:00	238	mt					0		metamorfi Ll						senin	portiunea de transect intre sosea si capcana 1 este inundata
2016.03.15	12:00:00	239	mt					0		metamorfi Ll						senin	portiunea de transect intre sosea si capcana 1 este inundata
2016.03.15	12:00:00	240	mt					0		metamorfi Ll						senin	portiunea de transect intre sosea si capcana 1 este inundata
2016.03.15	12:00:00	241	mt					0		metamorfi Ll						senin	portiunea de transect intre sosea si capcana 1 este inundata
2016.03.15	12:00:00	242	mt					0		metamorfi Ll						senin	portiunea de transect intre sosea si capcana 1 este inundata
2016.03.15	12:00:00	243	mt					0		metamorfi Ll						senin	portiunea de transect intre sosea si capcana 1 este inundata
2016.03.15	12:00:00	244	mt					0		metamorfi Ll						senin	portiunea de transect intre sosea si capcana 1 este inundata
2016.03.15	12:00:00	245	mt					0		metamorfi Ll						senin	portiunea de transect intre sosea si capcana 1 este inundata
2016.03.15	12:00:00	246	mt					0		metamorfi Ll						senin	portiunea de transect intre sosea si capcana 1 este inundata
2016.03.15	12:00:00	247	mt					0		metamorfi Ll						senin	portiunea de transect intre sosea si capcana 1 este inundata
2016.03.15	12:00:00	248	mt					0		metamorfi Ll						senin	portiunea de transect intre sosea si capcana 1 este inundata
2016.03.15	12:00:00	249	mt					0		metamorfi Ll						senin	portiunea de transect intre sosea si capcana 1 este inundata
2016.03.15	12:00:00	250	mt					0		metamorfi Ll						senin	portiunea de transect intre sosea si capcana 1 este inundata
2016.03.15	12:00:00	251	mt					0		metamorfi Ll						senin	portiunea de transect intre sosea si capcana 1 este inundata
2016.03.15	12:00:00	252	mt					0		metamorfi Ll						senin	portiunea de transect intre sosea si capcana 1 este inundata
2016.03.15	12:00:00	253	mt					0		metamorfi Ll						senin	portiunea de transect intre sosea si capcana 1 este inundata
2016.03.15	12:00:00	254	mt					0		metamorfi Ll						senin	portiunea de transect intre sosea si capcana 1 este inundata
2016.03.15	12:00:00	255	mt					0		metamorfi Ll						senin	portiunea de transect intre sosea si capcana 1 este inundata
2016.03.15	12:00:00	256	mt					0		metamorfi Ll						senin	portiunea de transect intre sosea si capcana 1 este inundata
2016.03.15	12:00:00	257	mt					0		metamorfi Ll						senin	portiunea de transect intre sosea si capcana 1 este inundata
2016.03.15	12:00:00	258	mt					0		metamorfi Ll						senin	portiunea de transect intre sosea si capcana 1 este inundata
2016.03.15	12:00:00	259	mt					0		metamorfi Ll						senin	portiunea de transect intre sosea si capcana 1 este inundata
2016.03.15	12:00:00	260	mt					0		metamorfi Ll						senin	portiunea de transect intre sosea si capcana 1 este inundata
2016.03.15	12:00:00	261	mt					0		metamorfi Ll						senin	portiunea de transect intre sosea si capcana 1 este inundata
2016.03.15	12:00:00	262	mt					0		metamorfi Ll						senin	portiunea de transect intre sosea si capcana 1 este inundata
2016.03.15	12:00:00	263	mt					0		metamorfi Ll						senin	portiunea de transect intre sosea si capcana 1 este inundata
2016.03.15	12:00:00	264	mt					0		metamorfi Ll						senin	portiunea de transect intre sosea si capcana 1 este inundata
2016.03.15	12:00:00	265	mt					0		metamorfi Ll						senin	portiunea de transect intre sosea si capcana 1 este inundata
2016.03.15	12:00:00	266	mt					0		metamorfi Ll						senin	portiunea de transect intre sosea si capcana 1 este inundata
2016.03.15	12:00:00	267	mt					0		metamorfi Ll						senin	portiunea de transect intre sosea si capcana 1 este inundata
2016.03.15	12:00:00	268	mt					0		metamorfi Ll						senin	portiunea de transect intre sosea si capcana 1 este inundata
2016.03.15	12:00:00	269	mt					0		metamorfi Ll						senin	portiunea de transect intre sosea si capcana 1 este inundata
2016.03.15	12:00:00	270	mt					0		metamorfi Ll						senin	portiunea de transect intre sosea si capcana 1 este inundata
2016.03.15	12:00:00	271	mt					0		metamorfi Ll						senin	portiunea de transect intre sosea si capcana 1 este inundata
2016.03.15	12:00:00	272	mt					0		metamorfi Ll						senin	portiunea de transect intre sosea si capcana 1 este inundata
2016.03.15	12:00:00	273	mt					0		metamorfi Ll						senin	portiunea de transect intre sosea si capcana 1 este inundata
2016.03.15	12:00:00	274	mt					0		metamorfi Ll						senin	portiunea de transect intre sosea si capcana 1 este inundata
2016.03.15	12:00:00	275	mt					0		metamorfi Ll						senin	portiunea de transect intre sosea si capcana 1 este inundata
2016.03.15	12:00:00	276	mt					0		metamorfi Ll						senin	portiunea de transect intre sosea si capcana 1 este inundata
2016.03.15	12:00:00	277	mt					0		metamorfi Ll						senin	portiunea de transect intre sosea si capcana 1 este inundata
2016.03.15	12:00:00	278	mt					0		metamorfi Ll						senin	portiunea de transect intre sosea si capcana 1 este inundata
2016.03.15	12:00:00	279	mt					0		metamorfi Ll						senin	portiunea de transect intre sosea si capcana 1 este inundata
2016.03.15	12:00:00	280	mt					0		metamorfi Ll						senin	portiunea de transect intre sosea si capcana 1 este inundata
2016.03.15	12:00:00	281	mt					0		metamorfi Ll						senin	portiunea de transect intre sosea si capcana 1 este inundata
2016.03.15	12:00:00	282	mt					0		metamorfi Ll						senin	portiunea de transect intre sosea si capcana 1 este inundata
2016.03.15	12:00:00	283	mt					0		metamorfi Ll						senin	portiunea de transect intre sosea si capcana 1 este inundata
2016.03.15	12:00:00	284	mt					0		metamorfi Ll						senin	portiunea de transect intre sosea si capcana 1 este inundata
2016.03.15	12:00:00	285	mt					0		metamorfi Ll						senin	portiunea de transect intre sosea si capcana 1 este inundata
2016.03.15	12:00:00	286	mt					0		metamorfi Ll						senin	portiunea de transect intre sosea si capcana 1 este inundata
2016.03.15	12:00:00	287	mt					0		metamorfi Ll						senin	portiunea de transect intre sosea si capcana 1 este inundata
2016.03.15	12:00:00	288	mt					0		metamorfi Ll						senin	portiunea de transect intre sosea si capcana 1 este inundata
2016.03.15	12:00:00	289	mt					0		metamorfi Ll						senin	portiunea de transect intre sosea si capcana 1 este inundata
2016.03.15	12:00:00	290	mt					0		metamorfi Ll						senin	portiunea de transect intre sosea si capcana 1 este inundata
2016.03.15	12:00:00	291	mt					0		metamorfi Ll						senin	portiunea de transect intre sosea si capcana 1 este inundata
2016.03.15	12:00:00	292	mt					0		metamorfi Ll						senin	portiunea de transect intre sosea si capcana 1 este inundata
2016.03.15	12:00:00	293	mt					0		metamorfi Ll						senin	portiunea de transect intre sosea si capcana 1 este inundata
2016.03.15	12:00:00	294	mt					0		metamorfi Ll						senin	portiunea de transect intre sosea si capcana 1 este inundata
2016.03.15	12:00:00	295	mt					0		metamorfi Ll						senin	portiunea de transect intre sosea si capcana 1 este inundata
2016.03.15	12:00:00	296	mt					0		metamorfi Ll						senin	portiunea de transect intre sosea si capcana 1 este inundata
2016.03.15	12:00:00	297	mt					0		metamorfi Ll						senin	portiunea de transect intre sosea si capcana 1 este inundata
2016.03.15	12:00:00	298	mt					0		metamorfi Ll						senin	portiunea de transect intre sosea si capcana 1 este inundata
2016.03.15	12:00:00	299	mt					0		metamorfi Ll						senin	portiunea de transect intre sosea si capcana 1 este inundata
2016.03.15	12:00:00	300	mt					0		metamorfi Ll						senin	portiunea de transect intre sosea si capcana 1 este inundata
2016.03.15	12:00:00	301	mt					0		metamorfi Ll						senin	portiunea de transect intre sosea si capcana 1 este inundata
2016.03.15	12:00:00	302	mt					0		metamorfi Ll						senin	portiunea de transect intre sosea si capcana 1 este inundata
2016.03.15	12:00:00	303	mt					0		metamorfi Ll						senin	portiunea de transect intre sosea si capcana 1 este inundata
2016.03.15	12:00:00	304	mt					0		metamorfi Ll						senin	portiunea de transect intre sosea si capcana 1 este inundata
2016.03.15	12:00:00	305	mt					0		metamorfi Ll			canib foto			senin	portiunea de transect intre sosea si capcana 1 este inundata
2016.03.15	12:00:00	306	mt					0		metamorfi Ll						senin	portiunea de transect intre sosea si capcana 1 este inundata
2016.03.15	12:00:00	307	mt					0		metamorfi Ll						senin	portiunea de transect intre sosea si capcana 1 este inundata
2016.03.15	12:00:00	308	mt					0		metamorfi Ll						senin	portiunea de transect intre sosea si capcana 1 este inundata
2016.03.15	12:00:00	309	mt					0		metamorfi Ll						senin	portiunea de transect intre sosea si capcana 1 este inundata
2016.03.15	12:00:00	310	mt					0		metamorfi Ll						senin	portiunea de transect intre sosea si capcana 1 este inundata
2016.03.15	12:00:00	311	mt					0		metamorfi Ll						senin	portiunea de transect intre sosea si capcana 1 este inundata
2016.03.15	12:00:00	312	mt					0		metamorfi Ll						senin	portiunea de transect intre sosea si capcana 1 este inundata
2016.03.15	12:00:00	313	mt					0		metamorfi Ll						senin	portiunea de transect intre sosea si capcana 1 este inundata
2016.03.15	12:00:00	314	mt					0		metamorfi Ll						senin	portiunea de transect intre sosea si capcana 1 este inundata
2016.03.15	12:00:00	315	mt					0		metamorfi Ll						senin	portiunea de transect intre sosea si capcana 1 este inundata
2016.03.15	12:00:00	316	mt					0		metamorfi Ll						senin	portiunea de transect intre sosea si capcana 1 este inundata
2016.03.15	12:00:00	317	mt					0		metamorfi Ll						senin	portiunea de transect intre sosea si capcana 1 este inundata
2016.03.15	12:00:00	318	mt					0		metamorfi Ll						senin	portiunea de transect intre sosea si capcana 1 este inundata
2016.03.15	12:00:00	319	mt					0		metamorfi Ll						senin	portiunea de transect intre sosea si capcana 1 este inundata
2016.03.15	12:00:00	320	mt					0		metamorfi Ll						senin	portiunea de transect intre sosea si capcana 1 este inundata
2016.03.15	12:00:00	321	mt					0		metamorfi Ll						senin	portiunea de transect intre sosea si capcana 1 este inundata
2016.03.15	12:00:00	322	mt					0		metamorfi Ll						senin	portiunea de transect intre sosea si capcana 1 este inundata
2016.03.15	12:00:00	323	mt					0		metamorfi Ll						senin	portiunea de transect intre sosea si capcana 1 este inundata
2016.03.15	12:00:00	324	mt					0		metamorfi Ll						senin	portiunea de transect intre sosea si capcana 1 este inundata
2016.03.15	12:00:00	325	mt					0		metamorfi Ll						senin	portiunea de transect intre sosea si capcana 1 este inundata
2016.03.15	12:00:00	326	mt					0		metamorfi Ll						senin	portiunea de transect intre sosea si capcana 1 este inundata
2016.03.15	12:00:00	327	mt					0		metamorfi Ll						senin	portiunea de transect intre sosea si capcana 1 este inundata
2016.03.15	12:00:00	328	mt					0		metamorfi Ll						senin	portiunea de transect intre sosea si capcana 1 este inundata
2016.03.15	12:00:00	329	mt					0		metamorfi Ll						senin	portiunea de transect intre sosea si capcana 1 este inundata
2016.03.15	12:00:00	330	mt					0		metamorfi Ll						senin	portiunea de transect intre sosea si capcana 1 este inundata
2016.03.15	12:00:00	331	mt					0		metamorfi Ll						senin	portiunea de transect intre sosea si capcana 1 este inundata
2016.03.15	12:00:00	332	mt					0		metamorfi Ll						senin	portiunea de transect intre sosea si capcana 1 este inundata
2016.03.15	12:00:00	333	mt					0		metamorfi Ll						senin	portiunea de transect intre sosea si capcana 1 este inundata
[truncated: 998 more rows]

## Sheet: Sheet3
Data	Ora inceput transect	Avg temp	Avg hum
2016.03.10	01:00:00	27	86.7107
2016.03.11	17:00:00	28.124	85.0248
2016.03.11	03:00:00	25.5	89
2016.03.12	17:00:00	30.4504	74.9421
2016.03.12	05:00:00	25.8388	89
2016.03.13	17:00:00	30.9628	73.876
2016.03.14	09:00:00	28.3099	86.0496
2016.03.14	19:00:00	27.3678	85.0826
2016.03.15	11:00:00	32.1612	67.0331
2016.03.15	21:00:00	26.4917	85.4876
2016.03.16	13:00:00	35.2686	60.2934
2016.03.16	23:00:00	27	84.9504
2016.03.17	15:00:00	32.3017	66.7355
2016.03.17	01:00:00	26.595	86.4711
2016.03.18	13:00:00	32.5331	70.9463
